# Supplementary material for: Single-cell sequencing characterizes intratumoral profile of immune cells in old mice
Source: bioRxiv preprint, doi:10.1101/2021.02.23.432366, version 1 (2021-02-23)
Supplement: The top differentially expressed genes of each cluster for all immune cells [file 432366_file04.xlsx]

## Sheet: zuizhongmarker
	p_val	avg_logFC	pct.1	pct.2	p_val_adj	cluster	gene
Ubc1	5.87e-07	0.32083	0.933	0.831	0.00939472	pDC	Ubc
Ccl42	4.25e-07	0.290686	0.589	0.411	0.00681104	pDC	Ccl4
Aph1a	3.05e-07	0.261632	0.263	0.161	0.00488324	pDC	Aph1a
Nucb1	2.84e-07	0.258303	0.256	0.152	0.00455309	pDC	Nucb1
Btg21	2.19e-07	0.397982	0.618	0.49	0.00351338	pDC	Btg2
Tmem219	6.52e-08	0.27113	0.277	0.167	0.00104346	pDC	Tmem219
Psmb21	3.71e-08	0.266133	0.491	0.35	0.000594676	pDC	Psmb2
Srebf21	2.94e-08	0.291236	0.27	0.158	0.000470562	pDC	Srebf2
Ift20	8.98e-09	0.262011	0.323	0.192	0.000143793	pDC	Ift20
Necap21	7.9e-09	0.305546	0.305	0.184	0.000126529	pDC	Necap2
Acadl1	7.66e-09	0.309037	0.312	0.185	0.000122664	pDC	Acadl
Anp32e1	6.58e-09	0.261166	0.386	0.245	0.000105374	pDC	Anp32e
Dnajb111	4.09e-09	0.268858	0.33	0.201	6.55e-05	pDC	Dnajb11
Ssr3	3.97e-09	0.283458	0.386	0.248	6.35e-05	pDC	Ssr3
Gorasp2	2.31e-09	0.270588	0.256	0.137	3.69e-05	pDC	Gorasp2
Coa3	1.68e-09	0.2532	0.33	0.197	2.69e-05	pDC	Coa3
Tmem208	1.03e-09	0.269875	0.302	0.173	1.66e-05	pDC	Tmem208
Mrpl23	8.44e-10	0.250722	0.414	0.259	1.35e-05	pDC	Mrpl23
Ebp	7.78e-10	0.265143	0.295	0.165	1.25e-05	pDC	Ebp
Canx	6.44e-10	0.256332	0.533	0.357	1.03e-05	pDC	Canx
Smarca4	5.56e-10	0.280324	0.288	0.157	8.9e-06	pDC	Smarca4
Naxe	4.01e-10	0.310206	0.281	0.155	6.42e-06	pDC	Naxe
Emc4	3.55e-10	0.314226	0.256	0.137	5.68e-06	pDC	Emc4
Acaa1a	2.2e-10	0.268081	0.337	0.194	3.52e-06	pDC	Acaa1a
Rer1	2.16e-10	0.339375	0.379	0.236	3.46e-06	pDC	Rer1
Dctn3	2.13e-10	0.276179	0.53	0.353	3.42e-06	pDC	Dctn3
Dhx91	1.73e-10	0.28399	0.302	0.163	2.77e-06	pDC	Dhx9
Tmem14c1	1.06e-10	0.264181	0.544	0.355	1.7e-06	pDC	Tmem14c
Ppp1r11	9.23e-11	0.261621	0.425	0.261	1.48e-06	pDC	Ppp1r11
Vdac11	7.18e-11	0.254377	0.386	0.229	1.15e-06	pDC	Vdac1
Hnrnpf	6.85e-11	0.267617	0.691	0.5	1.1e-06	pDC	Hnrnpf
Pebp11	6.41e-11	0.304054	0.46	0.293	1.03e-06	pDC	Pebp1
Dpm3	5.34e-11	0.292977	0.379	0.223	8.55e-07	pDC	Dpm3
Ndufv2	5.15e-11	0.26741	0.421	0.26	8.25e-07	pDC	Ndufv2
Os9	3.98e-11	0.296059	0.365	0.21	6.38e-07	pDC	Os9
Fndc3a	3.98e-11	0.276503	0.26	0.129	6.37e-07	pDC	Fndc3a
Skap22	3.28e-11	0.289103	0.368	0.214	5.25e-07	pDC	Skap2
Csk	3.19e-11	0.255911	0.351	0.199	5.11e-07	pDC	Csk
Slc25a41	3.17e-11	0.259991	0.309	0.164	5.07e-07	pDC	Slc25a4
Ndufs7	2.12e-11	0.259987	0.446	0.272	3.39e-07	pDC	Ndufs7
Creld2	1.96e-11	0.294939	0.291	0.152	3.14e-07	pDC	Creld2
Psma5	1.48e-11	0.330033	0.386	0.228	2.36e-07	pDC	Psma5
Nudc	1.33e-11	0.290938	0.368	0.21	2.13e-07	pDC	Nudc
Atp6v1h	1.32e-11	0.282179	0.253	0.124	2.12e-07	pDC	Atp6v1h
Grb21	1.3e-11	0.287099	0.526	0.344	2.08e-07	pDC	Grb2
Eif3d	1.17e-11	0.270034	0.347	0.191	1.87e-07	pDC	Eif3d
Lamtor42	9.67e-12	0.275601	0.481	0.293	1.55e-07	pDC	Lamtor4
Mrps7	9.28e-12	0.282075	0.291	0.151	1.49e-07	pDC	Mrps7
Trappc4	7.36e-12	0.30681	0.393	0.231	1.18e-07	pDC	Trappc4
Atg3	5.86e-12	0.297386	0.382	0.221	9.39e-08	pDC	Atg3
Nub1	5.87e-12	0.253524	0.256	0.123	9.39e-08	pDC	Nub1
Aes2	5.02e-12	0.286727	0.425	0.249	8.03e-08	pDC	Aes
Tmbim4	4.92e-12	0.258708	0.442	0.267	7.87e-08	pDC	Tmbim4
Sec61g2	4.89e-12	0.357656	0.789	0.594	7.84e-08	pDC	Sec61g
Laptm4a1	4.48e-12	0.28522	0.46	0.274	7.17e-08	pDC	Laptm4a
Tmem258	4.02e-12	0.344043	0.561	0.381	6.43e-08	pDC	Tmem258
Copz1	3.03e-12	0.316117	0.358	0.203	4.85e-08	pDC	Copz1
Srp191	2.72e-12	0.290061	0.428	0.256	4.36e-08	pDC	Srp19
Skp1a	2.6e-12	0.261514	0.474	0.283	4.16e-08	pDC	Skp1a
Wdr83os	2.59e-12	0.289872	0.46	0.282	4.14e-08	pDC	Wdr83os
Pa2g41	2.25e-12	0.326794	0.393	0.226	3.6e-08	pDC	Pa2g4
Fam46c	2.19e-12	0.267362	0.295	0.147	3.51e-08	pDC	Fam46c
Psmb5	2.1e-12	0.274455	0.625	0.409	3.37e-08	pDC	Psmb5
Eif3m3	2.1e-12	0.281054	0.54	0.341	3.36e-08	pDC	Eif3m
Cldnd1	2.08e-12	0.260801	0.27	0.131	3.33e-08	pDC	Cldnd1
Ak21	2.02e-12	0.369615	0.418	0.252	3.24e-08	pDC	Ak2
Snx17	1.69e-12	0.323906	0.277	0.14	2.7e-08	pDC	Snx17
Eef1g3	1.43e-12	0.263371	0.702	0.487	2.29e-08	pDC	Eef1g
Sumo22	1.23e-12	0.260677	0.73	0.512	1.97e-08	pDC	Sumo2
Ptpn11	1.21e-12	0.261205	0.558	0.357	1.94e-08	pDC	Ptpn1
Glrx3	9.15e-13	0.345424	0.33	0.18	1.46e-08	pDC	Glrx3
Phb2	7.98e-13	0.281669	0.435	0.251	1.28e-08	pDC	Phb2
Sdhb	4.91e-13	0.347279	0.505	0.321	7.86e-09	pDC	Sdhb
Wbp2	4.78e-13	0.276144	0.358	0.19	7.66e-09	pDC	Wbp2
Pomp2	4.03e-13	0.299351	0.733	0.485	6.45e-09	pDC	Pomp
Ndufs2	2.87e-13	0.351805	0.347	0.191	4.6e-09	pDC	Ndufs2
Mbnl14	2.37e-13	0.260644	0.547	0.334	3.79e-09	pDC	Mbnl1
Atp5f1	2.33e-13	0.290651	0.723	0.486	3.74e-09	pDC	Atp5f1
Cbfa2t31	2.12e-13	0.296523	0.27	0.124	3.39e-09	pDC	Cbfa2t3
Sms1	1.53e-13	0.29963	0.305	0.149	2.46e-09	pDC	Sms
Lims1	8.64e-14	0.347302	0.309	0.155	1.38e-09	pDC	Lims1
Cops6	8.46e-14	0.307283	0.305	0.153	1.35e-09	pDC	Cops6
Tspan31	7.4e-14	0.330914	0.256	0.117	1.18e-09	pDC	Tspan31
Rbck1	7.26e-14	0.277047	0.291	0.137	1.16e-09	pDC	Rbck1
Itm2c2	6.9e-14	0.313887	0.456	0.264	1.1e-09	pDC	Itm2c
Mrpl24	6.51e-14	0.318249	0.382	0.21	1.04e-09	pDC	Mrpl24
Trappc2l2	6.25e-14	0.312995	0.396	0.221	1e-09	pDC	Trappc2l
Ndufs3	5.44e-14	0.313088	0.4	0.223	8.71e-10	pDC	Ndufs3
Jpt11	5.33e-14	0.317513	0.688	0.469	8.54e-10	pDC	Jpt1
Acbd6	5.07e-14	0.282688	0.27	0.124	8.13e-10	pDC	Acbd6
Lman2	4.81e-14	0.327774	0.463	0.277	7.71e-10	pDC	Lman2
Fkbp4	4.5e-14	0.292141	0.302	0.145	7.21e-10	pDC	Fkbp4
Ddrgk1	4.05e-14	0.31318	0.372	0.2	6.48e-10	pDC	Ddrgk1
Pycard2	3.86e-14	0.324384	0.526	0.32	6.18e-10	pDC	Pycard
Mrps161	3.76e-14	0.303804	0.414	0.233	6.02e-10	pDC	Mrps16
Minos11	3.51e-14	0.3364	0.572	0.355	5.62e-10	pDC	Minos1
Naca2	3.34e-14	0.266903	0.933	0.764	5.34e-10	pDC	Naca
Srsf51	3.23e-14	0.295427	0.765	0.549	5.18e-10	pDC	Srsf5
Magt1	3.08e-14	0.327387	0.284	0.137	4.93e-10	pDC	Magt1
Trappc6a	2.66e-14	0.354119	0.333	0.17	4.27e-10	pDC	Trappc6a
Lsm61	2.41e-14	0.258031	0.396	0.209	3.86e-10	pDC	Lsm6
Tex261	2.24e-14	0.323395	0.298	0.143	3.59e-10	pDC	Tex261
Atp6ap2	2.24e-14	0.311623	0.389	0.211	3.58e-10	pDC	Atp6ap2
Cox7a2l2	2.21e-14	0.28887	0.632	0.416	3.53e-10	pDC	Cox7a2l
Rbm31	1.95e-14	0.301679	0.884	0.664	3.13e-10	pDC	Rbm3
Mrpl34	1.41e-14	0.317708	0.316	0.155	2.25e-10	pDC	Mrpl34
Atp2b4	1.36e-14	0.287544	0.267	0.116	2.17e-10	pDC	Atp2b4
Map7d11	1.34e-14	0.330332	0.305	0.147	2.15e-10	pDC	Map7d1
Nceh11	1.18e-14	0.272837	0.298	0.137	1.89e-10	pDC	Nceh1
Tomm20	6.26e-15	0.309372	0.674	0.455	1e-10	pDC	Tomm20
Chd91	5.86e-15	0.380332	0.309	0.151	9.39e-11	pDC	Chd9
Arl6ip4	4.62e-15	0.349677	0.302	0.142	7.4e-11	pDC	Arl6ip4
Arhgap30	3.86e-15	0.295545	0.435	0.236	6.18e-11	pDC	Arhgap30
Slc38a11	3.14e-15	0.323491	0.474	0.272	5.03e-11	pDC	Slc38a1
BC004004	3.14e-15	0.315722	0.284	0.13	5.02e-11	pDC	BC004004
H2-M3	2.9e-15	0.348768	0.312	0.15	4.64e-11	pDC	H2-M3
Pkib1	2.55e-15	0.361637	0.26	0.112	4.08e-11	pDC	Pkib
Srp91	2.44e-15	0.310035	0.761	0.521	3.91e-11	pDC	Srp9
Dcaf7	2.21e-15	0.330965	0.26	0.112	3.54e-11	pDC	Dcaf7
Asah11	2.12e-15	0.383112	0.316	0.154	3.4e-11	pDC	Asah1
Serbp13	2.08e-15	0.275575	0.744	0.493	3.34e-11	pDC	Serbp1
Tmem147	1.96e-15	0.365304	0.288	0.134	3.14e-11	pDC	Tmem147
Pcbp21	1.5e-15	0.285441	0.849	0.633	2.4e-11	pDC	Pcbp2
Rab14	1.4e-15	0.336801	0.526	0.316	2.24e-11	pDC	Rab14
Atg5	1.16e-15	0.325892	0.263	0.113	1.86e-11	pDC	Atg5
Commd3	1.14e-15	0.356142	0.326	0.159	1.82e-11	pDC	Commd3
Vcp	1.09e-15	0.354693	0.589	0.368	1.75e-11	pDC	Vcp
Sec13	9.17e-16	0.364755	0.344	0.173	1.47e-11	pDC	Sec13
Klf24	8.71e-16	0.471434	0.512	0.275	1.39e-11	pDC	Klf2
Psmb92	8.14e-16	0.326445	0.6	0.361	1.3e-11	pDC	Psmb9
Txn2	7.98e-16	0.359121	0.428	0.235	1.28e-11	pDC	Txn2
Hint3	7.79e-16	0.372291	0.26	0.112	1.25e-11	pDC	Hint3
Borcs8	5.54e-16	0.327722	0.305	0.14	8.87e-12	pDC	Borcs8
Trib12	5.14e-16	0.297698	0.579	0.343	8.23e-12	pDC	Trib1
Rassf41	4.72e-16	0.369519	0.309	0.143	7.56e-12	pDC	Rassf4
Hspa81	3.68e-16	0.634492	0.919	0.792	5.9e-12	pDC	Hspa8
Ptpre2	1.51e-16	0.318952	0.372	0.18	2.41e-12	pDC	Ptpre
Lman1	1.38e-16	0.371167	0.263	0.113	2.21e-12	pDC	Lman1
M6pr	1.32e-16	0.416113	0.547	0.336	2.12e-12	pDC	M6pr
Osgep	1.17e-16	0.365754	0.263	0.112	1.87e-12	pDC	Osgep
Hyou1	9.9e-17	0.38376	0.253	0.104	1.59e-12	pDC	Hyou1
Hmgn21	9.3e-17	0.313987	0.477	0.262	1.49e-12	pDC	Hmgn2
Selenot	9.16e-17	0.355865	0.351	0.17	1.47e-12	pDC	Selenot
Snrpd22	7.53e-17	0.336071	0.544	0.315	1.21e-12	pDC	Snrpd2
Cct5	5.72e-17	0.387776	0.488	0.275	9.17e-13	pDC	Cct5
Rpn2	4.98e-17	0.377959	0.396	0.208	7.98e-13	pDC	Rpn2
Prkcd2	4.71e-17	0.444079	0.46	0.256	7.55e-13	pDC	Prkcd
mt-Nd51	4.35e-17	0.289011	0.832	0.591	6.96e-13	pDC	mt-Nd5
Tacc12	4.06e-17	0.383094	0.449	0.242	6.5e-13	pDC	Tacc1
Mpc11	3.79e-17	0.381038	0.544	0.32	6.06e-13	pDC	Mpc1
Sik1	3.78e-17	0.337768	0.302	0.131	6.05e-13	pDC	Sik1
Eif3h3	3.61e-17	0.31055	0.772	0.523	5.78e-13	pDC	Eif3h
Hnrnpl1	3.38e-17	0.32906	0.505	0.282	5.41e-13	pDC	Hnrnpl
Hsph11	3.22e-17	0.554055	0.393	0.199	5.15e-13	pDC	Hsph1
Mdh13	2.52e-17	0.329158	0.498	0.272	4.04e-13	pDC	Mdh1
Plp2	2.18e-17	0.403776	0.389	0.196	3.5e-13	pDC	Plp2
Ndufb10	1.78e-17	0.396477	0.611	0.387	2.85e-13	pDC	Ndufb10
Rpl74	1.43e-17	0.254764	0.979	0.82	2.29e-13	pDC	Rpl7
Rpl294	1.09e-17	0.254128	0.986	0.81	1.75e-13	pDC	Rpl29
2021-03-02	9.19e-18	0.347398	0.379	0.186	1.47e-13	pDC	2021-03-02
Ndufs8	8.62e-18	0.391022	0.411	0.215	1.38e-13	pDC	Ndufs8
U2af1	8.22e-18	0.408898	0.554	0.334	1.32e-13	pDC	U2af1
Scarb2	6.08e-18	0.410382	0.34	0.159	9.73e-14	pDC	Scarb2
H2-Q44	5.6e-18	0.327534	0.67	0.408	8.97e-14	pDC	H2-Q4
Exosc5	4.42e-18	0.38839	0.281	0.119	7.07e-14	pDC	Exosc5
Nptn	4.28e-18	0.360307	0.284	0.118	6.86e-14	pDC	Nptn
Rpl36al	3.57e-18	0.357195	0.558	0.326	5.72e-14	pDC	Rpl36al
Uchl3	2.26e-18	0.346682	0.256	0.1	3.62e-14	pDC	Uchl3
Spcs1	1.95e-18	0.412625	0.628	0.391	3.13e-14	pDC	Spcs1
Psmb82	1.15e-18	0.340958	0.86	0.582	1.84e-14	pDC	Psmb8
Trmt1122	1.04e-18	0.335556	0.667	0.407	1.66e-14	pDC	Trmt112
Hspa51	1.01e-18	0.285051	0.912	0.668	1.61e-14	pDC	Hspa5
Emc10	8.32e-19	0.388638	0.309	0.135	1.33e-14	pDC	Emc10
Ergic3	8.05e-19	0.348279	0.351	0.161	1.29e-14	pDC	Ergic3
Imp31	7.01e-19	0.333245	0.354	0.159	1.12e-14	pDC	Imp3
Rab24	5.9e-19	0.353414	0.316	0.137	9.46e-15	pDC	Rab24
Ssr2	4.31e-19	0.458493	0.421	0.218	6.91e-15	pDC	Ssr2
Mrps26	2.76e-19	0.367824	0.295	0.121	4.42e-15	pDC	Mrps26
Med101	2.65e-19	0.370832	0.481	0.253	4.25e-15	pDC	Med10
Ndufb113	2.09e-19	0.371776	0.74	0.484	3.34e-15	pDC	Ndufb11
Rpl313	2.09e-19	0.26266	0.975	0.775	3.34e-15	pDC	Rpl3
Foxp12	2.06e-19	0.382787	0.498	0.259	3.29e-15	pDC	Foxp1
Nsa22	1.73e-19	0.371947	0.828	0.599	2.78e-15	pDC	Nsa2
Tmem50a3	1.56e-19	0.33602	0.733	0.474	2.5e-15	pDC	Tmem50a
Emc3	1.43e-19	0.326638	0.305	0.126	2.28e-15	pDC	Emc3
Scamp2	1.1e-19	0.433318	0.442	0.23	1.77e-15	pDC	Scamp2
Atxn7l3b	8.42e-20	0.363147	0.533	0.291	1.35e-15	pDC	Atxn7l3b
Jund2	6.06e-20	0.418248	0.86	0.624	9.7e-16	pDC	Jund
Tcirg12	4.99e-20	0.388621	0.421	0.205	7.98e-16	pDC	Tcirg1
mt-Nd42	4.87e-20	0.314647	0.93	0.72	7.81e-16	pDC	mt-Nd4
Itga42	4.41e-20	0.396498	0.453	0.224	7.05e-16	pDC	Itga4
Ostc	2.47e-20	0.427912	0.54	0.302	3.96e-16	pDC	Ostc
Arhgap17	2.2e-20	0.434291	0.291	0.117	3.52e-16	pDC	Arhgap17
Bscl2	1.54e-20	0.400763	0.323	0.137	2.46e-16	pDC	Bscl2
Pik3cd	1.48e-20	0.393113	0.323	0.134	2.37e-16	pDC	Pik3cd
Cd72	1.41e-20	0.300354	0.281	0.104	2.25e-16	pDC	Cd72
Rtcb	7.57e-21	0.367223	0.316	0.131	1.21e-16	pDC	Rtcb
Gpr137b2	6.33e-21	0.392547	0.4	0.186	1.01e-16	pDC	Gpr137b
Ufc1	5.83e-21	0.392922	0.474	0.247	9.33e-17	pDC	Ufc1
Dhrs7	4.49e-21	0.322411	0.284	0.107	7.2e-17	pDC	Dhrs7
Dad13	4.38e-21	0.383232	0.751	0.486	7.02e-17	pDC	Dad1
Stt3a	3.3e-21	0.40153	0.323	0.134	5.28e-17	pDC	Stt3a
Gtf2i1	2.63e-21	0.337015	0.302	0.112	4.21e-17	pDC	Gtf2i
Gm420311	2.02e-21	0.479976	0.323	0.134	3.24e-17	pDC	Gm42031
Ifnar1	1.7e-21	0.389639	0.389	0.177	2.72e-17	pDC	Ifnar1
Pdia3	1.16e-21	0.393585	0.719	0.428	1.85e-17	pDC	Pdia3
Tecr	9.57e-22	0.432856	0.442	0.215	1.53e-17	pDC	Tecr
Smdt12	6.09e-22	0.381862	0.821	0.509	9.75e-18	pDC	Smdt1
Blvrb1	5.85e-22	0.306298	0.368	0.154	9.36e-18	pDC	Blvrb
Ctsa2	3.38e-22	0.407847	0.639	0.358	5.41e-18	pDC	Ctsa
Tapbp1	2.99e-22	0.420708	0.614	0.355	4.78e-18	pDC	Tapbp
Cd824	2.92e-22	0.344613	0.484	0.224	4.67e-18	pDC	Cd82
Hmg20b	2.63e-22	0.39349	0.305	0.12	4.21e-18	pDC	Hmg20b
Rnf167	2.3e-22	0.334796	0.26	0.089	3.68e-18	pDC	Rnf167
Mrpl181	1.81e-22	0.44619	0.425	0.201	2.9e-18	pDC	Mrpl18
Mrfap1	1.44e-22	0.391051	0.614	0.35	2.31e-18	pDC	Mrfap1
Jtb	1.11e-22	0.426112	0.396	0.183	1.78e-18	pDC	Jtb
Hspa1a1	1.04e-22	0.911133	0.449	0.224	1.67e-18	pDC	Hspa1a
Psmb11	5.54e-23	0.396882	0.782	0.51	8.87e-19	pDC	Psmb1
Cox4i1	4.74e-23	0.351721	0.954	0.806	7.59e-19	pDC	Cox4i1
H2-T221	4.22e-23	0.423158	0.519	0.262	6.75e-19	pDC	H2-T22
Sp1401	4.1e-23	0.444216	0.46	0.221	6.57e-19	pDC	Sp140
Swi5	4.02e-23	0.448895	0.604	0.348	6.44e-19	pDC	Swi5
2021-06-01	2.76e-23	1.13595	0.684	0.477	4.42e-19	pDC	Jun
Ppm1h	2.1e-23	0.405299	0.26	0.089	3.37e-19	pDC	Ppm1h
Ccdc107	1.84e-23	0.375552	0.253	0.085	2.94e-19	pDC	Ccdc107
Slc35b1	1.63e-23	0.449922	0.393	0.177	2.61e-19	pDC	Slc35b1
Ywhae1	1.58e-23	0.442393	0.709	0.433	2.53e-19	pDC	Ywhae
Scand1	1.45e-23	0.390083	0.849	0.589	2.32e-19	pDC	Scand1
Eef25	9.99e-24	0.375298	0.944	0.724	1.6e-19	pDC	Eef2
Sptssa	5.9e-24	0.471937	0.396	0.176	9.45e-20	pDC	Sptssa
Oaz11	3.8e-24	0.329149	0.986	0.841	6.09e-20	pDC	Oaz1
Fbl1	3.05e-24	0.451576	0.516	0.26	4.88e-20	pDC	Fbl
Zfp36l13	2.46e-24	0.557362	0.674	0.389	3.93e-20	pDC	Zfp36l1
Zfp7062	2.21e-24	0.449888	0.586	0.316	3.53e-20	pDC	Zfp706
Rpl283	1.5e-24	0.289495	1	0.88	2.4e-20	pDC	Rpl28
Macf13	1.34e-24	0.375694	0.484	0.224	2.15e-20	pDC	Macf1
Atp5g22	1.03e-24	0.41829	0.902	0.629	1.65e-20	pDC	Atp5g2
Atraid	7.81e-25	0.403465	0.27	0.093	1.25e-20	pDC	Atraid
Erp292	5.65e-25	0.448128	0.688	0.397	9.04e-21	pDC	Erp29
Rpl84	4.85e-25	0.265506	0.993	0.886	7.76e-21	pDC	Rpl8
2410015M20Rik	3.28e-25	0.423598	0.537	0.273	5.25e-21	pDC	2410015M20Rik
Eif5a1	3.15e-25	0.40341	0.853	0.543	5.04e-21	pDC	Eif5a
Tubb2a	3.1e-25	0.49544	0.291	0.103	4.97e-21	pDC	Tubb2a
Sec61a1	3.01e-25	0.463874	0.46	0.217	4.82e-21	pDC	Sec61a1
Stt3b	2.84e-25	0.407512	0.291	0.103	4.54e-21	pDC	Stt3b
Svbp	2.76e-25	0.453839	0.368	0.152	4.41e-21	pDC	Svbp
Anapc5	1.98e-25	0.432321	0.372	0.153	3.17e-21	pDC	Anapc5
Hnrnpul11	1.52e-25	0.428608	0.404	0.172	2.44e-21	pDC	Hnrnpul1
Pkp3	1.33e-25	0.36594	0.291	0.1	2.13e-21	pDC	Pkp3
Hnrnpa11	1.16e-25	0.447244	0.698	0.402	1.85e-21	pDC	Hnrnpa1
Rplp02	1.01e-25	0.287749	0.996	0.872	1.62e-21	pDC	Rplp0
Rtraf2	8.6e-26	0.470794	0.67	0.377	1.38e-21	pDC	Rtraf
Gng12	7.33e-26	0.464908	0.368	0.151	1.17e-21	pDC	Gng12
Rnf13	5.37e-26	0.408859	0.281	0.096	8.6e-22	pDC	Rnf13
Cd8b12	4.88e-26	0.626235	0.33	0.117	7.81e-22	pDC	Cd8b1
Ssr1	4.61e-26	0.445575	0.428	0.19	7.39e-22	pDC	Ssr1
Hsp90aa11	3.45e-26	0.904172	0.86	0.682	5.52e-22	pDC	Hsp90aa1
mt-Atp62	2.36e-26	0.27326	0.996	0.908	3.78e-22	pDC	mt-Atp6
Snx9	1.55e-26	0.466504	0.27	0.09	2.48e-22	pDC	Snx9
Uvrag1	1.26e-26	0.421164	0.47	0.214	2.01e-22	pDC	Uvrag
Dbnl	1.24e-26	0.46382	0.467	0.214	1.98e-22	pDC	Dbnl
H2afj	1.01e-26	0.660947	0.828	0.573	1.61e-22	pDC	H2afj
Pdia61	9.77e-27	0.447685	0.604	0.308	1.56e-22	pDC	Pdia6
Hnrnpa2b11	3.05e-27	0.411075	0.937	0.667	4.89e-23	pDC	Hnrnpa2b1
H2-T232	2.95e-27	0.438836	0.6	0.305	4.72e-23	pDC	H2-T23
Tmed10	5.76e-28	0.458937	0.74	0.433	9.22e-24	pDC	Tmed10
Map3k81	5.28e-28	0.698847	0.442	0.196	8.45e-24	pDC	Map3k8
Aldh21	5.04e-28	0.452049	0.344	0.126	8.07e-24	pDC	Aldh2
Prkcb	4.93e-28	0.404539	0.267	0.081	7.9e-24	pDC	Prkcb
Mrps34	3.66e-28	0.51216	0.389	0.157	5.86e-24	pDC	Mrps34
Prr133	2.82e-28	0.409269	0.719	0.408	4.52e-24	pDC	Prr13
Lsp11	1.52e-28	0.384336	0.87	0.526	2.43e-24	pDC	Lsp1
H2afy1	1.45e-28	0.488536	0.646	0.339	2.32e-24	pDC	H2afy
Ubb1	1.02e-28	0.437054	0.993	0.939	1.63e-24	pDC	Ubb
Fkbp21	8.71e-29	0.55442	0.495	0.23	1.39e-24	pDC	Fkbp2
Atp5c11	6.46e-29	0.474116	0.796	0.491	1.03e-24	pDC	Atp5c1
Rpl195	4.76e-29	0.285794	1	0.911	7.63e-25	pDC	Rpl19
2310039H08Rik	2.19e-29	0.403248	0.263	0.08	3.51e-25	pDC	2310039H08Rik
Selenof	2.08e-29	0.509439	0.593	0.303	3.33e-25	pDC	Selenof
Nenf1	1.5e-29	0.474946	0.379	0.148	2.4e-25	pDC	Nenf
Surf4	8.92e-30	0.552232	0.533	0.259	1.43e-25	pDC	Surf4
Slc50a1	7.58e-30	0.423933	0.368	0.134	1.21e-25	pDC	Slc50a1
Id32	4.92e-30	1.185	0.344	0.123	7.87e-26	pDC	Id3
Serinc33	4.51e-30	0.451112	0.537	0.244	7.22e-26	pDC	Serinc3
Irf2bp2	3.77e-30	0.490284	0.425	0.171	6.03e-26	pDC	Irf2bp2
Hspa1b1	2.95e-30	1.15131	0.421	0.171	4.73e-26	pDC	Hspa1b
Atf6b	2.95e-30	0.458749	0.253	0.074	4.72e-26	pDC	Atf6b
Cnot8	1.48e-30	0.495208	0.27	0.082	2.37e-26	pDC	Cnot8
Ctsz3	1.27e-30	0.403592	0.888	0.486	2.04e-26	pDC	Ctsz
Abhd17a	7.8e-31	0.495887	0.284	0.088	1.25e-26	pDC	Abhd17a
Hmgb13	4.74e-31	0.456572	0.835	0.5	7.58e-27	pDC	Hmgb1
Trappc5	3.89e-31	0.528977	0.34	0.12	6.23e-27	pDC	Trappc5
Ppdpf2	2.97e-31	0.480906	0.526	0.238	4.76e-27	pDC	Ppdpf
Prcp1	2.7e-31	0.441447	0.393	0.15	4.32e-27	pDC	Prcp
Insig1	2.18e-31	0.482057	0.295	0.092	3.48e-27	pDC	Insig1
Ikzf1	1.99e-31	0.39271	0.316	0.1	3.19e-27	pDC	Ikzf1
Cpne3	1.62e-31	0.504114	0.354	0.126	2.59e-27	pDC	Cpne3
Mettl232	1.34e-31	0.418768	0.502	0.212	2.15e-27	pDC	Mettl23
Qdpr	1.08e-31	0.43728	0.319	0.105	1.73e-27	pDC	Qdpr
Trabd	1.78e-32	0.420209	0.27	0.077	2.85e-28	pDC	Trabd
Dnajb12	1.66e-32	1.14463	0.6	0.311	2.66e-28	pDC	Dnajb1
Slc29a3	5.97e-33	0.479499	0.256	0.071	9.56e-29	pDC	Slc29a3
Xist	5.62e-33	0.426288	0.853	0.546	9.01e-29	pDC	Xist
Ptma2	4.38e-33	0.369218	0.986	0.841	7.01e-29	pDC	Ptma
Psme11	3.84e-33	0.472557	0.933	0.623	6.14e-29	pDC	Psme1
Cops4	1.56e-33	0.459508	0.351	0.119	2.49e-29	pDC	Cops4
Evi2a	4.96e-34	0.54432	0.368	0.129	7.94e-30	pDC	Evi2a
Tmed9	3.5e-34	0.567146	0.677	0.361	5.61e-30	pDC	Tmed9
1991-09-01	1.18e-34	0.527808	0.46	0.18	1.89e-30	pDC	2021-09-09
Rftn1	1.15e-34	0.484803	0.291	0.085	1.83e-30	pDC	Rftn1
Csf2rb21	9.85e-35	0.540007	0.396	0.142	1.58e-30	pDC	Csf2rb2
Klrd14	9.62e-35	0.513405	0.467	0.17	1.54e-30	pDC	Klrd1
Kdelr1	5.74e-35	0.502556	0.432	0.167	9.19e-31	pDC	Kdelr1
Rcsd1	4.96e-35	0.401658	0.27	0.071	7.94e-31	pDC	Rcsd1
Npc23	4.63e-35	0.422778	0.958	0.665	7.42e-31	pDC	Npc2
Hsp90ab12	3.92e-35	0.590181	0.989	0.86	6.28e-31	pDC	Hsp90ab1
Gpx13	3.31e-35	0.353282	0.986	0.666	5.3e-31	pDC	Gpx1
Txnip2	1.3e-35	0.420974	0.656	0.294	2.08e-31	pDC	Txnip
Cyth4	2.62e-36	0.633058	0.604	0.289	4.2e-32	pDC	Cyth4
Cd742	1.44e-36	0.268221	0.961	0.573	2.31e-32	pDC	Cd74
Rps203	7.82e-37	0.331495	1	0.9	1.25e-32	pDC	Rps20
Mtss1	7.26e-37	0.468439	0.291	0.08	1.16e-32	pDC	Mtss1
Lgals13	5.5e-37	0.521931	0.916	0.561	8.81e-33	pDC	Lgals1
Dclre1c	2.71e-37	0.49327	0.256	0.065	4.33e-33	pDC	Dclre1c
Cnpy3	1e-37	0.500708	0.319	0.096	1.61e-33	pDC	Cnpy3
mt-Co12	7.58e-38	0.30747	1	0.951	1.21e-33	pDC	mt-Co1
Zmiz21	5.47e-38	0.562134	0.372	0.123	8.75e-34	pDC	Zmiz2
Man1a2	4.41e-38	0.495662	0.302	0.085	7.05e-34	pDC	Man1a2
Ubxn4	2.76e-38	0.614777	0.698	0.36	4.42e-34	pDC	Ubxn4
Cope	2.62e-38	0.624058	0.691	0.364	4.2e-34	pDC	Cope
Gns1	2.36e-38	0.522425	0.446	0.164	3.78e-34	pDC	Gns
Cd693	8.89e-39	1.003	0.463	0.174	1.42e-34	pDC	Cd69
Hmgcs1	7.71e-39	0.710239	0.27	0.07	1.23e-34	pDC	Hmgcs1
Hspe13	6.8e-39	0.663485	0.87	0.548	1.09e-34	pDC	Hspe1
Ebpl	4.48e-39	0.441808	0.277	0.071	7.17e-35	pDC	Ebpl
Pmvk1	4.2e-39	0.529488	0.477	0.178	6.73e-35	pDC	Pmvk
Fyb2	3.4e-39	0.524911	0.835	0.456	5.45e-35	pDC	Fyb
Rps3a14	1.85e-39	0.367174	1	0.904	2.97e-35	pDC	Rps3a1
Atp6v1d	1.39e-39	0.557479	0.582	0.255	2.23e-35	pDC	Atp6v1d
Tagap	8.06e-40	0.691055	0.267	0.066	1.29e-35	pDC	Tagap
Gsn2	3.41e-40	0.558937	0.554	0.23	5.46e-36	pDC	Gsn
Igkc1	3.33e-40	0.578233	0.302	0.078	5.33e-36	pDC	Igkc
Ssr4	1.11e-40	0.621969	0.818	0.471	1.77e-36	pDC	Ssr4
Rap1a1	6.08e-41	0.748095	0.667	0.344	9.74e-37	pDC	Rap1a
Rexo2	5.5e-41	0.657435	0.526	0.22	8.81e-37	pDC	Rexo2
Jakmip11	1.01e-41	0.463777	0.302	0.074	1.62e-37	pDC	Jakmip1
Krtcap23	1.1e-42	0.609946	0.8	0.429	1.76e-38	pDC	Krtcap2
Slc15a4	4.72e-43	0.523832	0.274	0.066	7.56e-39	pDC	Slc15a4
Zbtb20	4e-43	0.428175	0.256	0.056	6.4e-39	pDC	Zbtb20
Irf12	4.4e-44	0.738626	0.565	0.222	7.04e-40	pDC	Irf1
Tram1	3.6e-44	0.6206	0.463	0.165	5.76e-40	pDC	Tram1
Eif3f5	6.6e-45	0.584583	0.937	0.629	1.06e-40	pDC	Eif3f
Bri3bp1	3.17e-45	0.644566	0.46	0.162	5.08e-41	pDC	Bri3bp
Rps4x4	1.82e-45	0.436325	1	0.87	2.91e-41	pDC	Rps4x
H2-DMa3	1.63e-45	0.533932	0.705	0.291	2.62e-41	pDC	H2-DMa
Ivns1abp	1.02e-45	0.54948	0.358	0.1	1.63e-41	pDC	Ivns1abp
Ptms1	6.76e-46	0.636078	0.688	0.307	1.08e-41	pDC	Ptms
Mrpl38	3.13e-46	0.588079	0.351	0.097	5e-42	pDC	Mrpl38
Selenos	1.2e-46	0.710861	0.635	0.283	1.93e-42	pDC	Selenos
Ppm1m1	1e-46	0.598512	0.323	0.085	1.6e-42	pDC	Ppm1m
2021-09-14	7.31e-47	0.524598	0.561	0.189	1.17e-42	pDC	2021-09-01
Tmed2	6.8e-47	0.657694	0.74	0.373	1.09e-42	pDC	Tmed2
Pip5k1c	6.38e-47	0.631015	0.386	0.115	1.02e-42	pDC	Pip5k1c
Cd1643	1.04e-47	0.631221	0.551	0.208	1.66e-43	pDC	Cd164
Pqlc3	7.19e-48	0.492665	0.256	0.054	1.15e-43	pDC	Pqlc3
Gnas3	6.62e-48	0.625743	0.877	0.524	1.06e-43	pDC	Gnas
Zmynd8	6.4e-48	0.554157	0.316	0.077	1.03e-43	pDC	Zmynd8
Creb3	4.19e-48	0.56256	0.344	0.092	6.71e-44	pDC	Creb3
Sub14	1.84e-48	0.74995	0.947	0.729	2.95e-44	pDC	Sub1
Cmtm72	1.33e-48	0.623608	0.656	0.278	2.13e-44	pDC	Cmtm7
Rasgrp2	1.93e-49	0.520915	0.344	0.084	3.09e-45	pDC	Rasgrp2
Emp32	1.52e-49	0.69636	0.898	0.505	2.44e-45	pDC	Emp3
Tcf12	3.32e-50	0.484874	0.281	0.059	5.31e-46	pDC	Tcf12
Tom1	3.18e-51	0.508862	0.253	0.049	5.09e-47	pDC	Tom1
Arpc5l	3.08e-51	0.631859	0.491	0.164	4.93e-47	pDC	Arpc5l
Tmem59	3.07e-51	0.694734	0.67	0.297	4.91e-47	pDC	Tmem59
Alox5ap2	9.11e-52	0.500292	0.954	0.445	1.46e-47	pDC	Alox5ap
Orai3	6.66e-53	0.578377	0.267	0.054	1.07e-48	pDC	Orai3
Hsp90b11	3.84e-53	0.700434	0.919	0.585	6.15e-49	pDC	Hsp90b1
Rps114	1.44e-53	0.481381	1	0.895	2.31e-49	pDC	Rps11
Itm2b2	3.96e-54	0.567672	0.979	0.74	6.34e-50	pDC	Itm2b
Ptp4a3	2.4e-54	0.544542	0.295	0.062	3.84e-50	pDC	Ptp4a3
Selplg3	1.18e-55	0.754599	0.849	0.467	1.89e-51	pDC	Selplg
Spcs2	9.16e-56	0.79965	0.74	0.36	1.47e-51	pDC	Spcs2
Ech11	3.68e-56	0.782276	0.498	0.166	5.89e-52	pDC	Ech1
Dnajc31	1.72e-56	0.714972	0.649	0.262	2.75e-52	pDC	Dnajc3
Npc1	4.51e-57	0.634323	0.354	0.085	7.22e-53	pDC	Npc1
Dirc2	4.17e-57	0.624673	0.298	0.061	6.68e-53	pDC	Dirc2
Adipor2	2.11e-57	0.650327	0.449	0.129	3.39e-53	pDC	Adipor2
Mtdh	6.13e-58	0.705559	0.758	0.339	9.82e-54	pDC	Mtdh
Ddost	2.12e-58	0.755885	0.632	0.252	3.39e-54	pDC	Ddost
Rac24	8.6e-59	0.6909	0.93	0.567	1.38e-54	pDC	Rac2
Nr2c2ap	7.86e-59	0.616001	0.312	0.066	1.26e-54	pDC	Nr2c2ap
Fyn3	1.66e-59	0.757448	0.621	0.224	2.66e-55	pDC	Fyn
Abhd17b	1.35e-59	0.735015	0.418	0.11	2.16e-55	pDC	Abhd17b
Atp13a2	1.4e-61	0.624032	0.316	0.065	2.24e-57	pDC	Atp13a2
Cib11	1.19e-61	0.806618	0.54	0.179	1.91e-57	pDC	Cib1
Igsf8	1.13e-61	0.669721	0.319	0.067	1.81e-57	pDC	Igsf8
Hsd11b1	4.7e-62	0.588477	0.26	0.043	7.53e-58	pDC	Hsd11b1
Ly6a2	1.97e-62	1.04279	0.811	0.388	3.15e-58	pDC	Ly6a
Cnpy2	1.7e-62	0.645956	0.418	0.109	2.72e-58	pDC	Cnpy2
Rabgap1l	5.87e-63	0.649892	0.393	0.092	9.4e-59	pDC	Rabgap1l
Cd472	2.8e-63	0.80708	0.874	0.497	4.48e-59	pDC	Cd47
Fam3c	3.99e-64	0.640796	0.316	0.062	6.38e-60	pDC	Fam3c
Bmyc1	2.41e-64	0.568777	0.368	0.081	3.85e-60	pDC	Bmyc
H2-Oa1	2.32e-64	0.648527	0.351	0.074	3.71e-60	pDC	H2-Oa
Tagln21	7.01e-65	0.87614	0.909	0.547	1.12e-60	pDC	Tagln2
Apobec32	1.52e-65	0.730076	0.561	0.175	2.43e-61	pDC	Apobec3
Msmo1	3.2e-66	0.631076	0.302	0.056	5.12e-62	pDC	Msmo1
Smc61	2.6e-66	0.919	0.533	0.166	4.16e-62	pDC	Smc6
Ctsb2	1.68e-66	0.543028	0.986	0.56	2.69e-62	pDC	Ctsb
Nek6	2.93e-67	0.545409	0.27	0.045	4.7e-63	pDC	Nek6
Scpep12	2.04e-67	0.78545	0.593	0.204	3.26e-63	pDC	Scpep1
Ptprcap5	7.7e-68	0.614053	0.737	0.233	1.23e-63	pDC	Ptprcap
Slc35c2	1.14e-68	0.682616	0.382	0.086	1.83e-64	pDC	Slc35c2
Napsa3	1.04e-68	0.742699	0.751	0.279	1.66e-64	pDC	Napsa
Ly6c21	4.42e-69	0.860016	0.832	0.338	7.07e-65	pDC	Ly6c2
Sec61b1	5.94e-70	0.7529	0.961	0.658	9.51e-66	pDC	Sec61b
Gpr146	2.5e-70	0.541821	0.256	0.038	4e-66	pDC	Gpr146
Txndc5	1.9e-70	0.69818	0.326	0.062	3.05e-66	pDC	Txndc5
Fam174a	7.59e-71	0.831489	0.547	0.166	1.22e-66	pDC	Fam174a
Slc25a12	2.07e-71	0.553401	0.312	0.055	3.32e-67	pDC	Slc25a12
Cd373	1.23e-71	0.692229	0.667	0.213	1.97e-67	pDC	Cd37
Polr3gl	2.49e-72	0.496573	0.27	0.041	3.98e-68	pDC	Polr3gl
Manf1	1.66e-72	0.838448	0.814	0.358	2.66e-68	pDC	Manf
H13	3.69e-73	0.887813	0.744	0.306	5.9e-69	pDC	H13
Reep5	3.68e-73	0.873689	0.916	0.539	5.89e-69	pDC	Reep5
Runx2	6.96e-74	0.75127	0.442	0.102	1.11e-69	pDC	Runx2
Rgs101	2.5e-74	0.873405	0.688	0.249	4e-70	pDC	Rgs10
Gltp	4.79e-75	0.872184	0.642	0.223	7.67e-71	pDC	Gltp
Gpr1711	4.6e-75	0.869449	0.53	0.145	7.36e-71	pDC	Gpr171
Cnp	4.62e-76	0.7238	0.411	0.089	7.41e-72	pDC	Cnp
Tyrobp3	6.78e-77	0.759824	0.996	0.643	1.09e-72	pDC	Tyrobp
Stx7	6.26e-77	0.859596	0.6	0.191	1e-72	pDC	Stx7
Arhgef6	3.13e-77	0.677393	0.372	0.073	5.01e-73	pDC	Arhgef6
Tex2	6.01e-78	0.661443	0.351	0.064	9.62e-74	pDC	Tex2
Mgat1	1.93e-78	0.627272	0.337	0.059	3.08e-74	pDC	Mgat1
Xbp11	3.76e-80	0.900396	0.663	0.224	6.02e-76	pDC	Xbp1
Plekhm3	2.34e-80	0.573036	0.337	0.058	3.75e-76	pDC	Plekhm3
Sdc41	1.69e-81	0.975514	0.67	0.207	2.7e-77	pDC	Sdc4
Hmgn11	1.15e-82	0.826323	0.604	0.169	1.84e-78	pDC	Hmgn1
Sec11c2	7.07e-83	0.918604	0.828	0.355	1.13e-78	pDC	Sec11c
Tbc1d81	2.61e-84	0.663048	0.379	0.069	4.18e-80	pDC	Tbc1d8
Fgfr1op2	2.31e-84	0.861479	0.67	0.218	3.69e-80	pDC	Fgfr1op2
Dgcr6	1.97e-84	0.52326	0.274	0.037	3.15e-80	pDC	Dgcr6
Rpl103	6.87e-85	0.65132	0.996	0.885	1.1e-80	pDC	Rpl10
R3hdm4	2.27e-87	0.909495	0.582	0.162	3.64e-83	pDC	R3hdm4
Syngr21	2.13e-87	0.886895	0.856	0.34	3.41e-83	pDC	Syngr2
Rilpl22	1.56e-88	1.0536	0.8	0.318	2.49e-84	pDC	Rilpl2
Ppia1	1.85e-89	0.688893	0.993	0.866	2.96e-85	pDC	Ppia
Smim141	9.94e-90	0.852787	0.618	0.176	1.59e-85	pDC	Smim14
Spint21	9.33e-90	0.808408	0.498	0.11	1.49e-85	pDC	Spint2
Rnd3	2.59e-91	0.695691	0.277	0.036	4.15e-87	pDC	Rnd3
Smim24	1.72e-91	0.706596	0.312	0.045	2.75e-87	pDC	Smim24
Ptpn61	2.96e-92	0.983502	0.684	0.219	4.74e-88	pDC	Ptpn6
Plac81	1.32e-92	0.923539	0.982	0.47	2.11e-88	pDC	Plac8
Clec12a2	5.18e-95	0.878257	0.519	0.119	8.3e-91	pDC	Clec12a
Ifnar22	2.3e-95	1.01766	0.821	0.314	3.69e-91	pDC	Ifnar2
Ly6e3	1.82e-98	0.933473	0.996	0.714	2.91e-94	pDC	Ly6e
Dctn6	5e-101	0.846314	0.509	0.108	8.01e-97	pDC	Dctn6
Hvcn11	3.49e-102	0.627469	0.319	0.041	5.59e-98	pDC	Hvcn1
Traf4	5.28e-103	0.680499	0.404	0.064	8.46e-99	pDC	Traf4
Psap2	2.02e-104	1.03789	0.996	0.621	3.23e-100	pDC	Psap
Edem2	1.12e-104	0.805647	0.418	0.072	1.79e-100	pDC	Edem2
Tnfrsf13b	3.95e-105	0.72411	0.337	0.046	6.33e-101	pDC	Tnfrsf13b
Bloc1s2	1.76e-106	0.904628	0.523	0.112	2.81e-102	pDC	Bloc1s2
Bcr	1.41e-107	0.595941	0.263	0.027	2.27e-103	pDC	Bcr
Serp11	5.56e-109	1.14201	0.926	0.454	8.9e-105	pDC	Serp1
Pkig1	2.44e-109	0.830571	0.495	0.097	3.9e-105	pDC	Pkig
Rnf187	2.24e-110	1.17431	0.639	0.169	3.59e-106	pDC	Rnf187
Ly864	9.49e-115	1.06124	0.761	0.225	1.52e-110	pDC	Ly86
Ncf11	2.44e-115	1.35141	0.667	0.178	3.9e-111	pDC	Ncf1
Rps6ka1	4.49e-116	0.914856	0.474	0.084	7.19e-112	pDC	Rps6ka1
Unc93b12	2.17e-134	1.26794	0.867	0.288	3.48e-130	pDC	Unc93b1
Cdkn2d	5.96e-135	0.948136	0.593	0.11	9.54e-131	pDC	Cdkn2d
Tifa	1.39e-135	0.863531	0.386	0.048	2.23e-131	pDC	Tifa
Ptprs	3.53e-136	0.850724	0.442	0.062	5.66e-132	pDC	Ptprs
Scimp	5.56e-138	0.923877	0.453	0.065	8.9e-134	pDC	Scimp
Rpl312	3.1e-140	1.23785	1	0.66	4.96e-136	pDC	Rpl31
Lifr	2.74e-140	0.71573	0.295	0.026	4.39e-136	pDC	Lifr
Srgap3	4.76e-141	0.659796	0.267	0.02	7.63e-137	pDC	Srgap3
Slc44a2	1.02e-141	0.960227	0.481	0.071	1.63e-137	pDC	Slc44a2
Prkca	7.73e-143	0.794835	0.495	0.07	1.24e-138	pDC	Prkca
Snx52	1.09e-143	1.3544	0.891	0.309	1.75e-139	pDC	Snx5
Cd41	3.2e-144	0.837184	0.396	0.044	5.13e-140	pDC	Cd4
Cxxc5	5.08e-145	0.64943	0.256	0.018	8.14e-141	pDC	Cxxc5
Clec10a1	3.97e-145	0.922924	0.481	0.068	6.35e-141	pDC	Clec10a
Cybb2	2.17e-145	1.18412	0.916	0.277	3.47e-141	pDC	Cybb
Hmgn3	7.76e-146	0.832236	0.361	0.038	1.24e-141	pDC	Hmgn3
Ramp1	7.11e-146	1.03764	0.537	0.086	1.14e-141	pDC	Ramp1
Ctsh3	5.46e-147	1.28831	0.965	0.373	8.75e-143	pDC	Ctsh
Galk1	1.76e-147	0.871576	0.449	0.061	2.82e-143	pDC	Galk1
Mvb12a	1.21e-148	1.26473	0.782	0.213	1.94e-144	pDC	Mvb12a
Tspan131	4.16e-149	1.34785	0.933	0.333	6.66e-145	pDC	Tspan13
Dap	8.84e-150	1.20569	0.702	0.158	1.42e-145	pDC	Dap
Ccnd11	4.98e-153	1.2106	0.586	0.101	7.97e-149	pDC	Ccnd1
Mpeg12	5.14e-154	1.38024	0.898	0.28	8.23e-150	pDC	Mpeg1
Tmed3	1.75e-155	1.22009	0.719	0.164	2.81e-151	pDC	Tmed3
Adpgk	1.77e-156	0.926032	0.414	0.047	2.83e-152	pDC	Adpgk
Kmo	2.2e-157	0.803499	0.347	0.032	3.53e-153	pDC	Kmo
Pafah1b31	4.07e-159	1.06732	0.554	0.089	6.51e-155	pDC	Pafah1b3
Grn2	3.76e-160	1.45955	0.965	0.36	6.02e-156	pDC	Grn
Herpud11	1.57e-160	1.36024	0.782	0.189	2.51e-156	pDC	Herpud1
Card11	7.13e-162	0.85668	0.4	0.042	1.14e-157	pDC	Card11
Pgls1	1.71e-163	1.45752	0.94	0.344	2.74e-159	pDC	Pgls
Mef2c1	5.71e-165	1.12197	0.586	0.093	9.14e-161	pDC	Mef2c
Jaml	3.61e-165	1.06182	0.589	0.092	5.78e-161	pDC	Jaml
P2ry14	1.86e-168	0.747191	0.33	0.027	2.98e-164	pDC	P2ry14
Eepd1	4.93e-175	1.06438	0.519	0.069	7.9e-171	pDC	Eepd1
Sema4b	3.95e-177	0.724334	0.298	0.02	6.32e-173	pDC	Sema4b
Sell2	1.02e-189	1.14085	0.761	0.133	1.63e-185	pDC	Sell
St8sia41	8.99e-191	1.34555	0.747	0.142	1.44e-186	pDC	St8sia4
Slamf9	2.14e-192	1.10914	0.558	0.073	3.42e-188	pDC	Slamf9
Sla2	1.16e-201	1.01712	0.509	0.054	1.86e-197	pDC	Sla2
Ctsl1	1.85e-205	1.76576	0.972	0.276	2.97e-201	pDC	Ctsl
Bst21	1.71e-207	2.40807	1	0.468	2.74e-203	pDC	Bst2
Fam214a	5.12e-209	0.81625	0.337	0.021	8.2e-205	pDC	Fam214a
Khk	2.93e-214	0.99658	0.432	0.037	4.68e-210	pDC	Khk
Lag31	2.65e-221	1.24476	0.582	0.067	4.24e-217	pDC	Lag3
Pld42	1.96e-229	1.76283	0.961	0.264	3.15e-225	pDC	Pld4
Cdh1	6.64e-230	0.728189	0.298	0.014	1.06e-225	pDC	Cdh1
Rell1	5.78e-235	1.34977	0.688	0.095	9.26e-231	pDC	Rell1
Irf82	1.06e-237	2.01632	0.975	0.251	1.69e-233	pDC	Irf8
Them6	3.45e-241	0.940064	0.418	0.029	5.53e-237	pDC	Them6
BC147527	1.64e-248	0.706207	0.295	0.012	2.63e-244	pDC	BC147527
Ldhb	6.64e-250	0.886912	0.375	0.022	1.06e-245	pDC	Ldhb
Mctp2	6.19e-274	0.794829	0.347	0.015	9.92e-270	pDC	Mctp2
Cd73	8.91e-275	1.70921	0.814	0.113	1.43e-270	pDC	Cd7
Dnajc7	2.37e-279	1.96059	0.912	0.175	3.8e-275	pDC	Dnajc7
Gm5547	1.05e-279	1.06403	0.481	0.034	1.68e-275	pDC	Gm5547
Ppfia4	8.77e-296	1.11831	0.498	0.035	1.4e-291	pDC	Ppfia4
Lrp8	4.13e-301	0.887144	0.365	0.015	6.61e-297	pDC	Lrp8
Fcrla1	3.78e-301	0.828295	0.382	0.017	6.05e-297	pDC	Fcrla
Tmem229b	1.92e-307	0.973117	0.418	0.021	3.07e-303	pDC	Tmem229b
Klk1	0	3.30056	0.8	0.002	0	pDC	Klk1
Ly6d1	0	3.22694	0.926	0.028	0	pDC	Ly6d
Siglech	0	3.0943	0.996	0.004	0	pDC	Siglech
Cox6a2	0	3.04218	0.919	0.005	0	pDC	Cox6a2
Ccr9	0	2.3623	0.888	0.008	0	pDC	Ccr9
Pltp	0	2.21178	0.895	0.093	0	pDC	Pltp
Iglc31	0	2.0309	0.751	0.019	0	pDC	Iglc3
Rnase6	0	2.02416	0.867	0.072	0	pDC	Rnase6
Gm21762	0	1.96901	0.744	0.001	0	pDC	Gm21762
Smim5	0	1.87824	0.733	0.003	0	pDC	Smim5
Lair1	0	1.76626	0.839	0.085	0	pDC	Lair1
Atp1b11	0	1.75057	0.74	0.024	0	pDC	Atp1b1
Tcf4	0	1.61626	0.821	0.096	0	pDC	Tcf4
Tsc22d1	0	1.48023	0.632	0.042	0	pDC	Tsc22d1
Cyb561a3	0	1.47105	0.639	0.017	0	pDC	Cyb561a3
Ighm1	0	1.42649	0.944	0.142	0	pDC	Ighm
Lefty1	0	1.38903	0.561	0.007	0	pDC	Lefty1
Cd300c	0	1.37096	0.554	0.002	0	pDC	Cd300c
Nucb2	0	1.32688	0.639	0.059	0	pDC	Nucb2
Rpgrip1	0	1.32666	0.474	0.006	0	pDC	Rpgrip1
Spib	0	1.27742	0.502	0.016	0	pDC	Spib
Mzb11	0	1.27412	0.474	0.02	0	pDC	Mzb1
Klk1b27	0	1.26169	0.449	0.002	0	pDC	Klk1b27
Pacsin1	0	1.25323	0.498	0.011	0	pDC	Pacsin1
Blnk	0	1.23874	0.572	0.034	0	pDC	Blnk
Upb1	0	1.15167	0.502	0.008	0	pDC	Upb1
Sh3bgr	0	1.14935	0.439	0.001	0	pDC	Sh3bgr
Bcl11a	0	1.12732	0.456	0.015	0	pDC	Bcl11a
Dntt	0	1.04261	0.375	0.001	0	pDC	Dntt
Klra17	0	0.977743	0.418	0.014	0	pDC	Klra17
Atp2a1	0	0.943045	0.393	0.002	0	pDC	Atp2a1
Paqr5	0	0.910304	0.382	0.001	0	pDC	Paqr5
Spns3	0	0.825859	0.309	0.005	0	pDC	Spns3
Cdh5	0	0.72259	0.281	0.001	0	pDC	Cdh5
Ccdc162	0	0.6296	0.26	0.001	0	pDC	Ccdc162
Arhgef12	3.08e-06	0.306212	0.28	0.202	0.0493135	NK	Arhgef1
Lsm81	2.55e-06	0.375179	0.259	0.188	0.0408366	NK	Lsm8
Ppp1r12a	1.8e-06	0.317221	0.369	0.294	0.028868	NK	Ppp1r12a
Pld31	7.94e-07	0.3517	0.276	0.196	0.0127196	NK	Pld3
Tubb4b1	5.69e-07	0.410268	0.313	0.234	0.00911733	NK	Tubb4b
Polr1d2	5.18e-07	0.254942	0.537	0.482	0.00830179	NK	Polr1d
Ndufa41	2.8e-07	0.269463	0.57	0.505	0.00447802	NK	Ndufa4
Tln11	2.55e-07	0.298932	0.533	0.473	0.00407935	NK	Tln1
Cirbp2	1.64e-07	0.355077	0.32	0.232	0.00263103	NK	Cirbp
Nsd31	1.31e-07	0.33806	0.35	0.262	0.00210166	NK	Nsd3
Srsf5	1.16e-07	0.295097	0.598	0.553	0.00185042	NK	Srsf5
Rp91	8.44e-08	0.3574	0.343	0.258	0.00135076	NK	Rp9
Dusp51	7.94e-08	0.317831	0.507	0.43	0.00127166	NK	Dusp5
Fosl21	7.37e-08	0.290127	0.395	0.297	0.00118008	NK	Fosl2
Cox6c1	4.65e-08	0.261689	0.666	0.616	0.000744126	NK	Cox6c
Krtcap21	4.61e-08	0.337349	0.509	0.437	0.000737527	NK	Krtcap2
Serbp12	3.28e-08	0.326459	0.561	0.497	0.000524634	NK	Serbp1
Tes	2.99e-08	0.371724	0.376	0.283	0.000478888	NK	Tes
Ssh21	2.75e-08	0.334495	0.283	0.187	0.000440112	NK	Ssh2
Sqstm11	2.14e-08	0.279382	0.647	0.57	0.000341912	NK	Sqstm1
Klf22	2.07e-08	0.353997	0.388	0.277	0.000330802	NK	Klf2
Limd22	2.06e-08	0.302072	0.395	0.295	0.000329296	NK	Limd2
Dnaja11	1.78e-08	0.432763	0.586	0.511	0.00028508	NK	Dnaja1
Cnbp1	1.54e-08	0.270966	0.652	0.578	0.000246337	NK	Cnbp
Dnajc3	1.48e-08	0.397747	0.357	0.269	0.000237046	NK	Dnajc3
Klf13	1.47e-08	0.363737	0.339	0.244	0.000235073	NK	Klf13
Cd37	1.26e-08	0.262574	0.327	0.221	0.000201951	NK	Cd37
Jund	1.06e-08	0.300913	0.696	0.627	0.000168939	NK	Jund
Cenpa1	9.47e-09	0.473081	0.318	0.225	0.000151669	NK	Cenpa
Runx31	6.34e-09	0.38299	0.411	0.318	0.000101577	NK	Runx3
Tab2	3.63e-09	0.429195	0.269	0.175	5.81e-05	NK	Tab2
Dad1	2.61e-09	0.38715	0.554	0.491	4.18e-05	NK	Dad1
Ccnd22	1.7e-09	0.419574	0.32	0.215	2.72e-05	NK	Ccnd2
Pla2g161	1.54e-09	0.364766	0.318	0.212	2.46e-05	NK	Pla2g16
Epsti12	7.11e-10	0.379054	0.404	0.304	1.14e-05	NK	Epsti1
Arl6ip52	5.64e-10	0.405424	0.39	0.29	9.03e-06	NK	Arl6ip5
Dock2	4.41e-10	0.393459	0.39	0.285	7.07e-06	NK	Dock2
Atp5d1	1.78e-10	0.30198	0.682	0.614	2.85e-06	NK	Atp5d
Cox7a2	1.6e-10	0.368693	0.621	0.569	2.57e-06	NK	Cox7a2
Stk24	1.08e-10	0.458576	0.313	0.209	1.73e-06	NK	Stk24
Pfdn52	8.94e-11	0.279156	0.727	0.678	1.43e-06	NK	Pfdn5
Rgs2	7.12e-11	0.378297	0.526	0.412	1.14e-06	NK	Rgs2
Nr4a31	6.69e-11	0.385061	0.313	0.197	1.07e-06	NK	Nr4a3
Mknk21	4.45e-11	0.501736	0.346	0.239	7.12e-07	NK	Mknk2
Ndufb111	4.09e-11	0.377709	0.57	0.488	6.55e-07	NK	Ndufb11
Ier22	3.76e-11	0.321158	0.563	0.452	6.02e-07	NK	Ier2
Ccr21	2.67e-11	0.397431	0.308	0.194	4.27e-07	NK	Ccr2
Dennd4a	2.48e-11	0.455687	0.407	0.299	3.98e-07	NK	Dennd4a
Stk41	1.95e-11	0.4704	0.313	0.203	3.12e-07	NK	Stk4
Gnas1	1.86e-11	0.365017	0.605	0.531	2.98e-07	NK	Gnas
Eif3f2	1.85e-11	0.313366	0.715	0.635	2.97e-07	NK	Eif3f
Anxa61	1.74e-11	0.490999	0.325	0.216	2.79e-07	NK	Anxa6
Mbnl12	1.69e-11	0.386754	0.449	0.335	2.7e-07	NK	Mbnl1
B4galt1	1.14e-11	0.469957	0.273	0.164	1.82e-07	NK	B4galt1
Tmem234	8.28e-12	0.391243	0.481	0.381	1.33e-07	NK	Tmem234
Ndufa131	7.3e-12	0.332793	0.647	0.577	1.17e-07	NK	Ndufa13
Ptk2b	5.61e-12	0.423696	0.271	0.16	8.98e-08	NK	Ptk2b
Mdh11	5.24e-12	0.424167	0.39	0.274	8.39e-08	NK	Mdh1
Slc9a3r11	4.23e-12	0.437715	0.411	0.296	6.78e-08	NK	Slc9a3r1
Crem1	4.07e-12	0.453324	0.367	0.25	6.53e-08	NK	Crem
Bhlhe401	3.58e-12	0.41642	0.565	0.455	5.74e-08	NK	Bhlhe40
Prdx61	1.82e-12	0.27315	0.645	0.536	2.91e-08	NK	Prdx6
Pnrc11	4.78e-13	0.292135	0.696	0.605	7.66e-09	NK	Pnrc1
Supt4a2	4.47e-13	0.427976	0.54	0.444	7.16e-09	NK	Supt4a
Tnfaip3	1.95e-13	0.334345	0.652	0.527	3.13e-09	NK	Tnfaip3
Saraf2	9.65e-14	0.4177	0.449	0.319	1.55e-09	NK	Saraf
Celf22	7.98e-14	0.481753	0.444	0.318	1.28e-09	NK	Celf2
Ndfip11	6.81e-14	0.420919	0.509	0.388	1.09e-09	NK	Ndfip1
Eef1d2	6.82e-14	0.395029	0.591	0.492	1.09e-09	NK	Eef1d
Lck2	2.73e-14	0.35149	0.315	0.172	4.37e-10	NK	Lck
Hmgb11	1.3e-14	0.409831	0.624	0.505	2.09e-10	NK	Hmgb1
Prex1	8.36e-15	0.546952	0.311	0.185	1.34e-10	NK	Prex1
Tnfrsf181	7.51e-15	0.351113	0.334	0.184	1.2e-10	NK	Tnfrsf18
Atp5h1	7.03e-15	0.365648	0.75	0.679	1.13e-10	NK	Atp5h
Gpx4	4.88e-15	0.406544	0.624	0.533	7.81e-11	NK	Gpx4
Rsbn1l1	1.07e-15	0.497432	0.325	0.188	1.71e-11	NK	Rsbn1l
Eef1b22	2.34e-16	0.262653	0.834	0.739	3.75e-12	NK	Eef1b2
Arap2	3.95e-17	0.549328	0.255	0.125	6.33e-13	NK	Arap2
H2-Q42	1.33e-17	0.480038	0.551	0.409	2.13e-13	NK	H2-Q4
Eef22	3.29e-18	0.318119	0.832	0.726	5.26e-14	NK	Eef2
Sell1	2.34e-18	0.44668	0.294	0.144	3.75e-14	NK	Sell
Rpl36a2	1.74e-18	0.332666	0.783	0.705	2.79e-14	NK	Rpl36a
Rpl292	9.11e-19	0.276073	0.914	0.811	1.46e-14	NK	Rpl29
B4galnt11	6.54e-19	0.522243	0.355	0.201	1.05e-14	NK	B4galnt1
Itgb1	4.22e-19	0.57796	0.418	0.273	6.76e-15	NK	Itgb1
Zcchc111	2.99e-19	0.472026	0.304	0.154	4.79e-15	NK	Zcchc11
Cd822	2.85e-19	0.511579	0.388	0.224	4.57e-15	NK	Cd82
Rpl152	2.64e-19	0.256906	0.923	0.836	4.23e-15	NK	Rpl15
Arhgap452	1.62e-19	0.588515	0.479	0.315	2.6e-15	NK	Arhgap45
Dgat11	3.04e-20	0.556264	0.444	0.274	4.87e-16	NK	Dgat1
Rpl272	2.44e-20	0.416859	0.731	0.629	3.9e-16	NK	Rpl27
Rpl23a2	1.26e-20	0.357594	0.827	0.734	2.02e-16	NK	Rpl23a
Junb2	9.77e-21	0.326374	0.879	0.726	1.57e-16	NK	Junb
H2afv2	4.25e-21	0.518145	0.449	0.271	6.81e-17	NK	H2afv
Fryl1	2.48e-21	0.52089	0.271	0.124	3.97e-17	NK	Fryl
P2ry101	7.64e-22	0.553268	0.311	0.151	1.22e-17	NK	P2ry10
Bcl2l11	3.21e-22	0.557421	0.43	0.257	5.14e-18	NK	Bcl2l11
Pdcd4	3.13e-22	0.496526	0.255	0.108	5.01e-18	NK	Pdcd4
Rack12	1.79e-22	0.288473	0.923	0.801	2.87e-18	NK	Rack1
Cox8a1	3.87e-23	0.332349	0.921	0.827	6.19e-19	NK	Cox8a
Tiprl1	3.16e-23	0.634583	0.315	0.157	5.06e-19	NK	Tiprl
Rpl112	2.36e-23	0.251073	0.981	0.884	3.77e-19	NK	Rpl11
Stat42	4.99e-24	0.558873	0.292	0.131	7.99e-20	NK	Stat4
Rpl82	2.72e-24	0.261101	0.977	0.885	4.35e-20	NK	Rpl8
Sub12	4.83e-25	0.375884	0.864	0.729	7.74e-21	NK	Sub1
Rpl52	1.18e-25	0.318015	0.902	0.753	1.89e-21	NK	Rpl5
Tyrobp2	7.38e-26	0.275917	0.953	0.639	1.18e-21	NK	Tyrobp
Rps122	7.23e-26	0.28808	0.972	0.896	1.16e-21	NK	Rps12
Rac22	5.19e-26	0.459573	0.743	0.57	8.32e-22	NK	Rac2
Il2rg2	5.14e-26	0.515785	0.582	0.387	8.23e-22	NK	Il2rg
Sptbn1	3.54e-26	0.601428	0.276	0.117	5.67e-22	NK	Sptbn1
Gimap72	3.12e-26	0.488316	0.294	0.12	5e-22	NK	Gimap7
Rpl222	1.97e-26	0.305779	0.949	0.841	3.16e-22	NK	Rpl22
Pabpc12	1.81e-26	0.429527	0.79	0.682	2.9e-22	NK	Pabpc1
H2-D11	1.6e-26	0.310182	0.986	0.916	2.55e-22	NK	H2-D1
Rpl72	1.08e-26	0.329738	0.937	0.819	1.73e-22	NK	Rpl7
Plekha21	5.47e-27	0.567917	0.32	0.144	8.76e-23	NK	Plekha2
Spata13	4.63e-27	0.594427	0.264	0.105	7.42e-23	NK	Spata13
Ablim12	3.68e-27	0.452788	0.294	0.119	5.9e-23	NK	Ablim1
Fcer1g3	3.1e-27	0.267409	0.986	0.624	4.96e-23	NK	Fcer1g
Gimap12	2.75e-27	0.512931	0.292	0.119	4.41e-23	NK	Gimap1
Ubald21	1.28e-27	0.646663	0.577	0.399	2.04e-23	NK	Ubald2
Myl61	9.7e-28	0.358991	0.935	0.841	1.55e-23	NK	Myl6
Smad72	6.98e-28	0.607356	0.404	0.203	1.12e-23	NK	Smad7
Rpl412	3.26e-28	0.330271	0.991	0.953	5.21e-24	NK	Rpl41
Rps272	2.8e-28	0.340176	0.937	0.852	4.49e-24	NK	Rps27
Rpl22l12	2.4e-28	0.516956	0.706	0.532	3.85e-24	NK	Rpl22l1
Prkch2	1.75e-28	0.591055	0.364	0.173	2.8e-24	NK	Prkch
Tnfrsf91	1.55e-28	0.449054	0.308	0.122	2.48e-24	NK	Tnfrsf9
Rpl212	2.12e-29	0.266488	0.981	0.891	3.39e-25	NK	Rpl21
Rpl10a2	5.24e-30	0.340323	0.953	0.816	8.39e-26	NK	Rpl10a
Nudt41	5.13e-30	0.641909	0.278	0.107	8.22e-26	NK	Nudt4
Nr4a22	3.79e-30	0.740766	0.407	0.21	6.06e-26	NK	Nr4a2
Ptpn222	2.29e-30	0.617497	0.36	0.16	3.66e-26	NK	Ptpn22
Rps4x2	2.1e-30	0.276111	0.988	0.869	3.36e-26	NK	Rps4x
Rpl382	7.15e-31	0.525075	0.904	0.82	1.15e-26	NK	Rpl38
Tgfb11	4.79e-31	0.834131	0.502	0.311	7.67e-27	NK	Tgfb1
Tecpr1	4.52e-31	0.575505	0.306	0.121	7.24e-27	NK	Tecpr1
Ptpn182	4.08e-31	0.538596	0.745	0.576	6.53e-27	NK	Ptpn18
Rps212	2.37e-31	0.370702	0.949	0.854	3.8e-27	NK	Rps21
Rpl392	8.75e-33	0.406715	0.958	0.854	1.4e-28	NK	Rpl39
Rpl33	4.18e-33	0.377045	0.93	0.774	6.7e-29	NK	Rpl3
Eef1a12	3.05e-33	0.34398	0.986	0.917	4.89e-29	NK	Eef1a1
Vgll42	1.36e-33	0.615607	0.407	0.188	2.18e-29	NK	Vgll4
Rps182	1.02e-33	0.374519	0.937	0.799	1.64e-29	NK	Rps18
Rps232	1.01e-33	0.320305	0.974	0.863	1.61e-29	NK	Rps23
Ppp1r16b1	5.37e-34	0.548478	0.266	0.09	8.6e-30	NK	Ppp1r16b
Neurl31	2.15e-34	0.67674	0.47	0.242	3.44e-30	NK	Neurl3
Rpl37a2	2.1e-34	0.41566	0.956	0.881	3.37e-30	NK	Rpl37a
Cst71	7.23e-35	0.695852	0.304	0.114	1.16e-30	NK	Cst7
Rpl172	4.03e-35	0.296451	0.984	0.9	6.45e-31	NK	Rpl17
Rpl372	1.46e-35	0.390729	0.988	0.912	2.34e-31	NK	Rpl37
Fam107b2	1.13e-35	0.602281	0.643	0.413	1.8e-31	NK	Fam107b
Skap12	4.6e-36	0.519108	0.332	0.123	7.37e-32	NK	Skap1
Rps102	3.64e-36	0.294838	0.988	0.914	5.83e-32	NK	Rps10
Rpl27a2	1.24e-36	0.321861	0.988	0.899	1.99e-32	NK	Rpl27a
Zfp36l21	5.94e-38	0.716048	0.629	0.389	9.51e-34	NK	Zfp36l2
Gimap9	3.94e-38	0.631803	0.259	0.081	6.31e-34	NK	Gimap9
Rpl132	6.22e-39	0.332582	0.998	0.921	9.96e-35	NK	Rpl13
Rpl322	5.05e-39	0.359626	0.981	0.882	8.08e-35	NK	Rpl32
Bcl21	3.78e-39	0.612681	0.273	0.088	6.05e-35	NK	Bcl2
Rps3a12	3.15e-39	0.332022	0.991	0.903	5.05e-35	NK	Rps3a1
Pik3r11	9.08e-40	0.739677	0.432	0.201	1.45e-35	NK	Pik3r1
Stat31	8.95e-40	0.832698	0.607	0.396	1.43e-35	NK	Stat3
Rpl182	4.54e-40	0.345559	0.998	0.918	7.27e-36	NK	Rpl18
Rps162	3.1e-40	0.268883	0.995	0.947	4.96e-36	NK	Rps16
Rps72	1.22e-40	0.349375	0.972	0.853	1.96e-36	NK	Rps7
Rps142	3.56e-41	0.351952	0.972	0.896	5.7e-37	NK	Rps14
Selplg2	1.35e-41	0.686354	0.699	0.468	2.16e-37	NK	Selplg
Rps52	1.11e-41	0.338912	0.986	0.889	1.78e-37	NK	Rps5
Rpl192	1.2e-42	0.31562	0.998	0.91	1.92e-38	NK	Rpl19
Jakmip1	1.02e-42	0.585849	0.255	0.073	1.64e-38	NK	Jakmip1
D16Ertd472e1	3.06e-43	0.801207	0.39	0.159	4.91e-39	NK	D16Ertd472e
Ptprcap2	2.18e-43	0.571997	0.535	0.235	3.49e-39	NK	Ptprcap
Itgal2	1.85e-44	0.728122	0.428	0.18	2.96e-40	NK	Itgal
H2-Q62	1.37e-44	0.72	0.652	0.381	2.2e-40	NK	H2-Q6
Uqcrh2	1.09e-44	0.521816	0.9	0.744	1.74e-40	NK	Uqcrh
Rpl362	1.85e-46	0.433298	0.963	0.861	2.97e-42	NK	Rpl36
Emb1	1.53e-46	0.834742	0.661	0.408	2.46e-42	NK	Emb
H2-Q72	1.4e-46	0.632797	0.829	0.594	2.25e-42	NK	H2-Q7
Ets12	6.61e-47	0.625716	0.575	0.258	1.06e-42	NK	Ets1
Rpl302	4.77e-47	0.351937	0.995	0.911	7.65e-43	NK	Rpl30
Gm457161	3.31e-49	0.950691	0.364	0.133	5.31e-45	NK	Gm45716
Rpl18a2	1.78e-49	0.377599	0.993	0.934	2.84e-45	NK	Rpl18a
Shisa52	1.6e-49	0.622741	0.794	0.565	2.56e-45	NK	Shisa5
Rps112	1.02e-49	0.402548	0.993	0.893	1.63e-45	NK	Rps11
Rplp12	9.54e-50	0.390034	0.984	0.909	1.53e-45	NK	Rplp1
Nfatc11	2.51e-50	0.757018	0.336	0.109	4.03e-46	NK	Nfatc1
Rpl92	1.05e-51	0.347976	0.986	0.921	1.67e-47	NK	Rpl9
Rpl232	3.43e-52	0.359099	0.993	0.934	5.49e-48	NK	Rpl23
Rps15a2	1.67e-52	0.401906	0.993	0.882	2.67e-48	NK	Rps15a
H2-K11	4.16e-55	0.451955	0.986	0.902	6.66e-51	NK	H2-K1
Gimap32	3.83e-58	0.666799	0.507	0.187	6.13e-54	NK	Gimap3
Rps32	1.03e-58	0.431118	0.986	0.891	1.64e-54	NK	Rps3
Ptprc2	6.45e-59	0.745572	0.815	0.59	1.03e-54	NK	Ptprc
Rpl342	4.47e-59	0.431352	0.993	0.906	7.15e-55	NK	Rpl34
Rps242	7.31e-61	0.381972	0.995	0.914	1.17e-56	NK	Rps24
Jak12	4.25e-62	0.783293	0.715	0.411	6.81e-58	NK	Jak1
2021-09-12	1.67e-63	0.819476	0.5	0.187	2.67e-59	NK	2021-09-01
Tigit1	1.09e-63	0.717021	0.453	0.149	1.74e-59	NK	Tigit
Rpl101	2.86e-64	0.483634	0.97	0.884	4.58e-60	NK	Rpl10
Hcst2	1.5e-64	0.741544	0.682	0.322	2.4e-60	NK	Hcst
Klrk11	8.18e-71	0.940827	0.409	0.13	1.31e-66	NK	Klrk1
Trbc11	2.61e-73	0.676551	0.334	0.077	4.17e-69	NK	Trbc1
Id21	2.26e-73	0.877291	0.857	0.54	3.62e-69	NK	Id2
Satb11	2.81e-75	0.837911	0.437	0.126	4.5e-71	NK	Satb1
Gm19585	9.33e-85	0.801285	0.287	0.055	1.49e-80	NK	Gm19585
Gem	8.79e-86	0.991085	0.343	0.077	1.41e-81	NK	Gem
Tmsb103	5.3e-86	0.57318	1	0.899	8.48e-82	NK	Tmsb10
Vps37b2	1.93e-91	0.988137	0.759	0.363	3.1e-87	NK	Vps37b
Klrd13	6.77e-92	1.02492	0.523	0.163	1.08e-87	NK	Klrd1
Dusp22	4.21e-92	1.18122	0.703	0.325	6.75e-88	NK	Dusp2
Arsb	6.85e-93	0.888483	0.273	0.047	1.1e-88	NK	Arsb
Serpinb92	7.33e-103	1.01365	0.439	0.106	1.17e-98	NK	Serpinb9
Gimap62	7.03e-105	1.06356	0.584	0.18	1.13e-100	NK	Gimap6
Ms4a4b2	1.6e-119	1.0242	0.675	0.206	2.56e-115	NK	Ms4a4b
Gimap42	1.49e-119	1.05512	0.64	0.191	2.38e-115	NK	Gimap4
Gzmb1	2.21e-127	1.28198	0.479	0.103	3.53e-123	NK	Gzmb
Atp1b1	1.41e-127	0.815072	0.28	0.034	2.25e-123	NK	Atp1b1
Ugcg	3.35e-128	1.25912	0.514	0.129	5.36e-124	NK	Ugcg
Klrb1b	2.67e-139	0.951063	0.304	0.039	4.27e-135	NK	Klrb1b
Ifngr12	6.11e-140	1.21373	0.918	0.487	9.78e-136	NK	Ifngr1
Cd71	4.52e-148	1.2348	0.54	0.115	7.23e-144	NK	Cd7
Sh2d2a2	1.44e-148	1.13608	0.68	0.18	2.31e-144	NK	Sh2d2a
Ccl52	1.78e-162	1.70254	0.904	0.363	2.85e-158	NK	Ccl5
Ctla2a2	1.67e-179	1.42256	0.654	0.149	2.67e-175	NK	Ctla2a
Txk	1.13e-190	1.06292	0.411	0.052	1.81e-186	NK	Txk
Serpinb6b2	1.48e-193	1.40808	0.617	0.125	2.37e-189	NK	Serpinb6b
Gimap52	4.7e-195	1.31997	0.678	0.149	7.52e-191	NK	Gimap5
Ctsw2	2.6e-228	1.44219	0.647	0.119	4.16e-224	NK	Ctsw
Nrarp	1.17e-232	1.06388	0.301	0.02	1.88e-228	NK	Nrarp
Irf81	8.29e-241	1.7933	0.857	0.246	1.33e-236	NK	Irf8
Klri2	3.4e-245	0.992369	0.259	0.013	5.44e-241	NK	Klri2
Eomes	5.71e-257	1.25528	0.404	0.035	9.14e-253	NK	Eomes
AW1120101	2.14e-268	2.03837	0.986	0.39	3.42e-264	NK	AW112010
Prf1	1.17e-285	1.54819	0.435	0.037	1.87e-281	NK	Prf1
Nkg72	1.32e-290	1.69367	0.956	0.23	2.12e-286	NK	Nkg7
Gzma	0	3.96672	0.801	0.028	0	NK	Gzma
Il2rb2	0	1.86392	0.9	0.196	0	NK	Il2rb
Xcl1	0	1.85495	0.5	0.033	0	NK	Xcl1
Klra4	0	1.60617	0.294	0.001	0	NK	Klra4
Klrb1c	0	1.44751	0.47	0.009	0	NK	Klrb1c
Klre1	0	1.43896	0.498	0.028	0	NK	Klre1
Car2	0	1.34983	0.477	0.032	0	NK	Car2
Klra8	0	1.33203	0.259	0.001	0	NK	Klra8
Klra7	0	1.31536	0.343	0.01	0	NK	Klra7
Slc15a32	2.67e-06	0.512475	0.318	0.306	0.0427097	Neutrophils	Slc15a3
Sdcbp2	1.36e-06	0.572819	0.42	0.464	0.0218419	Neutrophils	Sdcbp
Etf1	4.85e-07	0.652296	0.318	0.323	0.0077619	Neutrophils	Etf1
Nktr	3.62e-07	0.708338	0.278	0.26	0.00579205	Neutrophils	Nktr
Klf21	2.83e-07	0.409118	0.317	0.278	0.00453345	Neutrophils	Klf2
BC031181	1.43e-07	0.255963	0.176	0.298	0.00229696	Neutrophils	BC031181
Atp6v1e1	1.14e-08	0.737731	0.299	0.283	0.000182655	Neutrophils	Atp6v1e1
Gda2	9.78e-09	0.476473	0.293	0.25	0.000156559	Neutrophils	Gda
Ptp4a11	9.11e-09	0.657369	0.376	0.393	0.000145905	Neutrophils	Ptp4a1
Creg12	5.91e-09	0.271249	0.161	0.281	9.46e-05	Neutrophils	Creg1
Ier5	2.96e-09	0.591863	0.444	0.476	4.73e-05	Neutrophils	Ier5
Ppp1r2	9.53e-10	0.755594	0.307	0.288	1.53e-05	Neutrophils	Ppp1r2
Gng5	4.19e-10	0.3079	0.667	0.771	6.71e-06	Neutrophils	Gng5
Ifrd12	2.58e-10	0.752598	0.499	0.548	4.13e-06	Neutrophils	Ifrd1
Tgm22	7.99e-11	0.580234	0.305	0.254	1.28e-06	Neutrophils	Tgm2
Txn1	1.48e-11	0.637657	0.498	0.571	2.37e-07	Neutrophils	Txn1
Tnf2	9.76e-12	0.877763	0.327	0.28	1.56e-07	Neutrophils	Tnf
Sra1	5.93e-12	0.780949	0.352	0.342	9.49e-08	Neutrophils	Sra1
Phlda11	5.35e-12	0.70033	0.358	0.314	8.56e-08	Neutrophils	Phlda1
Aldoa1	4.73e-12	0.4971	0.583	0.637	7.57e-08	Neutrophils	Aldoa
Pkm1	1.36e-12	0.404991	0.59	0.63	2.18e-08	Neutrophils	Pkm
Clec4n1	1.27e-12	0.821417	0.268	0.207	2.03e-08	Neutrophils	Clec4n
Anxa12	1.51e-13	0.954517	0.257	0.2	2.42e-09	Neutrophils	Anxa1
Fosl2	5.68e-15	0.691744	0.344	0.296	9.09e-11	Neutrophils	Fosl2
Tgoln1	1.63e-15	0.772949	0.334	0.29	2.6e-11	Neutrophils	Tgoln1
Cdk2ap21	1.34e-15	0.888739	0.443	0.454	2.15e-11	Neutrophils	Cdk2ap2
Atp6v0e	9.49e-16	0.630258	0.517	0.582	1.52e-11	Neutrophils	Atp6v0e
Emilin22	4.37e-16	0.584152	0.328	0.262	7.01e-12	Neutrophils	Emilin2
Csrnp11	3.82e-17	0.803968	0.354	0.307	6.11e-13	Neutrophils	Csrnp1
Snx181	9.57e-18	0.707505	0.304	0.237	1.53e-13	Neutrophils	Snx18
Ccnl1	4.65e-19	0.617204	0.497	0.511	7.45e-15	Neutrophils	Ccnl1
Taldo12	3.5e-19	0.844365	0.456	0.462	5.6e-15	Neutrophils	Taldo1
Cd53	2.13e-21	0.62014	0.538	0.574	3.41e-17	Neutrophils	Cd53
Nfe2l22	3.87e-22	0.762237	0.373	0.307	6.2e-18	Neutrophils	Nfe2l2
Tmem1891	1.93e-23	0.884894	0.309	0.225	3.08e-19	Neutrophils	Tmem189
Sde2	1.28e-24	0.899456	0.31	0.224	2.05e-20	Neutrophils	Sde2
Neat12	5.38e-25	0.753892	0.375	0.291	8.61e-21	Neutrophils	Neat1
Tlr22	1.54e-25	0.833525	0.256	0.159	2.47e-21	Neutrophils	Tlr2
Glrx	1.75e-26	0.919336	0.339	0.248	2.8e-22	Neutrophils	Glrx
Ppp1r15a1	1.3e-26	0.70303	0.55	0.542	2.08e-22	Neutrophils	Ppp1r15a
Isg20	8.66e-28	0.898338	0.275	0.17	1.39e-23	Neutrophils	Isg20
Chd7	4.55e-29	0.843477	0.414	0.337	7.29e-25	Neutrophils	Chd7
Selenok	1.52e-29	0.683678	0.573	0.623	2.44e-25	Neutrophils	Selenok
Pde4b1	8.45e-30	0.752157	0.5	0.462	1.35e-25	Neutrophils	Pde4b
Marcksl11	4.8e-30	0.944366	0.394	0.286	7.69e-26	Neutrophils	Marcksl1
Tgif1	4.38e-30	0.965225	0.29	0.187	7.02e-26	Neutrophils	Tgif1
Gla	4.03e-30	0.972946	0.273	0.168	6.46e-26	Neutrophils	Gla
Ccl41	1.32e-30	1.71498	0.49	0.408	2.12e-26	Neutrophils	Ccl4
Ero1l1	2.97e-31	1.11129	0.29	0.176	4.76e-27	Neutrophils	Ero1l
Isg151	9.98e-32	1.32863	0.508	0.442	1.6e-27	Neutrophils	Isg15
Rhog1	1.1e-32	0.831455	0.517	0.503	1.76e-28	Neutrophils	Rhog
Cdkn1a2	1.53e-33	0.920882	0.547	0.482	2.44e-29	Neutrophils	Cdkn1a
Ndel1	3.02e-34	1.01845	0.339	0.235	4.84e-30	Neutrophils	Ndel1
Zfp361	7.17e-35	0.724627	0.624	0.562	1.15e-30	Neutrophils	Zfp36
Spp11	3.79e-36	1.30585	0.29	0.156	6.06e-32	Neutrophils	Spp1
Sat12	3.12e-36	0.5878	0.603	0.544	4.99e-32	Neutrophils	Sat1
Ptafr2	2.71e-36	0.915239	0.275	0.155	4.33e-32	Neutrophils	Ptafr
Bnip31	5.75e-38	1.09256	0.268	0.143	9.2e-34	Neutrophils	Bnip3
Btg1	1.57e-38	0.500268	0.759	0.774	2.51e-34	Neutrophils	Btg1
Lilrb4a2	2.22e-39	0.921446	0.282	0.156	3.56e-35	Neutrophils	Lilrb4a
Cd632	9.99e-40	0.71847	0.349	0.194	1.6e-35	Neutrophils	Cd63
Ninj12	5e-40	0.908992	0.462	0.351	8e-36	Neutrophils	Ninj1
Pla2g72	2.21e-40	0.874548	0.306	0.171	3.53e-36	Neutrophils	Pla2g7
Plin22	2.61e-42	0.689177	0.543	0.398	4.18e-38	Neutrophils	Plin2
Slfn22	2.37e-42	0.660363	0.597	0.489	3.79e-38	Neutrophils	Slfn2
Ehd11	8.91e-44	0.852946	0.496	0.404	1.43e-39	Neutrophils	Ehd1
Cstb1	4.17e-44	1.03735	0.595	0.525	6.68e-40	Neutrophils	Cstb
Atp6v0c2	2.94e-44	0.873439	0.604	0.552	4.7e-40	Neutrophils	Atp6v0c
Basp12	1.38e-48	0.874027	0.524	0.385	2.21e-44	Neutrophils	Basp1
Atp6v1g1	3.58e-49	0.850259	0.559	0.521	5.73e-45	Neutrophils	Atp6v1g1
Map1lc3b	7.24e-50	0.920769	0.587	0.576	1.16e-45	Neutrophils	Map1lc3b
Lcp1	2.74e-54	0.789926	0.645	0.644	4.39e-50	Neutrophils	Lcp1
Snap23	2.9e-55	1.12135	0.335	0.184	4.64e-51	Neutrophils	Snap23
Snx20	1.92e-55	1.04948	0.468	0.345	3.07e-51	Neutrophils	Snx20
Actg12	1.2e-55	0.702016	0.902	0.933	1.93e-51	Neutrophils	Actg1
Fcgr32	5.84e-56	0.936205	0.413	0.252	9.35e-52	Neutrophils	Fcgr3
Tnfaip2	1.08e-56	1.21069	0.303	0.144	1.73e-52	Neutrophils	Tnfaip2
Adipor1	5.24e-57	1.07982	0.423	0.28	8.39e-53	Neutrophils	Adipor1
Tiparp	4.35e-58	1.13626	0.43	0.282	6.96e-54	Neutrophils	Tiparp
Btg2	2.95e-58	0.885855	0.582	0.484	4.73e-54	Neutrophils	Btg2
Pnrc1	1.42e-66	0.879239	0.65	0.604	2.27e-62	Neutrophils	Pnrc1
Adam81	3.42e-68	1.05121	0.44	0.256	5.47e-64	Neutrophils	Adam8
Rab7	2.03e-69	1.15196	0.492	0.354	3.25e-65	Neutrophils	Rab7
2810474O19Rik	2.99e-70	1.08023	0.505	0.344	4.79e-66	Neutrophils	2810474O19Rik
Entpd1	4.37e-74	1.18723	0.3	0.124	6.99e-70	Neutrophils	Entpd1
Gadd45b	5.7e-75	1.35375	0.566	0.423	9.13e-71	Neutrophils	Gadd45b
Rabgef1	1.48e-75	1.04398	0.26	0.092	2.37e-71	Neutrophils	Rabgef1
Slfn11	1.49e-77	1.24057	0.344	0.155	2.38e-73	Neutrophils	Slfn1
S100a61	5.04e-78	0.838169	0.856	0.752	8.07e-74	Neutrophils	S100a6
Tpd522	4.28e-78	1.06535	0.522	0.358	6.86e-74	Neutrophils	Tpd52
Cyp4f181	6.34e-79	1.24064	0.324	0.136	1.01e-74	Neutrophils	Cyp4f18
Cd442	1.76e-81	0.985268	0.614	0.463	2.82e-77	Neutrophils	Cd44
Osm2	1.35e-81	1.32227	0.383	0.182	2.16e-77	Neutrophils	Osm
H3f3b1	3.7e-82	0.622857	0.957	0.963	5.93e-78	Neutrophils	H3f3b
Gsr1	4.61e-84	1.15938	0.334	0.14	7.37e-80	Neutrophils	Gsr
Ptgs21	4.59e-85	1.14622	0.407	0.185	7.36e-81	Neutrophils	Ptgs2
Fcer1g2	1.54e-86	0.50734	0.916	0.606	2.46e-82	Neutrophils	Fcer1g
Hilpda	4.61e-93	1.94378	0.495	0.291	7.38e-89	Neutrophils	Hilpda
Junb1	7.49e-95	0.814819	0.794	0.725	1.2e-90	Neutrophils	Junb
Mcl12	4.43e-98	0.903067	0.707	0.576	7.1e-94	Neutrophils	Mcl1
Rnf1492	1.15e-101	1.15833	0.525	0.304	1.84e-97	Neutrophils	Rnf149
Slfn41	1.08e-102	1.23694	0.308	0.098	1.72e-98	Neutrophils	Slfn4
Card192	1.56e-106	1.41082	0.576	0.37	2.49e-102	Neutrophils	Card19
Egr11	1.54e-107	1.29034	0.496	0.243	2.46e-103	Neutrophils	Egr1
Alox5ap1	6.56e-108	1.15995	0.65	0.437	1.05e-103	Neutrophils	Alox5ap
H3f3a1	3.82e-109	0.618763	0.883	0.84	6.12e-105	Neutrophils	H3f3a
Nudt4	4.14e-110	1.23086	0.302	0.092	6.63e-106	Neutrophils	Nudt4
Wfdc171	9.31e-118	1.85871	0.603	0.375	1.49e-113	Neutrophils	Wfdc17
Arg2	5.88e-125	1.12382	0.257	0.059	9.41e-121	Neutrophils	Arg2
Cd300lf1	5.52e-126	1.2821	0.39	0.143	8.84e-122	Neutrophils	Cd300lf
Slc16a32	5.42e-126	1.35435	0.517	0.258	8.68e-122	Neutrophils	Slc16a3
Mcemp11	2.2e-126	1.42705	0.349	0.113	3.53e-122	Neutrophils	Mcemp1
Ifitm22	2.14e-129	1.11409	0.735	0.478	3.43e-125	Neutrophils	Ifitm2
Thbs12	7.62e-130	0.822543	0.669	0.31	1.22e-125	Neutrophils	Thbs1
Rab202	4.49e-130	1.26278	0.441	0.18	7.18e-126	Neutrophils	Rab20
Gabarap1	4.09e-132	0.82153	0.816	0.711	6.55e-128	Neutrophils	Gabarap
Pim11	1.56e-132	0.919095	0.79	0.675	2.5e-128	Neutrophils	Pim1
Hp1	4.78e-146	1.42693	0.364	0.103	7.65e-142	Neutrophils	Hp
Samsn11	7.74e-147	1.3185	0.578	0.299	1.24e-142	Neutrophils	Samsn1
Nlrp31	2.37e-147	1.46574	0.502	0.218	3.79e-143	Neutrophils	Nlrp3
Fxyd51	7.81e-155	0.850791	0.881	0.79	1.25e-150	Neutrophils	Fxyd5
Ftl12	3.16e-155	0.864815	0.981	0.905	5.06e-151	Neutrophils	Ftl1
Pglyrp11	4.84e-156	1.73482	0.489	0.193	7.75e-152	Neutrophils	Pglyrp1
Prdx52	1.13e-158	1.12756	0.766	0.555	1.81e-154	Neutrophils	Prdx5
Plek1	1.02e-165	1.34957	0.711	0.482	1.63e-161	Neutrophils	Plek
Cd300ld	2.9e-170	1.50292	0.396	0.115	4.65e-166	Neutrophils	Cd300ld
Ccrl21	2.45e-170	1.90891	0.552	0.246	3.92e-166	Neutrophils	Ccrl2
Plaur1	8.7e-174	1.48818	0.582	0.274	1.39e-169	Neutrophils	Plaur
Lmnb1	2.28e-175	1.58559	0.654	0.394	3.65e-171	Neutrophils	Lmnb1
Eif1	2.44e-178	0.659972	0.974	0.958	3.91e-174	Neutrophils	Eif1
Trib11	1.11e-180	1.36068	0.625	0.317	1.78e-176	Neutrophils	Trib1
Litaf	4.77e-182	1.23833	0.739	0.524	7.64e-178	Neutrophils	Litaf
Ccl62	4.69e-183	1.34082	0.692	0.325	7.51e-179	Neutrophils	Ccl6
Lilr4b2	2.36e-184	1.27906	0.684	0.377	3.78e-180	Neutrophils	Lilr4b
S100a111	2.11e-186	1.4481	0.831	0.711	3.38e-182	Neutrophils	S100a11
Plk3	7.62e-197	1.52984	0.389	0.095	1.22e-192	Neutrophils	Plk3
Malat11	2.16e-199	0.688896	0.995	0.981	3.45e-195	Neutrophils	Malat1
Il1rn1	9.42e-208	1.81444	0.595	0.231	1.51e-203	Neutrophils	Il1rn
Mxd1	2.48e-212	1.6608	0.65	0.325	3.97e-208	Neutrophils	Mxd1
C5ar11	5.54e-217	1.52669	0.542	0.186	8.87e-213	Neutrophils	C5ar1
Cd33	2.12e-217	1.25879	0.262	0.032	3.39e-213	Neutrophils	Cd33
Ier32	1.87e-225	1.66202	0.76	0.375	3e-221	Neutrophils	Ier3
Upp1	2.14e-230	1.73653	0.345	0.06	3.43e-226	Neutrophils	Upp1
Nfkbiz1	1.55e-231	1.44594	0.734	0.39	2.48e-227	Neutrophils	Nfkbiz
Ets2	3.08e-235	1.55161	0.627	0.258	4.93e-231	Neutrophils	Ets2
Dusp11	2.89e-247	1.44525	0.851	0.558	4.62e-243	Neutrophils	Dusp1
Smox	2.58e-256	1.58714	0.662	0.275	4.14e-252	Neutrophils	Smox
Sgms2	1.59e-259	1.46204	0.304	0.037	2.54e-255	Neutrophils	Sgms2
Ccr1	3.9e-266	1.66596	0.56	0.171	6.24e-262	Neutrophils	Ccr1
Ifitm11	3.08e-268	1.77223	0.616	0.184	4.93e-264	Neutrophils	Ifitm1
Tnfrsf23	5.51e-278	1.46998	0.31	0.035	8.82e-274	Neutrophils	Tnfrsf23
Ccl3	5.23e-305	3.02205	0.701	0.274	8.38e-301	Neutrophils	Ccl3
S100a9	0	5.50824	0.923	0.028	0	Neutrophils	S100a9
S100a8	0	5.01787	0.91	0.027	0	Neutrophils	S100a8
Retnlg	0	3.98197	0.553	0.01	0	Neutrophils	Retnlg
G0s2	0	3.80853	0.747	0.016	0	Neutrophils	G0s2
Cxcl3	0	2.96715	0.62	0.098	0	Neutrophils	Cxcl3
Acod1	0	2.81387	0.794	0.105	0	Neutrophils	Acod1
Hdc	0	2.75019	0.694	0.042	0	Neutrophils	Hdc
Gm5483	0	2.73423	0.286	0.004	0	Neutrophils	Gm5483
Cxcl2	0	2.73063	0.994	0.43	0	Neutrophils	Cxcl2
Lcn2	0	2.71396	0.435	0.009	0	Neutrophils	Lcn2
Slpi	0	2.6718	0.777	0.16	0	Neutrophils	Slpi
Hcar2	0	2.56005	0.583	0.039	0	Neutrophils	Hcar2
Trem1	0	2.50575	0.651	0.089	0	Neutrophils	Trem1
Slc7a11	0	2.42309	0.693	0.123	0	Neutrophils	Slc7a11
Cd9	0	2.42242	0.84	0.238	0	Neutrophils	Cd9
Stfa2l1	0	2.22296	0.273	0.003	0	Neutrophils	Stfa2l1
Il1r21	0	2.20218	0.731	0.191	0	Neutrophils	Il1r2
Wfdc21	0	2.02213	0.349	0.004	0	Neutrophils	Wfdc21
Clec4e1	0	2.01263	0.859	0.261	0	Neutrophils	Clec4e
Msrb11	0	1.99868	0.767	0.332	0	Neutrophils	Msrb1
Clec4d1	0	1.99692	0.791	0.215	0	Neutrophils	Clec4d
Lrg1	0	1.95122	0.344	0.018	0	Neutrophils	Lrg1
Il1b2	0	1.927	0.938	0.402	0	Neutrophils	Il1b
Grina	0	1.91618	0.736	0.324	0	Neutrophils	Grina
Csf3r	0	1.80625	0.423	0.051	0	Neutrophils	Csf3r
Cd24a	0	1.78387	0.569	0.141	0	Neutrophils	Cd24a
Gadd45a	0	1.78238	0.435	0.07	0	Neutrophils	Gadd45a
Csf1	0	1.7414	0.326	0.023	0	Neutrophils	Csf1
Srgn	0	1.67658	0.992	0.909	0	Neutrophils	Srgn
Ankrd33b	0	1.65785	0.427	0.069	0	Neutrophils	Ankrd33b
Cd142	0	1.65758	0.873	0.345	0	Neutrophils	Cd14
Il1f9	0	1.59946	0.258	0.005	0	Neutrophils	Il1f9
Cebpb2	0	1.5901	0.861	0.435	0	Neutrophils	Cebpb
Fth11	0	1.52934	0.999	0.979	0	Neutrophils	Fth1
Nfkbia1	0	1.51726	0.969	0.806	0	Neutrophils	Nfkbia
Rdh12	0	1.47333	0.26	0.009	0	Neutrophils	Rdh12
AC110211.1	0	1.46551	0.289	0.006	0	Neutrophils	AC110211.1
Mmp9	0	1.45606	0.279	0.004	0	Neutrophils	Mmp9
Tyrobp1	0	1.23061	0.97	0.615	0	Neutrophils	Tyrobp
Slamf71	2.14e-07	0.285163	0.258	0.189	0.00342475	Monocytes	Slamf7
Ak2	8.39e-18	0.261072	0.385	0.246	1.34e-13	Monocytes	Ak2
Ifi203	3.35e-18	0.310094	0.37	0.231	5.37e-14	Monocytes	Ifi203
Pycard1	8.73e-19	0.271983	0.472	0.314	1.4e-14	Monocytes	Pycard
Psma4	1.59e-19	0.253159	0.458	0.301	2.54e-15	Monocytes	Psma4
Fgl2	3.86e-20	0.255286	0.295	0.163	6.18e-16	Monocytes	Fgl2
Lamtor41	5.93e-21	0.263619	0.45	0.286	9.49e-17	Monocytes	Lamtor4
Arpc4	2.34e-21	0.260577	0.649	0.464	3.75e-17	Monocytes	Arpc4
Ccr51	2.02e-21	0.282502	0.353	0.207	3.23e-17	Monocytes	Ccr5
Actr2	6.85e-22	0.25656	0.515	0.338	1.1e-17	Monocytes	Actr2
Trappc2l1	4.88e-22	0.27128	0.362	0.214	7.81e-18	Monocytes	Trappc2l
Smdt11	2.26e-22	0.253104	0.713	0.502	3.62e-18	Monocytes	Smdt1
Ywhab	2.14e-22	0.278157	0.505	0.335	3.43e-18	Monocytes	Ywhab
Gusb1	1.58e-23	0.295048	0.299	0.16	2.54e-19	Monocytes	Gusb
Fam96a	1.3e-23	0.283766	0.413	0.253	2.09e-19	Monocytes	Fam96a
Znhit11	4.92e-24	0.284341	0.384	0.228	7.88e-20	Monocytes	Znhit1
H2-T231	3.03e-24	0.28375	0.478	0.3	4.85e-20	Monocytes	H2-T23
Camk2d	1.71e-24	0.272459	0.254	0.123	2.74e-20	Monocytes	Camk2d
Klf41	1.6e-24	0.354196	0.308	0.163	2.56e-20	Monocytes	Klf4
Cnih41	9.16e-25	0.250018	0.425	0.25	1.47e-20	Monocytes	Cnih4
Tle3	6.74e-25	0.259105	0.311	0.161	1.08e-20	Monocytes	Tle3
Gch1	5.95e-25	0.251849	0.385	0.215	9.53e-21	Monocytes	Gch1
Rnf19b	4.2e-25	0.269964	0.389	0.22	6.72e-21	Monocytes	Rnf19b
Capns11	4.12e-25	0.259273	0.517	0.328	6.6e-21	Monocytes	Capns1
Stat11	1.13e-25	0.276502	0.484	0.295	1.81e-21	Monocytes	Stat1
Rac1	9.35e-26	0.267713	0.779	0.585	1.5e-21	Monocytes	Rac1
Ogfr	7.1e-26	0.274551	0.28	0.14	1.14e-21	Monocytes	Ogfr
Mvp1	6.02e-26	0.259758	0.323	0.17	9.64e-22	Monocytes	Mvp
Ppp1r15b	2.84e-26	0.282367	0.31	0.16	4.55e-22	Monocytes	Ppp1r15b
Sp100	1.6e-26	0.286499	0.46	0.273	2.56e-22	Monocytes	Sp100
Acap2	1.25e-26	0.251092	0.263	0.126	2e-22	Monocytes	Acap2
Ccnd3	1.12e-26	0.257023	0.348	0.185	1.8e-22	Monocytes	Ccnd3
Bin2	7.71e-27	0.338428	0.372	0.207	1.23e-22	Monocytes	Bin2
Nfil3	3.91e-27	0.269279	0.415	0.237	6.26e-23	Monocytes	Nfil3
Ifi35	3.82e-27	0.287278	0.352	0.191	6.12e-23	Monocytes	Ifi35
Ikbkb1	3.82e-27	0.338013	0.386	0.219	6.11e-23	Monocytes	Ikbkb
Sec61g1	2.95e-27	0.280927	0.804	0.583	4.73e-23	Monocytes	Sec61g
Ahnak1	2.25e-27	0.254947	0.698	0.492	3.61e-23	Monocytes	Ahnak
Siva1	1.72e-27	0.260546	0.415	0.234	2.75e-23	Monocytes	Siva1
Tubb61	1.4e-27	0.278712	0.344	0.183	2.24e-23	Monocytes	Tubb6
Cyth1	1.05e-27	0.251186	0.422	0.238	1.68e-23	Monocytes	Cyth1
Mrpl521	7.32e-28	0.28979	0.774	0.536	1.17e-23	Monocytes	Mrpl52
Man2b11	6.74e-28	0.341558	0.368	0.204	1.08e-23	Monocytes	Man2b1
Nampt1	6.68e-28	0.319703	0.328	0.172	1.07e-23	Monocytes	Nampt
Irf11	6.05e-28	0.344747	0.396	0.218	9.69e-24	Monocytes	Irf1
Chka1	3.21e-28	0.341887	0.353	0.189	5.14e-24	Monocytes	Chka
Actr31	1.28e-28	0.310738	0.78	0.556	2.05e-24	Monocytes	Actr3
Tcirg11	1.07e-28	0.254435	0.372	0.198	1.72e-24	Monocytes	Tcirg1
Ifnar21	1.02e-28	0.256095	0.52	0.313	1.63e-24	Monocytes	Ifnar2
Iqgap11	1e-28	0.26002	0.828	0.599	1.61e-24	Monocytes	Iqgap1
Ssfa22	8.89e-29	0.286501	0.317	0.16	1.42e-24	Monocytes	Ssfa2
Nfkbie1	7.13e-29	0.282553	0.369	0.198	1.14e-24	Monocytes	Nfkbie
Eps81	6.89e-29	0.280741	0.296	0.145	1.1e-24	Monocytes	Eps8
Sema4d	6.35e-29	0.296636	0.378	0.2	1.02e-24	Monocytes	Sema4d
Mndal	2.96e-29	0.40395	0.392	0.22	4.74e-25	Monocytes	Mndal
Fem1c	2.48e-29	0.30808	0.374	0.201	3.98e-25	Monocytes	Fem1c
Map3k8	2.11e-29	0.319968	0.364	0.19	3.38e-25	Monocytes	Map3k8
Rap1b	1.48e-29	0.28559	0.701	0.476	2.37e-25	Monocytes	Rap1b
Ifngr2	8.27e-30	0.287268	0.278	0.13	1.32e-25	Monocytes	Ifngr2
Bri31	7.33e-30	0.264969	0.623	0.392	1.17e-25	Monocytes	Bri3
Gpcpd1	6.8e-30	0.35933	0.295	0.143	1.09e-25	Monocytes	Gpcpd1
Plec1	6.31e-30	0.300452	0.425	0.237	1.01e-25	Monocytes	Plec
Asah1	6.22e-30	0.35546	0.298	0.147	9.95e-26	Monocytes	Asah1
H2-DMa1	5.79e-30	0.266774	0.512	0.285	9.27e-26	Monocytes	H2-DMa
Itgal	5.69e-30	0.345244	0.354	0.177	9.11e-26	Monocytes	Itgal
Rara	5.42e-30	0.251704	0.267	0.121	8.68e-26	Monocytes	Rara
Tmsb101	3.76e-30	0.294267	0.988	0.897	6.02e-26	Monocytes	Tmsb10
Synj11	2.71e-30	0.326662	0.307	0.152	4.34e-26	Monocytes	Synj1
Tm2d2	1.12e-30	0.30741	0.341	0.176	1.79e-26	Monocytes	Tm2d2
Cib1	1.04e-30	0.335726	0.343	0.176	1.66e-26	Monocytes	Cib1
Anxa11	9.19e-31	0.301032	0.37	0.192	1.47e-26	Monocytes	Anxa1
Sdc31	2.35e-31	0.347533	0.361	0.189	3.76e-27	Monocytes	Sdc3
Atp1b3	1.55e-31	0.283791	0.631	0.397	2.49e-27	Monocytes	Atp1b3
Diaph1	6.84e-32	0.253066	0.577	0.349	1.1e-27	Monocytes	Diaph1
Akr1a11	2.91e-32	0.267006	0.746	0.491	4.66e-28	Monocytes	Akr1a1
Phf11b1	1.58e-32	0.450508	0.316	0.158	2.54e-28	Monocytes	Phf11b
Fes	7.07e-33	0.315109	0.253	0.11	1.13e-28	Monocytes	Fes
Zyx1	5.22e-33	0.336018	0.55	0.34	8.36e-29	Monocytes	Zyx
Prr13	4.82e-33	0.362014	0.615	0.401	7.71e-29	Monocytes	Prr13
Soat11	3.18e-33	0.264293	0.299	0.137	5.09e-29	Monocytes	Soat1
Hmgcl	2.06e-33	0.296077	0.283	0.128	3.3e-29	Monocytes	Hmgcl
Slc25a5	1.06e-33	0.33036	0.72	0.483	1.7e-29	Monocytes	Slc25a5
Plekho21	8.04e-34	0.308919	0.378	0.194	1.29e-29	Monocytes	Plekho2
Clec12a1	5.69e-34	0.300643	0.275	0.119	9.11e-30	Monocytes	Clec12a
Tmed5	4.98e-34	0.352794	0.549	0.337	7.98e-30	Monocytes	Tmed5
Tln1	2.53e-34	0.335269	0.684	0.458	4.05e-30	Monocytes	Tln1
Lrrfip1	2.03e-34	0.325527	0.55	0.333	3.25e-30	Monocytes	Lrrfip1
Kdm7a	1.6e-34	0.329932	0.364	0.181	2.56e-30	Monocytes	Kdm7a
Rhog	8.18e-35	0.258975	0.725	0.486	1.31e-30	Monocytes	Rhog
Lrpap11	7.42e-35	0.304974	0.344	0.168	1.19e-30	Monocytes	Lrpap1
Ppp2r5a	3.78e-35	0.341246	0.384	0.195	6.05e-31	Monocytes	Ppp2r5a
Ifrd11	2.55e-35	0.304687	0.769	0.525	4.08e-31	Monocytes	Ifrd1
Hexa1	2.29e-35	0.2825	0.434	0.226	3.67e-31	Monocytes	Hexa
Clic42	1.87e-35	0.343171	0.489	0.278	2.99e-31	Monocytes	Clic4
Parp14	1.09e-35	0.369357	0.282	0.123	1.74e-31	Monocytes	Parp14
Atp6v0b1	1.02e-35	0.299742	0.731	0.477	1.63e-31	Monocytes	Atp6v0b
Aif11	6.65e-36	0.413809	0.423	0.219	1.06e-31	Monocytes	Aif1
Cd862	5.58e-36	0.341019	0.372	0.186	8.93e-32	Monocytes	Cd86
Mfsd11	4.63e-36	0.310604	0.384	0.194	7.41e-32	Monocytes	Mfsd1
Pid11	2.44e-36	0.328297	0.331	0.152	3.91e-32	Monocytes	Pid1
Xbp1	2.38e-36	0.329467	0.421	0.222	3.81e-32	Monocytes	Xbp1
Cdk2ap2	2.18e-36	0.333423	0.676	0.435	3.48e-32	Monocytes	Cdk2ap2
Sh3bgrl2	1.74e-36	0.33911	0.433	0.23	2.79e-32	Monocytes	Sh3bgrl
Skap21	1.38e-36	0.363392	0.394	0.204	2.22e-32	Monocytes	Skap2
Rasa4	1.26e-36	0.375606	0.267	0.115	2.01e-32	Monocytes	Rasa4
Cmpk11	1.09e-36	0.380476	0.437	0.24	1.75e-32	Monocytes	Cmpk1
Creg11	1.05e-36	0.308308	0.467	0.252	1.68e-32	Monocytes	Creg1
Tmem106a1	6.85e-37	0.332046	0.343	0.161	1.1e-32	Monocytes	Tmem106a
Csrnp1	6.15e-37	0.267524	0.53	0.294	9.85e-33	Monocytes	Csrnp1
Ubc	5.11e-37	0.298896	0.963	0.823	8.18e-33	Monocytes	Ubc
Evl	4.83e-37	0.337837	0.284	0.121	7.74e-33	Monocytes	Evl
Anxa22	1.1e-37	0.34112	0.811	0.575	1.77e-33	Monocytes	Anxa2
Vamp8	9.49e-38	0.356817	0.746	0.501	1.52e-33	Monocytes	Vamp8
Rap1a	8.04e-38	0.385984	0.561	0.336	1.29e-33	Monocytes	Rap1a
Atp6v1b21	3.86e-38	0.289465	0.447	0.231	6.18e-34	Monocytes	Atp6v1b2
Tmem14c	8.17e-39	0.401603	0.569	0.343	1.31e-34	Monocytes	Tmem14c
Mrpl33	6.22e-39	0.311643	0.663	0.421	9.96e-35	Monocytes	Mrpl33
Glud1	1.81e-39	0.391248	0.521	0.302	2.9e-35	Monocytes	Glud1
Capza21	1.6e-39	0.371445	0.594	0.362	2.56e-35	Monocytes	Capza2
Tgfb1	1.38e-39	0.3717	0.534	0.301	2.21e-35	Monocytes	Tgfb1
Mdm21	1.09e-39	0.337674	0.429	0.218	1.75e-35	Monocytes	Mdm2
Laptm4a	8.63e-40	0.355447	0.48	0.263	1.38e-35	Monocytes	Laptm4a
Tor1aip1	3.94e-40	0.342005	0.452	0.235	6.31e-36	Monocytes	Tor1aip1
Arf2	2.87e-40	0.364843	0.302	0.129	4.6e-36	Monocytes	Arf2
Crip11	2.48e-40	0.349983	0.877	0.663	3.97e-36	Monocytes	Crip1
Arpc2	2.25e-40	0.309538	0.934	0.742	3.6e-36	Monocytes	Arpc2
Rilpl21	2.08e-40	0.381792	0.55	0.314	3.32e-36	Monocytes	Rilpl2
Trim30a	1.63e-40	0.381269	0.389	0.19	2.61e-36	Monocytes	Trim30a
Coro1b1	5.3e-41	0.365858	0.529	0.298	8.49e-37	Monocytes	Coro1b
Lgals3bp1	4.81e-41	0.367671	0.415	0.206	7.7e-37	Monocytes	Lgals3bp
Pilra	2.71e-41	0.297537	0.263	0.1	4.34e-37	Monocytes	Pilra
Txnrd12	2.07e-41	0.36022	0.386	0.184	3.31e-37	Monocytes	Txnrd1
Bcl3	1.27e-41	0.32579	0.262	0.1	2.04e-37	Monocytes	Bcl3
Anxa51	1.1e-41	0.298634	0.679	0.395	1.76e-37	Monocytes	Anxa5
Sell	7.93e-42	0.324768	0.329	0.136	1.27e-37	Monocytes	Sell
S100a6	6.68e-42	0.253981	0.938	0.749	1.07e-37	Monocytes	S100a6
Ehd41	5.2e-42	0.433669	0.347	0.16	8.33e-38	Monocytes	Ehd4
Psmb101	3.67e-42	0.386812	0.571	0.332	5.87e-38	Monocytes	Psmb10
Cycs1	2.33e-42	0.388103	0.693	0.438	3.74e-38	Monocytes	Cycs
Sbno2	4.34e-43	0.370132	0.319	0.134	6.94e-39	Monocytes	Sbno2
Prdx11	3.53e-43	0.343846	0.784	0.514	5.65e-39	Monocytes	Prdx1
Lcp2	2.81e-43	0.406887	0.349	0.155	4.49e-39	Monocytes	Lcp2
Stap11	2.72e-43	0.454308	0.345	0.154	4.36e-39	Monocytes	Stap1
Gnb2	1.21e-43	0.370629	0.709	0.443	1.94e-39	Monocytes	Gnb2
Myo1f	1.15e-43	0.348526	0.328	0.14	1.85e-39	Monocytes	Myo1f
Rbm7	9.67e-44	0.347045	0.361	0.161	1.55e-39	Monocytes	Rbm7
Jun	8.83e-44	0.387252	0.733	0.462	1.41e-39	Monocytes	Jun
Ptp4a1	7.8e-44	0.328759	0.635	0.371	1.25e-39	Monocytes	Ptp4a1
Sppl2a	3.81e-44	0.394375	0.345	0.156	6.1e-40	Monocytes	Sppl2a
Erp291	3.26e-44	0.413188	0.639	0.386	5.22e-40	Monocytes	Erp29
Itgam1	2.09e-44	0.27803	0.37	0.16	3.34e-40	Monocytes	Itgam
Ggh	1.71e-44	0.335328	0.321	0.136	2.73e-40	Monocytes	Ggh
H2-D1	1.21e-44	0.261401	0.991	0.913	1.94e-40	Monocytes	H2-D1
Nfkbib1	8.41e-45	0.382491	0.54	0.297	1.35e-40	Monocytes	Nfkbib
Rab201	8.24e-45	0.274984	0.422	0.19	1.32e-40	Monocytes	Rab20
Syk1	3.98e-45	0.326987	0.545	0.287	6.37e-41	Monocytes	Syk
Stk40	2.79e-45	0.335085	0.339	0.143	4.46e-41	Monocytes	Stk40
Id3	2.64e-45	0.48734	0.296	0.116	4.22e-41	Monocytes	Id3
Itm2b1	2.37e-45	0.331728	0.921	0.733	3.8e-41	Monocytes	Itm2b
Ppt1	2.1e-45	0.323179	0.354	0.153	3.37e-41	Monocytes	Ppt1
Myd88	2.01e-45	0.372916	0.3	0.122	3.21e-41	Monocytes	Myd88
Mapk61	8.44e-46	0.311225	0.366	0.16	1.35e-41	Monocytes	Mapk6
Casp4	4.16e-46	0.296348	0.251	0.088	6.66e-42	Monocytes	Casp4
Snx10	3.75e-46	0.321523	0.271	0.101	6.01e-42	Monocytes	Snx10
Hcls1	2.46e-46	0.409873	0.583	0.331	3.93e-42	Monocytes	Hcls1
Chmp4b	2.28e-46	0.43621	0.688	0.432	3.66e-42	Monocytes	Chmp4b
Itga51	1.47e-46	0.357936	0.282	0.107	2.36e-42	Monocytes	Itga5
Rnpep	1.28e-46	0.365035	0.324	0.136	2.06e-42	Monocytes	Rnpep
Junb	1.02e-46	0.315644	0.922	0.717	1.64e-42	Monocytes	Junb
Arhgdib	9.57e-47	0.404737	0.812	0.588	1.53e-42	Monocytes	Arhgdib
Mcl11	8.48e-47	0.318318	0.847	0.569	1.36e-42	Monocytes	Mcl1
Ifi47	2.57e-47	0.530058	0.303	0.121	4.11e-43	Monocytes	Ifi47
Ctsh2	1.99e-47	0.297253	0.683	0.366	3.19e-43	Monocytes	Ctsh
Sirpa1	1.79e-47	0.349369	0.419	0.192	2.87e-43	Monocytes	Sirpa
Capzb	1.52e-47	0.390277	0.853	0.595	2.43e-43	Monocytes	Capzb
Pomp1	5.38e-48	0.435275	0.738	0.472	8.62e-44	Monocytes	Pomp
Msr11	4.89e-48	0.350868	0.27	0.096	7.83e-44	Monocytes	Msr1
Gsdmd	2.14e-48	0.369031	0.341	0.144	3.43e-44	Monocytes	Gsdmd
Lgals9	1.42e-48	0.440462	0.481	0.244	2.27e-44	Monocytes	Lgals9
Slc11a11	8.07e-49	0.35445	0.332	0.132	1.29e-44	Monocytes	Slc11a1
1110008F13Rik	7.37e-49	0.405635	0.573	0.317	1.18e-44	Monocytes	1110008F13Rik
Slfn4	4.88e-49	0.262559	0.296	0.106	7.81e-45	Monocytes	Slfn4
Ist11	4.48e-49	0.366505	0.483	0.238	7.18e-45	Monocytes	Ist1
Fam49b1	1.79e-49	0.422323	0.631	0.366	2.86e-45	Monocytes	Fam49b
2310022A10Rik	6.5e-50	0.355272	0.253	0.086	1.04e-45	Monocytes	2310022A10Rik
Arl5c1	5.11e-50	0.418836	0.315	0.121	8.18e-46	Monocytes	Arl5c
Dusp3	3.75e-50	0.405265	0.299	0.116	6.01e-46	Monocytes	Dusp3
Zfand51	2.92e-50	0.443337	0.565	0.307	4.68e-46	Monocytes	Zfand5
Rbms11	2.52e-50	0.340941	0.657	0.371	4.03e-46	Monocytes	Rbms1
Sgk11	1.81e-50	0.470884	0.39	0.171	2.9e-46	Monocytes	Sgk1
Sdcbp1	1.22e-50	0.354735	0.737	0.437	1.96e-46	Monocytes	Sdcbp
Psma71	8.89e-51	0.43103	0.783	0.522	1.42e-46	Monocytes	Psma7
Pgd1	7.03e-51	0.33638	0.349	0.142	1.13e-46	Monocytes	Pgd
Kdm6b1	6e-51	0.341445	0.638	0.346	9.61e-47	Monocytes	Kdm6b
Xaf1	4.47e-51	0.42395	0.313	0.122	7.16e-47	Monocytes	Xaf1
Svil	2.6e-51	0.368726	0.284	0.102	4.17e-47	Monocytes	Svil
Fam129b1	1.4e-51	0.400259	0.339	0.136	2.25e-47	Monocytes	Fam129b
Trib1	7.81e-52	0.278272	0.628	0.326	1.25e-47	Monocytes	Trib1
Cd300lf	3.91e-52	0.303419	0.377	0.152	6.25e-48	Monocytes	Cd300lf
Ccdc86	9.43e-53	0.42381	0.261	0.09	1.51e-48	Monocytes	Ccdc86
Atp1a1	6.35e-53	0.47505	0.548	0.293	1.02e-48	Monocytes	Atp1a1
H3f3b	5.17e-53	0.289217	0.997	0.96	8.28e-49	Monocytes	H3f3b
Cers6	2.87e-53	0.380635	0.266	0.091	4.6e-49	Monocytes	Cers6
Sowahc	2.35e-53	0.364212	0.262	0.088	3.77e-49	Monocytes	Sowahc
Naaa1	1.01e-53	0.380733	0.298	0.106	1.61e-49	Monocytes	Naaa
Havcr2	2.93e-54	0.46668	0.32	0.124	4.69e-50	Monocytes	Havcr2
Atp2b11	2.08e-54	0.375325	0.712	0.4	3.33e-50	Monocytes	Atp2b1
Mapkapk2	1.85e-54	0.428261	0.53	0.267	2.96e-50	Monocytes	Mapkapk2
Prkcd1	1.73e-54	0.434539	0.499	0.242	2.77e-50	Monocytes	Prkcd
Ccl21	1.48e-54	0.360505	0.447	0.187	2.36e-50	Monocytes	Ccl2
Ptpre1	8.09e-55	0.428852	0.398	0.168	1.3e-50	Monocytes	Ptpre
Efhd21	5.99e-55	0.435842	0.733	0.445	9.59e-51	Monocytes	Efhd2
Cflar1	2.68e-55	0.455125	0.549	0.28	4.28e-51	Monocytes	Cflar
Lrp11	5.55e-56	0.313717	0.421	0.173	8.89e-52	Monocytes	Lrp1
Neat11	1.24e-56	0.331567	0.56	0.278	1.98e-52	Monocytes	Neat1
Nadk	1.01e-56	0.398262	0.306	0.111	1.61e-52	Monocytes	Nadk
Ptafr1	3.15e-57	0.364859	0.381	0.151	5.05e-53	Monocytes	Ptafr
Ctsa1	1.69e-57	0.413571	0.648	0.343	2.71e-53	Monocytes	Ctsa
Ptpn6	7.4e-58	0.456961	0.46	0.213	1.18e-53	Monocytes	Ptpn6
Msn	6.71e-58	0.48069	0.812	0.554	1.07e-53	Monocytes	Msn
Lilrb4a1	4.49e-58	0.353967	0.385	0.151	7.19e-54	Monocytes	Lilrb4a
Lilr4b1	2.61e-58	0.252713	0.737	0.382	4.18e-54	Monocytes	Lilr4b
Fxyd5	7.84e-59	0.321387	0.971	0.786	1.26e-54	Monocytes	Fxyd5
B4galt5	5e-59	0.422351	0.325	0.119	8.01e-55	Monocytes	B4galt5
Adssl11	3.6e-59	0.414621	0.337	0.126	5.76e-55	Monocytes	Adssl1
Dusp16	2.97e-59	0.501767	0.271	0.089	4.75e-55	Monocytes	Dusp16
Trafd1	2.55e-59	0.468892	0.393	0.163	4.08e-55	Monocytes	Trafd1
Slc16a31	1.78e-59	0.343293	0.554	0.263	2.85e-55	Monocytes	Slc16a3
Plek	1.78e-59	0.325784	0.807	0.482	2.85e-55	Monocytes	Plek
Gm2a1	8.42e-60	0.372293	0.652	0.325	1.35e-55	Monocytes	Gm2a
Atp6v0c1	6.9e-60	0.388126	0.839	0.534	1.1e-55	Monocytes	Atp6v0c
Actg11	6.35e-60	0.326056	0.997	0.924	1.02e-55	Monocytes	Actg1
Bst2	4.56e-60	0.278603	0.77	0.46	7.31e-56	Monocytes	Bst2
Pitpna1	2.36e-60	0.459345	0.593	0.309	3.77e-56	Monocytes	Pitpna
Actb1	7.8e-61	0.289797	1	0.974	1.25e-56	Monocytes	Actb
Oas3	6.48e-61	0.351629	0.253	0.075	1.04e-56	Monocytes	Oas3
Il1b1	3.83e-61	0.285185	0.794	0.431	6.13e-57	Monocytes	Il1b
Cd52	1.91e-61	0.344821	0.984	0.829	3.05e-57	Monocytes	Cd52
Flna	1.2e-61	0.534127	0.615	0.332	1.91e-57	Monocytes	Flna
App1	1.08e-61	0.354928	0.591	0.282	1.72e-57	Monocytes	App
Picalm1	3.26e-62	0.446567	0.649	0.34	5.22e-58	Monocytes	Picalm
Unc93b11	5.02e-64	0.452884	0.579	0.282	8.04e-60	Monocytes	Unc93b1
Ppp1r15a	3.86e-64	0.438608	0.816	0.52	6.18e-60	Monocytes	Ppp1r15a
Tspo1	6.73e-65	0.500772	0.853	0.641	1.08e-60	Monocytes	Tspo
Ncf4	2.64e-65	0.422085	0.493	0.221	4.23e-61	Monocytes	Ncf4
Rnf2131	1.72e-65	0.576647	0.501	0.23	2.76e-61	Monocytes	Rnf213
Jarid21	1.01e-65	0.46475	0.467	0.203	1.62e-61	Monocytes	Jarid2
Ltb4r1	5.07e-66	0.400752	0.294	0.092	8.11e-62	Monocytes	Ltb4r1
Ifi213	1.99e-66	0.446254	0.259	0.075	3.18e-62	Monocytes	Ifi213
Lgmn1	1.85e-66	0.277036	0.733	0.348	2.96e-62	Monocytes	Lgmn
Ap1s2	1.43e-66	0.487468	0.278	0.087	2.3e-62	Monocytes	Ap1s2
Pim1	1.34e-66	0.362268	0.93	0.667	2.15e-62	Monocytes	Pim1
Gm14005	9.13e-67	0.331726	0.263	0.075	1.46e-62	Monocytes	Gm14005
Ier21	6.5e-67	0.583093	0.738	0.433	1.04e-62	Monocytes	Ier2
Nfkbiz	4.99e-67	0.376244	0.742	0.4	7.99e-63	Monocytes	Nfkbiz
Trim251	3.65e-67	0.524826	0.573	0.28	5.85e-63	Monocytes	Trim25
H3f3a	1.64e-67	0.38806	0.962	0.835	2.62e-63	Monocytes	H3f3a
Il10ra	1.14e-67	0.474769	0.536	0.247	1.83e-63	Monocytes	Il10ra
Ifi209	6.02e-68	0.62164	0.39	0.151	9.64e-64	Monocytes	Ifi209
Bach11	4.76e-68	0.467756	0.377	0.138	7.62e-64	Monocytes	Bach1
Tkt	8.92e-69	0.507162	0.631	0.33	1.43e-64	Monocytes	Tkt
Tlr13	1.73e-69	0.387017	0.307	0.096	2.78e-65	Monocytes	Tlr13
Grn1	1.63e-69	0.321862	0.714	0.35	2.62e-65	Monocytes	Grn
Oasl11	5.89e-70	0.640283	0.366	0.132	9.44e-66	Monocytes	Oasl1
Gpr351	5.44e-70	0.427594	0.36	0.125	8.71e-66	Monocytes	Gpr35
Rrbp11	1.59e-70	0.479787	0.778	0.45	2.54e-66	Monocytes	Rrbp1
Slc15a31	2.75e-71	0.41154	0.608	0.283	4.4e-67	Monocytes	Slc15a3
Cndp21	1.51e-71	0.553154	0.511	0.227	2.42e-67	Monocytes	Cndp2
Card191	1.35e-71	0.333274	0.709	0.366	2.15e-67	Monocytes	Card19
Acer3	9.16e-72	0.468213	0.291	0.09	1.47e-67	Monocytes	Acer3
Plaur	4.35e-72	0.348309	0.62	0.281	6.97e-68	Monocytes	Plaur
AB124611	1.14e-72	0.441314	0.374	0.132	1.83e-68	Monocytes	AB124611
Coro1a	5.58e-73	0.530859	0.923	0.716	8.93e-69	Monocytes	Coro1a
Oasl2	5.32e-73	0.502942	0.348	0.117	8.51e-69	Monocytes	Oasl2
Csf2rb3	4.33e-74	0.472543	0.638	0.301	6.93e-70	Monocytes	Csf2rb
Itgb21	2.67e-74	0.541725	0.665	0.348	4.28e-70	Monocytes	Itgb2
Irf51	8.11e-75	0.512877	0.463	0.188	1.3e-70	Monocytes	Irf5
Ucp22	4.52e-75	0.506611	0.919	0.639	7.24e-71	Monocytes	Ucp2
Xdh	1.31e-75	0.453233	0.291	0.084	2.09e-71	Monocytes	Xdh
Cd300c21	1.21e-75	0.589112	0.534	0.232	1.93e-71	Monocytes	Cd300c2
Nr4a1	3.26e-76	0.789601	0.533	0.235	5.22e-72	Monocytes	Nr4a1
Socs31	1.16e-76	0.620858	0.563	0.255	1.86e-72	Monocytes	Socs3
Osm1	3.94e-77	0.413787	0.475	0.18	6.31e-73	Monocytes	Osm
Slfn1	7.35e-78	0.402849	0.431	0.154	1.18e-73	Monocytes	Slfn1
Rsad21	5.58e-78	1.08114	0.39	0.136	8.93e-74	Monocytes	Rsad2
Igsf6	1.21e-78	0.397958	0.292	0.082	1.94e-74	Monocytes	Igsf6
Mcub1	1.09e-78	0.528734	0.354	0.12	1.75e-74	Monocytes	Mcub
Ccr2	9.26e-80	0.633677	0.455	0.178	1.48e-75	Monocytes	Ccr2
Fcgr2b1	7.75e-80	0.509842	0.571	0.241	1.24e-75	Monocytes	Fcgr2b
Nrros1	2.29e-80	0.566313	0.474	0.19	3.67e-76	Monocytes	Nrros
Dbi1	7.62e-81	0.595462	0.706	0.388	1.22e-76	Monocytes	Dbi
Plbd12	5.75e-81	0.418769	0.619	0.263	9.2e-77	Monocytes	Plbd1
Nfkbia	2.22e-81	0.343754	0.974	0.811	3.55e-77	Monocytes	Nfkbia
Ly862	7.12e-82	0.548833	0.522	0.217	1.14e-77	Monocytes	Ly86
Sem11	3.29e-82	0.464673	0.951	0.726	5.27e-78	Monocytes	Sem1
Isg15	8.58e-83	0.812818	0.755	0.424	1.37e-78	Monocytes	Isg15
S100a41	7.39e-83	0.530346	0.717	0.355	1.18e-78	Monocytes	S100a4
Rtp4	5.34e-83	0.5437	0.463	0.172	8.55e-79	Monocytes	Rtp4
Dok3	1.61e-83	0.425184	0.279	0.072	2.58e-79	Monocytes	Dok3
Pou2f2	1.15e-83	0.662021	0.331	0.099	1.84e-79	Monocytes	Pou2f2
Gbp2	2.55e-84	1.0291	0.323	0.098	4.08e-80	Monocytes	Gbp2
Adgre5	6.83e-85	0.670814	0.521	0.216	1.09e-80	Monocytes	Adgre5
Fcgr41	3.77e-85	0.618837	0.36	0.113	6.04e-81	Monocytes	Fcgr4
Rnf1491	7.84e-86	0.482277	0.665	0.299	1.26e-81	Monocytes	Rnf149
Slfn5	8.92e-87	0.613686	0.388	0.129	1.43e-82	Monocytes	Slfn5
Taldo11	4.02e-87	0.576493	0.776	0.436	6.44e-83	Monocytes	Taldo1
Lamp21	1.42e-87	0.508861	0.56	0.237	2.27e-83	Monocytes	Lamp2
Emp31	1.12e-87	0.58243	0.844	0.49	1.8e-83	Monocytes	Emp3
F13a11	5.42e-88	0.557157	0.37	0.111	8.68e-84	Monocytes	F13a1
Ftl11	3.86e-89	0.318763	0.999	0.906	6.19e-85	Monocytes	Ftl1
Esd1	1.96e-89	0.597085	0.724	0.385	3.14e-85	Monocytes	Esd
Apobec11	1.47e-89	0.553076	0.39	0.126	2.36e-85	Monocytes	Apobec1
Cd681	4.22e-91	0.462506	0.747	0.333	6.76e-87	Monocytes	Cd68
Cd441	3.43e-92	0.548448	0.816	0.452	5.5e-88	Monocytes	Cd44
Nfe2l21	9.79e-93	0.589216	0.64	0.287	1.57e-88	Monocytes	Nfe2l2
Mefv	7.12e-93	0.42289	0.34	0.093	1.14e-88	Monocytes	Mefv
Oas1a1	1.09e-93	0.601074	0.459	0.165	1.74e-89	Monocytes	Oas1a
Ms4a6b1	1.82e-94	0.563031	0.631	0.274	2.91e-90	Monocytes	Ms4a6b
Lamp11	2.47e-95	0.554309	0.759	0.366	3.96e-91	Monocytes	Lamp1
Atox12	1.51e-95	0.519665	0.925	0.58	2.41e-91	Monocytes	Atox1
Ifi2051	1.49e-95	0.80967	0.381	0.119	2.39e-91	Monocytes	Ifi205
Nfam1	2.47e-96	0.507745	0.304	0.077	3.95e-92	Monocytes	Nfam1
Cxcl101	1.12e-96	1.31737	0.392	0.121	1.79e-92	Monocytes	Cxcl10
Egr1	5.36e-97	0.733163	0.589	0.244	8.58e-93	Monocytes	Egr1
Cyp4f18	1.86e-97	0.474324	0.429	0.134	2.97e-93	Monocytes	Cyp4f18
Sirpb1b	6.53e-99	0.417877	0.308	0.075	1.05e-94	Monocytes	Sirpb1b
Metrnl1	4.2e-99	0.582879	0.545	0.207	6.72e-95	Monocytes	Metrnl
Ptpn1	8.2e-100	0.720466	0.685	0.336	1.31e-95	Monocytes	Ptpn1
Tgm21	7.54e-100	0.698625	0.586	0.233	1.21e-95	Monocytes	Tgm2
Sirpb1a	6.67e-100	0.508381	0.304	0.074	1.07e-95	Monocytes	Sirpb1a
Ldlr	3.6e-100	0.577491	0.347	0.096	5.76e-96	Monocytes	Ldlr
Plin21	3.03e-100	0.54423	0.802	0.382	4.85e-96	Monocytes	Plin2
Tnfrsf1a	2.02e-100	0.614925	0.504	0.188	3.23e-96	Monocytes	Tnfrsf1a
Pirb1	1.21e-100	0.543114	0.493	0.177	1.93e-96	Monocytes	Pirb
Ccrl2	3.45e-101	0.446989	0.618	0.25	5.52e-97	Monocytes	Ccrl2
Aldh2	2.35e-101	0.572557	0.378	0.112	3.77e-97	Monocytes	Aldh2
Clec4a11	2.25e-101	0.573952	0.423	0.132	3.6e-97	Monocytes	Clec4a1
Thbs11	2.56e-103	0.60471	0.728	0.317	4.1e-99	Monocytes	Thbs1
Rnh11	1.68e-103	0.629534	0.758	0.378	2.69e-99	Monocytes	Rnh1
Vim1	1.56e-103	0.677045	0.927	0.642	2.5e-99	Monocytes	Vim
Ctsz2	6.46e-104	0.578176	0.881	0.466	1.03e-99	Monocytes	Ctsz
Lgals31	4.96e-104	0.384358	0.946	0.527	7.93e-100	Monocytes	Lgals3
Ccl91	3.06e-105	0.51132	0.586	0.212	4.9e-101	Monocytes	Ccl9
Tlr21	2.58e-105	0.586638	0.459	0.145	4.14e-101	Monocytes	Tlr2
Dusp1	5.77e-106	0.531256	0.918	0.562	9.24e-102	Monocytes	Dusp1
Arpc1b1	1.68e-106	0.578929	0.94	0.679	2.69e-102	Monocytes	Arpc1b
Csf2ra1	9.19e-107	0.594236	0.591	0.236	1.47e-102	Monocytes	Csf2ra
Tpd521	3.81e-107	0.574322	0.738	0.345	6.1e-103	Monocytes	Tpd52
Cd300a1	1.05e-107	0.659582	0.443	0.143	1.68e-103	Monocytes	Cd300a
Fcgr31	7.62e-108	0.526315	0.636	0.239	1.22e-103	Monocytes	Fcgr3
Zeb21	4e-108	0.561501	0.714	0.311	6.41e-104	Monocytes	Zeb2
BC028528	3.76e-108	0.55055	0.324	0.081	6.03e-104	Monocytes	BC028528
Ctsb1	1.82e-108	0.385749	0.948	0.541	2.91e-104	Monocytes	Ctsb
Smpdl3a	4.55e-109	0.724333	0.433	0.139	7.29e-105	Monocytes	Smpdl3a
Lrrc251	3.15e-110	0.587509	0.577	0.214	5.04e-106	Monocytes	Lrrc25
Cdkn1a1	1.99e-110	0.58302	0.858	0.458	3.19e-106	Monocytes	Cdkn1a
Ccl61	1.79e-110	0.285742	0.779	0.33	2.86e-106	Monocytes	Ccl6
Ifi211	2.82e-111	0.71588	0.372	0.104	4.52e-107	Monocytes	Ifi211
Sod21	1.51e-112	0.816375	0.638	0.284	2.42e-108	Monocytes	Sod2
Plod3	3.19e-113	0.561047	0.308	0.071	5.11e-109	Monocytes	Plod3
Zbp1	3.8e-114	0.737192	0.562	0.213	6.08e-110	Monocytes	Zbp1
Ninj11	2.35e-115	0.643929	0.749	0.331	3.77e-111	Monocytes	Ninj1
Fgr	8.23e-117	0.593423	0.407	0.114	1.32e-112	Monocytes	Fgr
Cd141	1.62e-117	0.547604	0.829	0.366	2.59e-113	Monocytes	Cd14
Rassf4	3.02e-119	0.729782	0.423	0.126	4.83e-115	Monocytes	Rassf4
Vcan	3.15e-120	0.644155	0.302	0.062	5.05e-116	Monocytes	Vcan
Ctsc1	5.45e-121	0.710527	0.735	0.327	8.73e-117	Monocytes	Ctsc
Cyba1	5.31e-122	0.550786	0.985	0.78	8.51e-118	Monocytes	Cyba
Mcemp1	1.58e-122	0.498062	0.426	0.114	2.53e-118	Monocytes	Mcemp1
Fos1	6.19e-123	0.886349	0.792	0.391	9.92e-119	Monocytes	Fos
Npc22	2.3e-127	0.681317	0.94	0.651	3.68e-123	Monocytes	Npc2
Mafb1	1.27e-127	0.629606	0.614	0.208	2.03e-123	Monocytes	Mafb
Atf31	6.74e-129	0.70327	0.766	0.319	1.08e-124	Monocytes	Atf3
Hck1	6.76e-129	0.714603	0.47	0.143	1.08e-124	Monocytes	Hck
Pla2g71	2.35e-130	0.707754	0.52	0.158	3.77e-126	Monocytes	Pla2g7
Ier31	4.51e-133	0.633319	0.829	0.381	7.23e-129	Monocytes	Ier3
Fcgr11	5.82e-135	0.751885	0.586	0.196	9.31e-131	Monocytes	Fcgr1
Spi12	1.1e-136	0.698216	0.783	0.339	1.76e-132	Monocytes	Spi1
Sat11	7.11e-137	0.90263	0.898	0.521	1.14e-132	Monocytes	Sat1
Samhd11	9.35e-138	0.849801	0.751	0.349	1.5e-133	Monocytes	Samhd1
Lyn1	8.07e-140	0.731969	0.729	0.302	1.29e-135	Monocytes	Lyn
Pld41	5.5e-140	0.684591	0.679	0.252	8.81e-136	Monocytes	Pld4
Wfdc17	1.71e-141	0.46065	0.835	0.363	2.74e-137	Monocytes	Wfdc17
Emilin21	8.45e-145	0.669197	0.668	0.236	1.35e-140	Monocytes	Emilin2
Mpeg11	1.13e-145	0.678762	0.714	0.264	1.81e-141	Monocytes	Mpeg1
Ifi27l2a1	1.87e-146	0.845474	0.962	0.673	3e-142	Monocytes	Ifi27l2a
Tnf1	8.33e-148	0.76109	0.692	0.252	1.33e-143	Monocytes	Tnf
Zfp36	1.52e-151	0.818217	0.931	0.539	2.43e-147	Monocytes	Zfp36
Slfn21	8.17e-156	0.765559	0.913	0.467	1.31e-151	Monocytes	Slfn2
Ncf21	7.59e-163	0.73353	0.659	0.222	1.22e-158	Monocytes	Ncf2
Napsa1	5.28e-164	0.830288	0.721	0.257	8.45e-160	Monocytes	Napsa
Ifitm21	1.29e-164	0.704401	0.964	0.467	2.06e-160	Monocytes	Ifitm2
Ifi2071	1.47e-165	0.787047	0.607	0.187	2.35e-161	Monocytes	Ifi207
Ifi2041	2.52e-166	0.831676	0.519	0.14	4.04e-162	Monocytes	Ifi204
Tgfbi1	2.31e-166	0.755002	0.791	0.29	3.69e-162	Monocytes	Tgfbi
Gsr	6.22e-167	0.733913	0.511	0.132	9.95e-163	Monocytes	Gsr
Ms4a6d1	1.31e-167	0.874963	0.61	0.189	2.1e-163	Monocytes	Ms4a6d
Tppp3	7.88e-168	0.736559	0.29	0.042	1.26e-163	Monocytes	Tppp3
Prdx51	1.25e-168	0.905273	0.925	0.548	2e-164	Monocytes	Prdx5
Psap1	1.09e-170	0.749442	0.98	0.603	1.74e-166	Monocytes	Psap
Cebpb1	5.52e-173	0.774988	0.925	0.443	8.84e-169	Monocytes	Cebpb
Alox5ap	1.3e-173	0.849109	0.903	0.423	2.08e-169	Monocytes	Alox5ap
Clec4e	5.31e-175	0.640849	0.816	0.283	8.51e-171	Monocytes	Clec4e
Clec4a31	1.01e-175	0.829552	0.501	0.123	1.62e-171	Monocytes	Clec4a3
Tyrobp	1.5e-176	0.688342	0.996	0.625	2.41e-172	Monocytes	Tyrobp
Gpx12	1.43e-178	0.883424	0.978	0.651	2.29e-174	Monocytes	Gpx1
Nupr11	2.51e-181	0.912249	0.549	0.144	4.02e-177	Monocytes	Nupr1
Ly6e	3.33e-183	0.775792	0.985	0.7	5.34e-179	Monocytes	Ly6e
Sirpb1c	8.5e-187	0.766017	0.425	0.084	1.36e-182	Monocytes	Sirpb1c
Irf71	3.56e-190	0.978597	0.735	0.266	5.7e-186	Monocytes	Irf7
C3	1.65e-197	0.778121	0.434	0.081	2.63e-193	Monocytes	C3
Msrb1	3.2e-203	0.773646	0.848	0.34	5.12e-199	Monocytes	Msrb1
Ly6c2	9.11e-204	1.44022	0.794	0.316	1.46e-199	Monocytes	Ly6c2
Fcer1g1	5.5e-205	0.851561	0.993	0.61	8.81e-201	Monocytes	Fcer1g
Gm211881	1.98e-215	0.852172	0.524	0.116	3.16e-211	Monocytes	Gm21188
F101	9.27e-219	0.879905	0.601	0.139	1.48e-214	Monocytes	F10
Ctss2	7.77e-221	0.906987	0.976	0.531	1.24e-216	Monocytes	Ctss
Klra2	2.5e-223	0.707363	0.411	0.064	4.01e-219	Monocytes	Klra2
Gm9733	5.52e-227	0.852184	0.389	0.057	8.84e-223	Monocytes	Gm9733
Csf1r1	2.51e-233	0.960109	0.646	0.165	4.02e-229	Monocytes	Csf1r
Gda1	2.22e-242	1.11824	0.735	0.215	3.56e-238	Monocytes	Gda
Ms4a4c2	3.07e-249	1.12235	0.753	0.224	4.92e-245	Monocytes	Ms4a4c
Lst11	1.24e-252	1.00451	0.815	0.245	1.99e-248	Monocytes	Lst1
Gngt21	7.76e-268	1.47839	0.742	0.223	1.24e-263	Monocytes	Gngt2
Ms4a4a1	1e-269	1.12267	0.657	0.152	1.6e-265	Monocytes	Ms4a4a
Mgst1	1.62e-271	0.861237	0.386	0.045	2.6e-267	Monocytes	Mgst1
Gm361611	2.97e-272	0.997781	0.597	0.126	4.76e-268	Monocytes	Gm36161
Ly6i	9.57e-290	1.23796	0.439	0.058	1.53e-285	Monocytes	Ly6i
Chil3	1.48e-302	1.55753	0.466	0.063	2.38e-298	Monocytes	Chil3
Lyz21	0	1.93261	0.964	0.346	0	Monocytes	Lyz2
Plac8	0	1.55729	0.96	0.445	0	Monocytes	Plac8
Ifitm32	0	1.33012	0.993	0.492	0	Monocytes	Ifitm3
Ms4a6c1	0	1.29831	0.896	0.269	0	Monocytes	Ms4a6c
Hp	0	1.29415	0.61	0.091	0	Monocytes	Hp
Cybb1	0	1.27972	0.835	0.251	0	Monocytes	Cybb
Ifitm61	0	1.26053	0.639	0.117	0	Monocytes	Ifitm6
Mkrn1	2.19e-06	0.284198	0.383	0.317	0.0350563	Macrophages	Mkrn1
mt-Co1	9.96e-08	0.258287	0.985	0.939	0.00159502	Macrophages	mt-Co1
Slc38a1	1.89e-15	0.253493	0.338	0.255	3.02e-11	Macrophages	Slc38a1
Malat1	1.94e-16	0.457972	0.968	0.988	3.1e-12	Macrophages	Malat1
mt-Co2	5.72e-18	0.297416	0.95	0.894	9.17e-14	Macrophages	mt-Co2
Itm2b	1.53e-26	0.313024	0.785	0.732	2.45e-22	Macrophages	Itm2b
Gm42418	1.03e-27	0.407756	1	1	1.66e-23	Macrophages	Gm42418
Rnf213	5.75e-28	0.256895	0.332	0.22	9.2e-24	Macrophages	Rnf213
Nfkbie	2.06e-28	0.291204	0.283	0.183	3.31e-24	Macrophages	Nfkbie
Kdm6b	4.99e-30	0.261694	0.468	0.33	7.98e-26	Macrophages	Kdm6b
Txnrd1	7.41e-31	0.256602	0.277	0.17	1.19e-26	Macrophages	Txnrd1
Uqcc2	9.55e-32	0.251613	0.347	0.23	1.53e-27	Macrophages	Uqcc2
Sqstm1	3.09e-33	0.265321	0.67	0.537	4.95e-29	Macrophages	Sqstm1
Hdlbp	2.12e-34	0.253745	0.332	0.211	3.4e-30	Macrophages	Hdlbp
Spag9	1.24e-35	0.303765	0.403	0.27	1.99e-31	Macrophages	Spag9
Prdx2	2.2e-37	0.521655	0.489	0.348	3.53e-33	Macrophages	Prdx2
Gm26917	1.23e-37	0.567211	0.548	0.401	1.97e-33	Macrophages	Gm26917
Rpn1	4.63e-38	0.251114	0.275	0.159	7.42e-34	Macrophages	Rpn1
AY036118	3.41e-38	0.428486	0.581	0.428	5.46e-34	Macrophages	AY036118
Lars2	1.15e-38	0.484526	0.941	0.864	1.85e-34	Macrophages	Lars2
Uqcrq	3.29e-39	0.260164	0.68	0.526	5.28e-35	Macrophages	Uqcrq
Gpr137b	1.15e-39	0.294986	0.277	0.16	1.84e-35	Macrophages	Gpr137b
Nckap1l	1.47e-41	0.256781	0.265	0.148	2.36e-37	Macrophages	Nckap1l
Nars	1.02e-41	0.257372	0.313	0.186	1.64e-37	Macrophages	Nars
Metap2	4.02e-42	0.253178	0.384	0.239	6.43e-38	Macrophages	Metap2
Chka	2.92e-43	0.404884	0.293	0.167	4.68e-39	Macrophages	Chka
Sec61g	2.54e-43	0.267708	0.724	0.553	4.07e-39	Macrophages	Sec61g
Capns1	1.84e-43	0.2531	0.456	0.3	2.95e-39	Macrophages	Capns1
Uqcr11	1.48e-43	0.271535	0.496	0.338	2.37e-39	Macrophages	Uqcr11
Rilpl2	3.62e-44	0.272805	0.443	0.29	5.8e-40	Macrophages	Rilpl2
Higd1a	1.3e-45	0.338392	0.545	0.39	2.08e-41	Macrophages	Higd1a
Ap2s1	6.99e-46	0.275545	0.466	0.311	1.12e-41	Macrophages	Ap2s1
Arhgdia	5.02e-46	0.257138	0.665	0.483	8.04e-42	Macrophages	Arhgdia
Mrpl52	2.78e-46	0.282849	0.679	0.507	4.46e-42	Macrophages	Mrpl52
Ppp2ca	1.88e-46	0.296738	0.43	0.275	3.01e-42	Macrophages	Ppp2ca
Prkcd	1.31e-46	0.287283	0.37	0.221	2.1e-42	Macrophages	Prkcd
Esd	6.83e-47	0.315768	0.524	0.367	1.09e-42	Macrophages	Esd
Oas1a	1.05e-47	0.27895	0.281	0.152	1.68e-43	Macrophages	Oas1a
Slc25a39	3.07e-48	0.51404	0.255	0.135	4.91e-44	Macrophages	Slc25a39
Lgals3bp	1.16e-49	0.32246	0.321	0.184	1.86e-45	Macrophages	Lgals3bp
Dynll1	1.07e-49	0.281544	0.683	0.523	1.72e-45	Macrophages	Dynll1
Arl4c	5.66e-50	0.300856	0.349	0.199	9.06e-46	Macrophages	Arl4c
Cd83	3.93e-50	0.316899	0.367	0.216	6.29e-46	Macrophages	Cd83
Tuba1b	2.39e-52	0.284705	0.339	0.19	3.82e-48	Macrophages	Tuba1b
Manf	2.42e-53	0.32321	0.491	0.325	3.88e-49	Macrophages	Manf
Ist1	2.28e-53	0.343462	0.368	0.215	3.64e-49	Macrophages	Ist1
Lamtor4	1.94e-53	0.261006	0.421	0.252	3.11e-49	Macrophages	Lamtor4
Pycard	2.19e-54	0.336318	0.444	0.281	3.51e-50	Macrophages	Pycard
Ywhag	4.56e-55	0.291873	0.358	0.202	7.31e-51	Macrophages	Ywhag
Arpc1b	1.79e-55	0.279349	0.792	0.664	2.87e-51	Macrophages	Arpc1b
Cd86	1.27e-55	0.311189	0.304	0.161	2.03e-51	Macrophages	Cd86
Ly86	3.24e-56	0.337303	0.349	0.199	5.19e-52	Macrophages	Ly86
Gpi1	8.45e-57	0.447588	0.609	0.453	1.35e-52	Macrophages	Gpi1
Pgd	6.51e-57	0.253808	0.254	0.122	1.04e-52	Macrophages	Pgd
Chmp2a	3.42e-57	0.282964	0.569	0.376	5.47e-53	Macrophages	Chmp2a
Snx3	1.06e-57	0.273896	0.587	0.404	1.69e-53	Macrophages	Snx3
Got1	9.62e-58	0.259214	0.447	0.265	1.54e-53	Macrophages	Got1
Dot1l	4.74e-58	0.306517	0.261	0.126	7.59e-54	Macrophages	Dot1l
Neat1	3.71e-58	0.544424	0.423	0.253	5.94e-54	Macrophages	Neat1
Ndufc1	1.51e-58	0.337294	0.412	0.248	2.41e-54	Macrophages	Ndufc1
Mxi1	9.86e-59	0.297326	0.301	0.154	1.58e-54	Macrophages	Mxi1
Rgs1	6.18e-59	0.515585	0.617	0.457	9.89e-55	Macrophages	Rgs1
Vapa	6.06e-59	0.285451	0.47	0.292	9.7e-55	Macrophages	Vapa
Cux1	5.94e-59	0.268542	0.284	0.14	9.52e-55	Macrophages	Cux1
Nrros	3.17e-59	0.321944	0.32	0.171	5.07e-55	Macrophages	Nrros
Mbnl2	2.23e-59	0.292785	0.308	0.158	3.57e-55	Macrophages	Mbnl2
Hmga1	1.71e-59	0.281676	0.263	0.128	2.74e-55	Macrophages	Hmga1
Trappc2l	8.77e-62	0.278088	0.339	0.183	1.4e-57	Macrophages	Trappc2l
Itgb2	6.56e-62	0.324798	0.509	0.321	1.05e-57	Macrophages	Itgb2
Ehd4	5.74e-62	0.324015	0.276	0.135	9.18e-58	Macrophages	Ehd4
Cnih4	8.88e-63	0.25924	0.386	0.217	1.42e-58	Macrophages	Cnih4
Clic4	6.43e-63	0.27356	0.429	0.243	1.03e-58	Macrophages	Clic4
Sem1	3.23e-63	0.276831	0.829	0.71	5.18e-59	Macrophages	Sem1
Lpin2	2.57e-63	0.292709	0.257	0.117	4.11e-59	Macrophages	Lpin2
Csf2rb	1.62e-63	0.358523	0.467	0.274	2.6e-59	Macrophages	Csf2rb
Psmd8	1.91e-65	0.358526	0.542	0.358	3.06e-61	Macrophages	Psmd8
Bax	5.58e-66	0.302093	0.558	0.359	8.93e-62	Macrophages	Bax
Map7d1	1.1e-66	0.316039	0.254	0.113	1.76e-62	Macrophages	Map7d1
Chd9	9.05e-67	0.262623	0.259	0.116	1.45e-62	Macrophages	Chd9
Mapk6	5.81e-67	0.305137	0.287	0.134	9.3e-63	Macrophages	Mapk6
Jarid2	1.68e-67	0.448903	0.339	0.179	2.69e-63	Macrophages	Jarid2
Socs3	1.16e-67	0.299459	0.416	0.226	1.86e-63	Macrophages	Socs3
Vdac1	1.04e-67	0.372588	0.351	0.189	1.67e-63	Macrophages	Vdac1
Stap1	1.16e-68	0.353187	0.275	0.128	1.86e-64	Macrophages	Stap1
Piezo1	1.06e-68	0.461543	0.263	0.121	1.69e-64	Macrophages	Piezo1
Furin	3.52e-69	0.304406	0.318	0.154	5.64e-65	Macrophages	Furin
Ptpre	3.7e-70	0.348489	0.301	0.142	5.92e-66	Macrophages	Ptpre
Sdf2l1	3.02e-70	0.356611	0.315	0.158	4.84e-66	Macrophages	Sdf2l1
Snx18	6.2e-72	0.280141	0.38	0.193	9.93e-68	Macrophages	Snx18
Ifrd1	4.82e-72	0.355585	0.679	0.492	7.71e-68	Macrophages	Ifrd1
Slc6a6	2.01e-72	0.324052	0.371	0.194	3.21e-68	Macrophages	Slc6a6
Dok2	1.61e-72	0.295452	0.253	0.106	2.58e-68	Macrophages	Dok2
Cmpk1	6.92e-74	0.317261	0.385	0.206	1.11e-69	Macrophages	Cmpk1
Rbpj	1.07e-74	0.327147	0.349	0.175	1.71e-70	Macrophages	Rbpj
Atp6ap1	3.87e-75	0.324361	0.384	0.203	6.19e-71	Macrophages	Atp6ap1
Psmb6	1.28e-75	0.415836	0.569	0.375	2.04e-71	Macrophages	Psmb6
Irf7	8.33e-76	0.506851	0.436	0.25	1.33e-71	Macrophages	Irf7
Lilrb4a	5.25e-76	0.265601	0.287	0.124	8.41e-72	Macrophages	Lilrb4a
Pfkl	4.8e-76	0.29458	0.264	0.112	7.68e-72	Macrophages	Pfkl
Pitpna	7.27e-77	0.384714	0.475	0.275	1.16e-72	Macrophages	Pitpna
Ssfa2	2.42e-77	0.437764	0.284	0.129	3.88e-73	Macrophages	Ssfa2
Gns	9.4e-80	0.347728	0.289	0.127	1.51e-75	Macrophages	Gns
Plbd1	6.42e-80	0.254606	0.452	0.228	1.03e-75	Macrophages	Plbd1
Bach1	4.44e-80	0.404116	0.269	0.114	7.1e-76	Macrophages	Bach1
Trim25	3.01e-80	0.435381	0.443	0.249	4.82e-76	Macrophages	Trim25
Rtn4	9.39e-81	0.401619	0.445	0.247	1.5e-76	Macrophages	Rtn4
Sh3bgrl	4.51e-81	0.395356	0.379	0.195	7.22e-77	Macrophages	Sh3bgrl
Hsd17b12	2.75e-81	0.31494	0.261	0.107	4.4e-77	Macrophages	Hsd17b12
Pirb	1.22e-81	0.356673	0.328	0.153	1.95e-77	Macrophages	Pirb
Sgpl1	1.57e-83	0.304629	0.284	0.119	2.52e-79	Macrophages	Sgpl1
Dgkz	5.72e-84	0.317183	0.265	0.104	9.17e-80	Macrophages	Dgkz
Ptafr	1.49e-84	0.276988	0.292	0.121	2.39e-80	Macrophages	Ptafr
Prdx5	2.44e-85	0.315706	0.716	0.524	3.9e-81	Macrophages	Prdx5
Gusb	9.76e-86	0.378603	0.288	0.125	1.56e-81	Macrophages	Gusb
Hsp90b1	1.12e-86	0.444343	0.726	0.545	1.79e-82	Macrophages	Hsp90b1
Maf	9.74e-87	0.308525	0.292	0.117	1.56e-82	Macrophages	Maf
Nfe2l2	1.75e-87	0.296463	0.478	0.252	2.8e-83	Macrophages	Nfe2l2
Ucp2	1.27e-87	0.417553	0.794	0.609	2.03e-83	Macrophages	Ucp2
Sod2	1.24e-87	0.326286	0.465	0.253	1.99e-83	Macrophages	Sod2
Dbi	2.35e-88	0.479866	0.571	0.352	3.76e-84	Macrophages	Dbi
Unc93b1	1.45e-89	0.363121	0.461	0.245	2.32e-85	Macrophages	Unc93b1
Gpr35	4.3e-90	0.285002	0.26	0.099	6.89e-86	Macrophages	Gpr35
Ifnar2	3.12e-90	0.352382	0.49	0.268	4.99e-86	Macrophages	Ifnar2
Gabarap	1.86e-90	0.297108	0.815	0.687	2.99e-86	Macrophages	Gabarap
Gsn	1.22e-90	0.320815	0.384	0.185	1.95e-86	Macrophages	Gsn
Pxn	1.07e-90	0.337679	0.283	0.113	1.71e-86	Macrophages	Pxn
Snx6	7.05e-91	0.356497	0.315	0.137	1.13e-86	Macrophages	Snx6
Tuba1c	1.18e-91	0.387504	0.333	0.149	1.88e-87	Macrophages	Tuba1c
Slc16a3	5.46e-92	0.267756	0.445	0.225	8.74e-88	Macrophages	Slc16a3
Gngt2	4.96e-92	0.299375	0.414	0.204	7.94e-88	Macrophages	Gngt2
Anxa2	5.7e-93	0.434011	0.737	0.538	9.13e-89	Macrophages	Anxa2
Gm21188	4.21e-93	0.347162	0.267	0.102	6.73e-89	Macrophages	Gm21188
Znhit1	3.58e-93	0.359865	0.383	0.186	5.73e-89	Macrophages	Znhit1
Iqgap1	2.84e-96	0.450461	0.762	0.562	4.55e-92	Macrophages	Iqgap1
Cltc	2.13e-96	0.398335	0.434	0.223	3.41e-92	Macrophages	Cltc
Lyn	1.38e-96	0.401834	0.503	0.27	2.21e-92	Macrophages	Lyn
Lasp1	5.21e-97	0.354678	0.383	0.178	8.33e-93	Macrophages	Lasp1
Vsir	2.37e-97	0.347515	0.336	0.142	3.79e-93	Macrophages	Vsir
Sap30	1.05e-97	0.45797	0.275	0.106	1.69e-93	Macrophages	Sap30
Fam162a	7.04e-98	0.378995	0.414	0.204	1.13e-93	Macrophages	Fam162a
Cxcl10	6.07e-98	0.312954	0.263	0.096	9.72e-94	Macrophages	Cxcl10
Lamp2	1.91e-98	0.337346	0.418	0.202	3.05e-94	Macrophages	Lamp2
Tmem256	2.71e-99	0.443403	0.484	0.264	4.34e-95	Macrophages	Tmem256
Ahnak	6.09e-101	0.614142	0.669	0.446	9.75e-97	Macrophages	Ahnak
Rab5c	4.49e-101	0.417794	0.423	0.212	7.2e-97	Macrophages	Rab5c
Capza2	4.25e-101	0.40619	0.548	0.316	6.81e-97	Macrophages	Capza2
Atox1	2.71e-101	0.31748	0.798	0.534	4.33e-97	Macrophages	Atox1
Rab1a	2.51e-101	0.382115	0.397	0.188	4.02e-97	Macrophages	Rab1a
Klf4	1.47e-101	0.541274	0.305	0.124	2.35e-97	Macrophages	Klf4
Scpep1	8e-102	0.398014	0.36	0.161	1.28e-97	Macrophages	Scpep1
Marcks	3.72e-102	0.32514	0.483	0.241	5.95e-98	Macrophages	Marcks
Snx5	3.56e-102	0.362936	0.495	0.262	5.7e-98	Macrophages	Snx5
Ndrg1	2.58e-102	0.619693	0.354	0.16	4.13e-98	Macrophages	Ndrg1
Hspa5	1.9e-102	0.614794	0.786	0.633	3.04e-98	Macrophages	Hspa5
Snx2	4.87e-103	0.370511	0.334	0.142	7.8e-99	Macrophages	Snx2
Cd84	2.27e-103	0.275029	0.284	0.101	3.64e-99	Macrophages	Cd84
Pld4	2.63e-104	0.353012	0.453	0.221	4.2e-100	Macrophages	Pld4
Hck	2.71e-105	0.391098	0.301	0.117	4.35e-101	Macrophages	Hck
Sgk1	2.67e-105	0.511812	0.326	0.135	4.27e-101	Macrophages	Sgk1
Il1b	8.43e-106	0.272301	0.658	0.383	1.35e-101	Macrophages	Il1b
Syk	5.04e-106	0.442309	0.478	0.242	8.07e-102	Macrophages	Syk
Calr	1.71e-106	0.486362	0.626	0.396	2.74e-102	Macrophages	Calr
Fkbp2	1.29e-107	0.429815	0.389	0.181	2.06e-103	Macrophages	Fkbp2
Atp6v1b2	3.61e-108	0.457765	0.403	0.188	5.78e-104	Macrophages	Atp6v1b2
Lrpap1	2.58e-108	0.391946	0.32	0.129	4.13e-104	Macrophages	Lrpap1
Slc2a1	7.91e-110	0.500659	0.311	0.122	1.27e-105	Macrophages	Slc2a1
Clec12a	3.96e-110	0.428556	0.252	0.085	6.34e-106	Macrophages	Clec12a
Anxa1	6.47e-111	0.385017	0.357	0.149	1.04e-106	Macrophages	Anxa1
Eif4a1	8.13e-112	0.464933	0.694	0.476	1.3e-107	Macrophages	Eif4a1
Ifi27l2a	1.44e-112	0.505775	0.828	0.644	2.31e-108	Macrophages	Ifi27l2a
Aldoa	1.25e-112	0.565802	0.76	0.583	2.01e-108	Macrophages	Aldoa
P4hb	7.46e-113	0.458894	0.585	0.348	1.19e-108	Macrophages	P4hb
Picalm	7.5e-115	0.467945	0.541	0.297	1.2e-110	Macrophages	Picalm
Azin1	3.32e-115	0.470651	0.329	0.131	5.32e-111	Macrophages	Azin1
Creg1	8.78e-116	0.480554	0.431	0.207	1.41e-111	Macrophages	Creg1
Pdia6	3.91e-116	0.495349	0.484	0.254	6.26e-112	Macrophages	Pdia6
Soat1	6.22e-117	0.390267	0.284	0.099	9.96e-113	Macrophages	Soat1
Adssl1	1.07e-117	0.395762	0.273	0.092	1.71e-113	Macrophages	Adssl1
Klf6	3.41e-118	0.475089	0.762	0.536	5.46e-114	Macrophages	Klf6
Zmiz1	1.03e-118	0.48867	0.382	0.166	1.65e-114	Macrophages	Zmiz1
Osm	3.12e-119	0.280229	0.365	0.142	5e-115	Macrophages	Osm
Bri3	1.01e-119	0.450617	0.594	0.34	1.61e-115	Macrophages	Bri3
Ero1l	6.17e-120	0.562859	0.335	0.132	9.87e-116	Macrophages	Ero1l
Ms4a4c	3.01e-120	0.540784	0.433	0.201	4.81e-116	Macrophages	Ms4a4c
Gde1	5.54e-121	0.417979	0.276	0.092	8.88e-117	Macrophages	Gde1
Sat1	4.51e-121	0.637599	0.714	0.488	7.22e-117	Macrophages	Sat1
Mcub	1.03e-121	0.390243	0.269	0.088	1.64e-117	Macrophages	Mcub
Ehd1	1.69e-122	0.477056	0.599	0.343	2.71e-118	Macrophages	Ehd1
Tlr2	3.88e-124	0.388412	0.319	0.112	6.21e-120	Macrophages	Tlr2
Osbpl8	3.42e-125	0.46684	0.328	0.122	5.47e-121	Macrophages	Osbpl8
Gm36161	2.82e-125	0.43063	0.307	0.107	4.52e-121	Macrophages	Gm36161
Rsad2	3.6e-126	0.512386	0.298	0.102	5.76e-122	Macrophages	Rsad2
Mif	8.21e-127	0.575432	0.769	0.591	1.31e-122	Macrophages	Mif
Mcl1	7.28e-127	0.442293	0.763	0.524	1.17e-122	Macrophages	Mcl1
Cyfip1	4.17e-128	0.494692	0.368	0.152	6.68e-124	Macrophages	Cyfip1
Lgals1	7.81e-129	0.515499	0.746	0.505	1.25e-124	Macrophages	Lgals1
Bsg	5.12e-129	0.566058	0.625	0.389	8.2e-125	Macrophages	Bsg
Emp3	3.46e-130	0.470987	0.701	0.446	5.53e-126	Macrophages	Emp3
Rbms1	1.74e-131	0.498111	0.588	0.319	2.79e-127	Macrophages	Rbms1
Phlda1	1.51e-131	0.529869	0.505	0.248	2.42e-127	Macrophages	Phlda1
Plekho1	7.83e-133	0.504878	0.36	0.141	1.25e-128	Macrophages	Plekho1
Zfand5	2.22e-133	0.5348	0.511	0.257	3.56e-129	Macrophages	Zfand5
Anxa4	9.33e-134	0.455794	0.3	0.101	1.49e-129	Macrophages	Anxa4
Rap2b	8.23e-134	0.46864	0.31	0.104	1.32e-129	Macrophages	Rap2b
Cxcl16	2.72e-136	0.494211	0.403	0.163	4.36e-132	Macrophages	Cxcl16
Slamf7	1.75e-136	0.616175	0.35	0.135	2.8e-132	Macrophages	Slamf7
Ldha	6.15e-137	0.551911	0.785	0.597	9.85e-133	Macrophages	Ldha
Cd63	5.3e-137	0.538302	0.384	0.145	8.48e-133	Macrophages	Cd63
Cd44	3.66e-137	0.43512	0.688	0.4	5.85e-133	Macrophages	Cd44
Atp6v0b	7.6e-138	0.470614	0.687	0.424	1.22e-133	Macrophages	Atp6v0b
Rnf149	7.45e-138	0.42546	0.528	0.251	1.19e-133	Macrophages	Rnf149
Tmem189	4.84e-138	0.38941	0.413	0.165	7.74e-134	Macrophages	Tmem189
Spi1	1.73e-139	0.460045	0.586	0.292	2.77e-135	Macrophages	Spi1
Epb41l2	6.86e-140	0.566487	0.329	0.116	1.1e-135	Macrophages	Epb41l2
Plec	4.82e-141	0.695317	0.427	0.184	7.72e-137	Macrophages	Plec
Mdfic	2.28e-141	0.459801	0.256	0.071	3.65e-137	Macrophages	Mdfic
Selenop	3.18e-142	0.680948	0.274	0.081	5.08e-138	Macrophages	Selenop
Cyba	2.4e-142	0.442364	0.86	0.771	3.85e-138	Macrophages	Cyba
Lat2	1.45e-143	0.473043	0.301	0.097	2.33e-139	Macrophages	Lat2
Nlrp3	3.19e-144	0.356309	0.437	0.176	5.11e-140	Macrophages	Nlrp3
Eif4e	2.12e-144	0.550212	0.418	0.177	3.39e-140	Macrophages	Eif4e
Oasl1	4.45e-145	0.646184	0.299	0.093	7.13e-141	Macrophages	Oasl1
Prdx1	4.18e-146	0.765888	0.69	0.476	6.69e-142	Macrophages	Prdx1
Plekho2	2.04e-146	0.555324	0.377	0.144	3.26e-142	Macrophages	Plekho2
Ccr5	1.45e-147	0.56229	0.391	0.153	2.33e-143	Macrophages	Ccr5
Mfsd1	1.03e-147	0.444191	0.381	0.143	1.66e-143	Macrophages	Mfsd1
Rnh1	7.56e-149	0.540338	0.603	0.332	1.21e-144	Macrophages	Rnh1
Cflar	6.04e-149	0.564552	0.497	0.226	9.67e-145	Macrophages	Cflar
Cebpb	4.86e-149	0.253484	0.726	0.386	7.78e-145	Macrophages	Cebpb
Rab20	1.63e-150	0.326315	0.394	0.137	2.6e-146	Macrophages	Rab20
Rhob	3.1e-152	0.608472	0.379	0.137	4.97e-148	Macrophages	Rhob
Gda	6.5e-156	0.493425	0.456	0.178	1.04e-151	Macrophages	Gda
Ncf2	2.34e-156	0.452382	0.453	0.18	3.74e-152	Macrophages	Ncf2
Csf2ra	4.68e-157	0.525167	0.455	0.19	7.49e-153	Macrophages	Csf2ra
Zfp703	3.35e-157	0.50759	0.266	0.069	5.37e-153	Macrophages	Zfp703
Atp6v1a	4.88e-158	0.426333	0.406	0.153	7.81e-154	Macrophages	Atp6v1a
Pgk1	9.53e-160	0.758555	0.654	0.406	1.53e-155	Macrophages	Pgk1
Cybb	1.04e-160	0.528649	0.509	0.214	1.66e-156	Macrophages	Cybb
Akr1a1	9.57e-161	0.639171	0.688	0.443	1.53e-156	Macrophages	Akr1a1
Il1rn	1.68e-161	0.297356	0.479	0.19	2.69e-157	Macrophages	Il1rn
Errfi1	1.89e-162	0.659853	0.268	0.069	3.03e-158	Macrophages	Errfi1
Atp6v0c	7.58e-165	0.517602	0.725	0.494	1.21e-160	Macrophages	Atp6v0c
Fos	1.19e-166	0.740447	0.638	0.34	1.9e-162	Macrophages	Fos
Atp2b1	6.04e-168	0.593044	0.645	0.34	9.67e-164	Macrophages	Atp2b1
Rbm47	5.19e-168	0.579465	0.303	0.086	8.31e-164	Macrophages	Rbm47
Ptgs2	8.42e-169	0.806708	0.393	0.139	1.35e-164	Macrophages	Ptgs2
Atp6v1c1	1.64e-170	0.468969	0.352	0.111	2.62e-166	Macrophages	Atp6v1c1
Bnip3	1.54e-171	0.468707	0.324	0.092	2.47e-167	Macrophages	Bnip3
Por	2.08e-174	0.549091	0.397	0.134	3.33e-170	Macrophages	Por
Mdm2	1.56e-175	0.682102	0.427	0.16	2.5e-171	Macrophages	Mdm2
Eno1	3.64e-177	0.677309	0.711	0.456	5.82e-173	Macrophages	Eno1
Tnf	1.04e-178	0.553824	0.502	0.203	1.66e-174	Macrophages	Tnf
Mpeg1	5.9e-179	0.554093	0.519	0.214	9.45e-175	Macrophages	Mpeg1
Ifi204	2.73e-181	0.559321	0.346	0.101	4.38e-177	Macrophages	Ifi204
Tubb6	9.78e-185	0.590147	0.378	0.126	1.57e-180	Macrophages	Tubb6
Cfp	3.96e-186	0.557297	0.466	0.172	6.34e-182	Macrophages	Cfp
Itga5	1.68e-187	0.610612	0.274	0.062	2.69e-183	Macrophages	Itga5
Ctsh	3.62e-188	0.576117	0.629	0.3	5.8e-184	Macrophages	Ctsh
Clec4d	7e-189	0.258726	0.518	0.184	1.12e-184	Macrophages	Clec4d
Hexa	3.68e-193	0.657551	0.44	0.166	5.89e-189	Macrophages	Hexa
Pla2g7	3.2e-193	0.484566	0.384	0.11	5.12e-189	Macrophages	Pla2g7
Eps8	2.85e-193	0.681211	0.328	0.091	4.57e-189	Macrophages	Eps8
Efhd2	9.27e-194	0.618093	0.693	0.381	1.48e-189	Macrophages	Efhd2
Tcirg1	1.35e-194	0.631379	0.408	0.136	2.17e-190	Macrophages	Tcirg1
Tpd52	3.73e-195	0.442349	0.627	0.28	5.98e-191	Macrophages	Tpd52
Card19	5.37e-197	0.410566	0.633	0.301	8.6e-193	Macrophages	Card19
Pgam1	1.45e-199	0.691151	0.647	0.356	2.32e-195	Macrophages	Pgam1
Fcgr4	5e-205	0.56345	0.302	0.067	8e-201	Macrophages	Fcgr4
Ftl1-ps1	2.41e-210	0.585519	0.483	0.18	3.85e-206	Macrophages	Ftl1-ps1
Aprt	3.21e-211	0.717448	0.633	0.332	5.14e-207	Macrophages	Aprt
Slfn2	4.22e-213	0.689028	0.73	0.413	6.75e-209	Macrophages	Slfn2
Npc2	4.1e-213	0.595979	0.84	0.61	6.57e-209	Macrophages	Npc2
Fabp5	3.18e-214	1.01223	0.535	0.226	5.09e-210	Macrophages	Fabp5
Ninj1	8.07e-217	0.597601	0.61	0.269	1.29e-212	Macrophages	Ninj1
Gapdh	6.16e-217	0.724729	0.862	0.729	9.86e-213	Macrophages	Gapdh
Clec4a3	8.14e-218	0.645939	0.336	0.082	1.3e-213	Macrophages	Clec4a3
Emilin2	9.17e-219	0.698071	0.503	0.18	1.47e-214	Macrophages	Emilin2
Nceh1	1.58e-220	0.582771	0.323	0.073	2.53e-216	Macrophages	Nceh1
Cdkn1a	1.07e-220	0.576282	0.737	0.394	1.72e-216	Macrophages	Cdkn1a
Ifitm3	7.47e-222	0.540402	0.823	0.418	1.2e-217	Macrophages	Ifitm3
Adam8	8.09e-226	0.706231	0.505	0.189	1.3e-221	Macrophages	Adam8
Apobec1	4.23e-231	0.58189	0.335	0.074	6.77e-227	Macrophages	Apobec1
Ctsa	1.17e-233	0.754427	0.603	0.276	1.87e-229	Macrophages	Ctsa
Eif4ebp1	1e-234	0.695524	0.457	0.15	1.61e-230	Macrophages	Eif4ebp1
Plk2	9.52e-235	0.848287	0.338	0.078	1.52e-230	Macrophages	Plk2
Nupr1	7.67e-235	0.757778	0.377	0.099	1.23e-230	Macrophages	Nupr1
Pkm	9.42e-236	0.722449	0.809	0.557	1.51e-231	Macrophages	Pkm
Itgam	3.01e-236	0.690622	0.379	0.099	4.81e-232	Macrophages	Itgam
Atf3	2.31e-236	0.936306	0.606	0.257	3.7e-232	Macrophages	Atf3
Spp1	1.45e-236	1.24985	0.369	0.094	2.32e-232	Macrophages	Spp1
Sdcbp	3.16e-240	0.63766	0.702	0.368	5.07e-236	Macrophages	Sdcbp
Clec4n	1.35e-242	0.732687	0.437	0.129	2.15e-238	Macrophages	Clec4n
Vat1	3.08e-243	0.600022	0.255	0.036	4.94e-239	Macrophages	Vat1
Lmna	1.89e-244	0.765907	0.372	0.092	3.02e-240	Macrophages	Lmna
Vegfa	2.68e-245	0.908726	0.382	0.1	4.29e-241	Macrophages	Vegfa
Sirpa	3.05e-252	0.713451	0.431	0.125	4.89e-248	Macrophages	Sirpa
Ifi207	1.27e-252	0.72559	0.446	0.133	2.03e-248	Macrophages	Ifi207
F10	7.67e-257	0.911342	0.388	0.094	1.23e-252	Macrophages	F10
Basp1	4.15e-257	0.709586	0.677	0.294	6.65e-253	Macrophages	Basp1
Tpi1	1.36e-257	0.90479	0.651	0.316	2.18e-253	Macrophages	Tpi1
C5ar1	2.48e-259	0.460739	0.475	0.128	3.97e-255	Macrophages	C5ar1
Mt1	3.98e-260	1.0002	0.657	0.296	6.37e-256	Macrophages	Mt1
Blvrb	3.07e-264	0.840865	0.365	0.083	4.91e-260	Macrophages	Blvrb
Tgm2	1.17e-265	0.7442	0.513	0.164	1.88e-261	Macrophages	Tgm2
Rrbp1	1.03e-266	0.82879	0.733	0.377	1.64e-262	Macrophages	Rrbp1
Lilr4b	8.68e-267	0.597513	0.699	0.299	1.39e-262	Macrophages	Lilr4b
Fn1	4.67e-267	1.12974	0.261	0.032	7.49e-263	Macrophages	Fn1
Tmem106a	6.66e-268	0.714899	0.386	0.095	1.07e-263	Macrophages	Tmem106a
Cd300c2	2.64e-268	0.687365	0.503	0.161	4.23e-264	Macrophages	Cd300c2
Ier3	7.49e-269	0.46759	0.707	0.305	1.2e-264	Macrophages	Ier3
Gpx1	9.71e-270	0.82962	0.888	0.595	1.55e-265	Macrophages	Gpx1
Clec4a1	2.33e-275	0.737746	0.361	0.076	3.74e-271	Macrophages	Clec4a1
Ccl4	3.37e-281	0.408654	0.7	0.309	5.4e-277	Macrophages	Ccl4
Lamp1	1.02e-282	0.793841	0.66	0.296	1.63e-278	Macrophages	Lamp1
Abca1	1.4e-285	0.730252	0.253	0.024	2.24e-281	Macrophages	Abca1
Ms4a6c	1.96e-291	0.836577	0.591	0.213	3.14e-287	Macrophages	Ms4a6c
Fam129b	1.79e-292	0.755571	0.363	0.072	2.87e-288	Macrophages	Fam129b
Sdc3	2.7e-295	0.831725	0.434	0.114	4.33e-291	Macrophages	Sdc3
Slc15a3	3.21e-298	0.846345	0.584	0.203	5.14e-294	Macrophages	Slc15a3
Lrrc25	4.97e-299	0.735599	0.499	0.144	7.96e-295	Macrophages	Lrrc25
Sdc4	5.74e-301	0.969335	0.467	0.127	9.19e-297	Macrophages	Sdc4
Lst1	4.45e-301	0.798712	0.566	0.184	7.13e-297	Macrophages	Lst1
Clec4a2	2.94e-302	0.715184	0.327	0.05	4.71e-298	Macrophages	Clec4a2
Fth1	5.19e-306	0.568353	0.984	0.981	8.32e-302	Macrophages	Fth1
Ccl7	0	2.46333	0.45	0.032	0	Macrophages	Ccl7
C1qb	0	2.40147	0.396	0.047	0	Macrophages	C1qb
Apoe	0	2.31189	0.684	0.136	0	Macrophages	Apoe
Pf4	0	2.18491	0.281	0.017	0	Macrophages	Pf4
Ccl2	0	2.13048	0.567	0.071	0	Macrophages	Ccl2
Arg1	0	2.0153	0.257	0.01	0	Macrophages	Arg1
C1qa	0	2.00203	0.303	0.031	0	Macrophages	C1qa
C1qc	0	1.97378	0.342	0.03	0	Macrophages	C1qc
Lgmn	0	1.7717	0.78	0.224	0	Macrophages	Lgmn
Mafb	0	1.68681	0.642	0.086	0	Macrophages	Mafb
Ctsb	0	1.6181	0.882	0.455	0	Macrophages	Ctsb
Lgals3	0	1.58833	0.875	0.44	0	Macrophages	Lgals3
Ccl9	0	1.54301	0.579	0.112	0	Macrophages	Ccl9
Ms4a7	0	1.51647	0.35	0.02	0	Macrophages	Ms4a7
Tgfbi	0	1.40179	0.683	0.194	0	Macrophages	Tgfbi
Thbs1	0	1.37142	0.698	0.216	0	Macrophages	Thbs1
Ctsl	0	1.34047	0.649	0.163	0	Macrophages	Ctsl
Hmox1	0	1.26775	0.462	0.094	0	Macrophages	Hmox1
Ctsd	0	1.26762	0.742	0.334	0	Macrophages	Ctsd
Vim	0	1.22612	0.898	0.574	0	Macrophages	Vim
Cd68	0	1.18796	0.679	0.245	0	Macrophages	Cd68
Lrp1	0	1.18141	0.508	0.072	0	Macrophages	Lrp1
Fcgr1	0	1.14715	0.561	0.099	0	Macrophages	Fcgr1
Plin2	0	1.14277	0.77	0.278	0	Macrophages	Plin2
Lyz2	0	1.14059	0.784	0.245	0	Macrophages	Lyz2
Fcgr2b	0	1.13872	0.589	0.144	0	Macrophages	Fcgr2b
Zeb2	0	1.10792	0.697	0.207	0	Macrophages	Zeb2
Aif1	0	1.09108	0.521	0.126	0	Macrophages	Aif1
Grn	0	1.0862	0.684	0.262	0	Macrophages	Grn
F13a1	0	1.06937	0.355	0.046	0	Macrophages	F13a1
Trem2	0	1.04652	0.292	0.016	0	Macrophages	Trem2
C3ar1	0	1.04585	0.425	0.027	0	Macrophages	C3ar1
Ctsc	0	1.04519	0.628	0.255	0	Macrophages	Ctsc
Psap	0	1.03476	0.881	0.537	0	Macrophages	Psap
Ccl6	0	1.02274	0.665	0.25	0	Macrophages	Ccl6
Ctss	0	1.0211	0.827	0.465	0	Macrophages	Ctss
Anxa5	0	1.02026	0.689	0.314	0	Macrophages	Anxa5
Cndp2	0	0.984578	0.558	0.132	0	Macrophages	Cndp2
Emp1	0	0.980707	0.362	0.052	0	Macrophages	Emp1
Ftl1	0	0.964113	0.966	0.893	0	Macrophages	Ftl1
Ms4a6d	0	0.939316	0.497	0.116	0	Macrophages	Ms4a6d
Ecm1	0	0.915006	0.328	0.041	0	Macrophages	Ecm1
Metrnl	0	0.912014	0.499	0.131	0	Macrophages	Metrnl
Pid1	0	0.90821	0.414	0.071	0	Macrophages	Pid1
App	0	0.898424	0.608	0.19	0	Macrophages	App
Ms4a4a	0	0.894956	0.436	0.097	0	Macrophages	Ms4a4a
Cstb	0	0.894952	0.795	0.433	0	Macrophages	Cstb
Dab2	0	0.870171	0.392	0.075	0	Macrophages	Dab2
Fcer1g	0	0.861404	0.873	0.551	0	Macrophages	Fcer1g
Rab7b	0	0.854516	0.391	0.073	0	Macrophages	Rab7b
Mmp14	0	0.840727	0.32	0.038	0	Macrophages	Mmp14
Capg	0	0.83786	0.674	0.278	0	Macrophages	Capg
Ctsz	0	0.815697	0.772	0.394	0	Macrophages	Ctsz
Csf1r	0	0.792632	0.456	0.106	0	Macrophages	Csf1r
Cd93	0	0.756371	0.368	0.051	0	Macrophages	Cd93
Msr1	0	0.713303	0.313	0.033	0	Macrophages	Msr1
Slc11a1	0	0.713208	0.377	0.06	0	Macrophages	Slc11a1
Rgl1	0	0.685558	0.28	0.027	0	Macrophages	Rgl1
Adgre1	0	0.681757	0.271	0.026	0	Macrophages	Adgre1
Fcgr3	0	0.677878	0.562	0.158	0	Macrophages	Fcgr3
Cd14	0	0.672024	0.72	0.28	0	Macrophages	Cd14
Slc7a8	0	0.654093	0.266	0.021	0	Macrophages	Slc7a8
Cd631	1.05e-32	0.671388	0.32	0.193	1.69e-28	cDC	Cd63
Id2	6.92e-34	0.341112	0.722	0.526	1.11e-29	cDC	Id2
Rgs11	2.22e-34	0.252282	0.688	0.47	3.55e-30	cDC	Rgs1
Ly6a	1.31e-39	0.481684	0.558	0.374	2.1e-35	cDC	Ly6a
Npc21	8.81e-44	0.297122	0.917	0.633	1.41e-39	cDC	Npc2
Cycs	5.13e-44	0.276049	0.664	0.423	8.21e-40	cDC	Cycs
Zfp36l1	2.65e-45	0.267092	0.608	0.362	4.25e-41	cDC	Zfp36l1
Serpinb6b	9.91e-47	0.7139	0.27	0.126	1.59e-42	cDC	Serpinb6b
Ms4a4c1	1.71e-47	0.291606	0.442	0.235	2.73e-43	cDC	Ms4a4c
Eif5a	1.16e-47	0.25223	0.777	0.515	1.85e-43	cDC	Eif5a
Fabp51	1.59e-49	0.865921	0.469	0.285	2.54e-45	cDC	Fabp5
Ppdpf	7.57e-50	0.265633	0.422	0.217	1.21e-45	cDC	Ppdpf
Sdf2l11	4.55e-50	0.314872	0.357	0.175	7.29e-46	cDC	Sdf2l1
Anxa21	1.7e-50	0.281804	0.848	0.551	2.73e-46	cDC	Anxa2
Cox5a	3.22e-52	0.261319	0.825	0.549	5.15e-48	cDC	Cox5a
Anxa41	2.24e-54	0.262208	0.3	0.132	3.59e-50	cDC	Anxa4
Nampt	3.34e-55	0.286473	0.345	0.157	5.35e-51	cDC	Nampt
Sumo2	4.73e-57	0.267786	0.782	0.475	7.57e-53	cDC	Sumo2
Actr3	3.44e-57	0.265077	0.831	0.531	5.51e-53	cDC	Actr3
Txndc17	5.49e-58	0.45855	0.585	0.324	8.8e-54	cDC	Txndc17
Gnai2	1.04e-58	0.269094	0.885	0.589	1.67e-54	cDC	Gnai2
Rab21	1.39e-60	0.250099	0.251	0.094	2.23e-56	cDC	Rab21
Sec61b	1.06e-62	0.300279	0.903	0.628	1.7e-58	cDC	Sec61b
Paf1	3.94e-63	0.265138	0.295	0.118	6.3e-59	cDC	Paf1
Gm45716	8.66e-64	0.302907	0.296	0.118	1.39e-59	cDC	Gm45716
Rps251	6.98e-66	0.274201	0.936	0.71	1.12e-61	cDC	Rps25
Foxp1	5.14e-68	0.313918	0.478	0.231	8.23e-64	cDC	Foxp1
2021-03-05	2.59e-68	0.258526	0.309	0.121	4.15e-64	cDC	2021-03-05
Epsti11	1.79e-68	0.532097	0.531	0.272	2.86e-64	cDC	Epsti1
Cd300a	7.29e-70	0.313011	0.336	0.138	1.17e-65	cDC	Cd300a
Dynll2	5.94e-70	0.252603	0.267	0.094	9.52e-66	cDC	Dynll2
Dusp5	3e-70	0.290862	0.706	0.388	4.81e-66	cDC	Dusp5
Ptprj	7.61e-71	0.257058	0.287	0.105	1.22e-66	cDC	Ptprj
Selplg	5.29e-71	0.251015	0.771	0.429	8.47e-67	cDC	Selplg
Nfkb1	3.61e-71	0.290763	0.49	0.236	5.78e-67	cDC	Nfkb1
Arl5c	4.09e-72	0.559961	0.283	0.111	6.54e-68	cDC	Arl5c
Psmb10	2.6e-73	0.304843	0.604	0.308	4.17e-69	cDC	Psmb10
Tob2	2.36e-73	0.275783	0.414	0.18	3.78e-69	cDC	Tob2
Rtraf	2.03e-73	0.276218	0.648	0.343	3.24e-69	cDC	Rtraf
Bcl2a1b	5.76e-74	0.341812	0.389	0.168	9.23e-70	cDC	Bcl2a1b
Coro1b	5.03e-74	0.279262	0.558	0.275	8.06e-70	cDC	Coro1b
Taldo1	8.94e-75	0.319296	0.701	0.422	1.43e-70	cDC	Taldo1
Arhgdia1	4.75e-75	0.294203	0.824	0.486	7.61e-71	cDC	Arhgdia
Aebp2	1.63e-75	0.309481	0.319	0.121	2.61e-71	cDC	Aebp2
Scpep11	5.53e-76	0.263708	0.422	0.182	8.86e-72	cDC	Scpep1
Tpm4	3.71e-76	0.268017	0.668	0.354	5.95e-72	cDC	Tpm4
Psmb2	3.37e-76	0.261765	0.619	0.31	5.4e-72	cDC	Psmb2
Tmem2561	2.4e-76	0.274827	0.575	0.284	3.84e-72	cDC	Tmem256
Samhd1	1.99e-76	0.268765	0.656	0.334	3.19e-72	cDC	Samhd1
Psma7	3.76e-77	0.330651	0.824	0.495	6.03e-73	cDC	Psma7
Eprs	2.69e-77	0.275313	0.423	0.181	4.31e-73	cDC	Eprs
Ucp21	1.73e-77	0.35929	0.893	0.622	2.77e-73	cDC	Ucp2
Ifitm6	1.38e-77	0.364862	0.335	0.128	2.21e-73	cDC	Ifitm6
Man2b1	1.11e-77	0.278232	0.425	0.182	1.77e-73	cDC	Man2b1
Gsn1	4.37e-78	0.26721	0.46	0.204	6.99e-74	cDC	Gsn
Il4ra	4.3e-78	0.251642	0.452	0.197	6.89e-74	cDC	Il4ra
Ifi205	4.03e-78	0.370495	0.305	0.112	6.46e-74	cDC	Ifi205
Fam96b	2.45e-78	0.27487	0.442	0.192	3.93e-74	cDC	Fam96b
Pfn1	1.14e-78	0.306662	0.979	0.867	1.83e-74	cDC	Pfn1
Sh3bgrl1	8.54e-79	0.306488	0.464	0.21	1.37e-74	cDC	Sh3bgrl
H2-T23	8.06e-79	0.255759	0.574	0.271	1.29e-74	cDC	H2-T23
Arpp19	1.59e-80	0.250911	0.731	0.382	2.55e-76	cDC	Arpp19
Txnrd11	6.06e-81	0.312821	0.402	0.166	9.7e-77	cDC	Txnrd1
Ndufa6	5.71e-81	0.35695	0.782	0.486	9.14e-77	cDC	Ndufa6
Arf4	1.99e-81	0.372389	0.707	0.386	3.19e-77	cDC	Arf4
Rps191	5.54e-83	0.265855	0.989	0.862	8.88e-79	cDC	Rps19
Mllt6	4.66e-83	0.267581	0.283	0.094	7.47e-79	cDC	Mllt6
Ddt	4.12e-83	0.369887	0.285	0.098	6.59e-79	cDC	Ddt
Nenf	3.28e-84	0.261023	0.339	0.124	5.26e-80	cDC	Nenf
Mthfd2	5.05e-85	0.304102	0.257	0.08	8.09e-81	cDC	Mthfd2
Fbl	1.55e-85	0.308356	0.504	0.228	2.49e-81	cDC	Fbl
Zyx	6.3e-86	0.278364	0.625	0.312	1.01e-81	cDC	Zyx
Cd47	2.21e-86	0.343702	0.807	0.459	3.53e-82	cDC	Cd47
Tap2	2.19e-86	0.275074	0.392	0.152	3.51e-82	cDC	Tap2
Kctd12	7.42e-87	0.301868	0.464	0.2	1.19e-82	cDC	Kctd12
Samsn1	1.37e-87	0.470383	0.569	0.289	2.19e-83	cDC	Samsn1
Purb	7.51e-88	0.270092	0.414	0.164	1.2e-83	cDC	Purb
Ly861	8.3e-89	0.253407	0.483	0.2	1.33e-84	cDC	Ly86
Ywhae	3.05e-89	0.324652	0.74	0.392	4.89e-85	cDC	Ywhae
Tbca	2.11e-89	0.334673	0.708	0.379	3.38e-85	cDC	Tbca
Ptger4	8.46e-90	0.339254	0.312	0.106	1.35e-85	cDC	Ptger4
Rin3	3.25e-90	0.256379	0.309	0.102	5.21e-86	cDC	Rin3
Serpinb9	2.42e-90	0.602334	0.284	0.093	3.88e-86	cDC	Serpinb9
Plekho11	1.28e-90	0.304057	0.417	0.165	2.04e-86	cDC	Plekho1
Rheb	3.06e-91	0.290317	0.559	0.258	4.91e-87	cDC	Rheb
Pgap2	1.07e-91	0.326326	0.264	0.081	1.71e-87	cDC	Pgap2
Fam49b	7.58e-92	0.356812	0.67	0.339	1.21e-87	cDC	Fam49b
Trim35	4.89e-92	0.290636	0.262	0.078	7.84e-88	cDC	Trim35
Pafah1b3	1.97e-92	0.260932	0.26	0.076	3.15e-88	cDC	Pafah1b3
Gtpbp4	9.14e-93	0.29419	0.338	0.118	1.46e-88	cDC	Gtpbp4
Psma1	3.86e-93	0.311643	0.532	0.236	6.18e-89	cDC	Psma1
Nr4a2	8.32e-94	0.392411	0.445	0.181	1.33e-89	cDC	Nr4a2
Rgs10	1.14e-94	0.548651	0.5	0.222	1.83e-90	cDC	Rgs10
Ctsz1	1.06e-94	0.286693	0.864	0.438	1.69e-90	cDC	Ctsz
Pomp	9.49e-95	0.395406	0.783	0.444	1.52e-90	cDC	Pomp
Smarce1	8.3e-95	0.321222	0.402	0.152	1.33e-90	cDC	Smarce1
Ssfa21	8.23e-95	0.301036	0.378	0.138	1.32e-90	cDC	Ssfa2
Nrip1	2.08e-95	0.352558	0.327	0.11	3.34e-91	cDC	Nrip1
Mkrn11	1.89e-95	0.292673	0.608	0.29	3.03e-91	cDC	Mkrn1
Tspan3	3.09e-96	0.668086	0.291	0.097	4.94e-92	cDC	Tspan3
Gm42031	1.4e-96	0.289599	0.327	0.109	2.24e-92	cDC	Gm42031
Bcl2a1a	3.11e-97	0.362765	0.259	0.075	4.98e-93	cDC	Bcl2a1a
Cd274	2.1e-97	0.347391	0.435	0.169	3.36e-93	cDC	Cd274
Pde4b	8.82e-98	0.367732	0.775	0.415	1.41e-93	cDC	Pde4b
Antxr2	5.25e-98	0.277954	0.309	0.097	8.41e-94	cDC	Antxr2
Cfl1	1.55e-98	0.346259	0.974	0.812	2.48e-94	cDC	Cfl1
Spag91	3.34e-99	0.278569	0.585	0.261	5.35e-95	cDC	Spag9
Pgls	2.75e-99	0.269393	0.664	0.311	4.41e-95	cDC	Pgls
Stat1	2.04e-99	0.476829	0.568	0.267	3.27e-95	cDC	Stat1
Irf8	1.99e-99	0.586329	0.507	0.234	3.19e-95	cDC	Irf8
Sp110	1.52e-99	0.316844	0.456	0.179	2.43e-95	cDC	Sp110
Agpat4	7.92e-100	0.25422	0.312	0.098	1.27e-95	cDC	Agpat4
Sri	2.75e-101	0.360373	0.706	0.359	4.4e-97	cDC	Sri
Fyn	2.13e-101	0.284682	0.491	0.193	3.41e-97	cDC	Fyn
Sdhaf1	1.58e-101	0.368375	0.44	0.171	2.53e-97	cDC	Sdhaf1
Ndrg11	1.44e-101	0.516295	0.439	0.176	2.31e-97	cDC	Ndrg1
Stat4	9.18e-102	0.387419	0.329	0.106	1.47e-97	cDC	Stat4
Chp1	4.48e-102	0.313122	0.422	0.158	7.18e-98	cDC	Chp1
Necap2	4.41e-102	0.303571	0.41	0.151	7.06e-98	cDC	Necap2
Foxn3	3.17e-102	0.303759	0.403	0.146	5.08e-98	cDC	Foxn3
Nfkb2	1.43e-102	0.35706	0.432	0.164	2.3e-98	cDC	Nfkb2
Mif4gd	1.34e-102	0.344034	0.364	0.126	2.14e-98	cDC	Mif4gd
Glipr2	4.1e-103	0.553732	0.383	0.141	6.57e-99	cDC	Glipr2
Ube2e3	3.5e-103	0.295538	0.294	0.088	5.61e-99	cDC	Ube2e3
Tap1	1.93e-103	0.347049	0.553	0.239	3.09e-99	cDC	Tap1
Bmp2k	1.04e-103	0.407157	0.262	0.073	1.66e-99	cDC	Bmp2k
Psmg4	4.25e-104	0.390381	0.388	0.14	6.8e-100	cDC	Psmg4
Hax1	2.67e-104	0.363782	0.368	0.13	4.27e-100	cDC	Hax1
Arl8b	1.17e-104	0.327719	0.419	0.157	1.87e-100	cDC	Arl8b
Swap70	9.15e-105	0.428868	0.281	0.083	1.47e-100	cDC	Swap70
Malt1	8.13e-106	0.429858	0.585	0.267	1.3e-101	cDC	Malt1
Sod1	3.38e-106	0.315034	0.437	0.162	5.41e-102	cDC	Sod1
Map3k1	1.9e-106	0.402255	0.302	0.091	3.04e-102	cDC	Map3k1
Zfp106	6.4e-107	0.281788	0.4	0.14	1.02e-102	cDC	Zfp106
Runx3	1.8e-107	0.327838	0.616	0.274	2.87e-103	cDC	Runx3
Marcksl1	2e-108	0.725484	0.541	0.258	3.21e-104	cDC	Marcksl1
Psme2b	1.98e-108	0.323972	0.292	0.084	3.17e-104	cDC	Psme2b
Gpx11	5.32e-109	0.264118	0.943	0.632	8.52e-105	cDC	Gpx1
Sub1	1.71e-109	0.418776	0.947	0.7	2.73e-105	cDC	Sub1
Ccnd21	5e-110	0.400351	0.469	0.178	8.01e-106	cDC	Ccnd2
Nudt9	3.26e-110	0.435486	0.259	0.069	5.22e-106	cDC	Nudt9
Mrpl14	5.92e-111	0.392733	0.516	0.213	9.47e-107	cDC	Mrpl14
Csf2rb2	6.27e-112	0.376704	0.356	0.115	1e-107	cDC	Csf2rb2
S100a4	4.35e-113	0.581376	0.654	0.338	6.96e-109	cDC	S100a4
Wdr1	6.39e-114	0.391403	0.63	0.285	1.02e-109	cDC	Wdr1
Nfkbib	4.49e-114	0.408066	0.605	0.267	7.18e-110	cDC	Nfkbib
Ctss1	4.31e-115	0.296122	0.938	0.503	6.9e-111	cDC	Ctss
Tnip3	3.86e-115	0.416246	0.271	0.071	6.19e-111	cDC	Tnip3
Ncf1	1.45e-116	0.343627	0.431	0.153	2.32e-112	cDC	Ncf1
Srebf2	1.01e-116	0.296631	0.383	0.125	1.62e-112	cDC	Srebf2
Erp29	7.42e-120	0.415908	0.72	0.354	1.19e-115	cDC	Erp29
Gfpt1	7.49e-124	0.479757	0.339	0.102	1.2e-119	cDC	Gfpt1
Fam129a	9.47e-127	0.356304	0.338	0.096	1.52e-122	cDC	Fam129a
Gpr137b1	5.06e-127	0.352074	0.442	0.151	8.1e-123	cDC	Gpr137b
Ggta1	3.47e-127	0.377818	0.294	0.077	5.55e-123	cDC	Ggta1
Pcyt1a	1.91e-127	0.610458	0.371	0.121	3.06e-123	cDC	Pcyt1a
Fnbp1	1.78e-127	0.430155	0.489	0.181	2.85e-123	cDC	Fnbp1
Smdt1	4.08e-129	0.518304	0.813	0.47	6.53e-125	cDC	Smdt1
Phf11b	1.74e-129	0.401953	0.406	0.131	2.78e-125	cDC	Phf11b
Zmiz2	5e-131	0.332881	0.341	0.096	8.01e-127	cDC	Zmiz2
Ahr	8.11e-132	0.320135	0.301	0.075	1.3e-127	cDC	Ahr
Rala	5.17e-132	0.418037	0.607	0.253	8.28e-128	cDC	Rala
Nap1l1	1.31e-132	0.447889	0.706	0.324	2.1e-128	cDC	Nap1l1
Arl5a	1.22e-132	0.460534	0.326	0.09	1.96e-128	cDC	Arl5a
Vrk1	3.17e-134	0.327891	0.303	0.076	5.07e-130	cDC	Vrk1
Itga4	6.4e-135	0.594966	0.498	0.186	1.02e-130	cDC	Itga4
Bhlhe40	4.25e-135	0.528408	0.78	0.407	6.8e-131	cDC	Bhlhe40
Mt11	1.4e-135	0.577402	0.713	0.343	2.25e-131	cDC	Mt1
Mvp	1e-135	0.3817	0.432	0.141	1.61e-131	cDC	Mvp
Ywhah	1.71e-137	0.478159	0.718	0.331	2.75e-133	cDC	Ywhah
[truncated: 1,260 more rows]
